# Supplementary material for: A seven-transmembrane protein-TM7SF3, resides in nuclear speckles and regulates alternative splicing
Source: PubMed Central journal article supplement — iScience. 2022 Oct 4;25(11):105270. doi: 10.1016/j.isci.2022.105270 (PMC9593240; doi:10.1016/j.isci.2022.105270), 2022-10-04
Supplement: mmc1.pdf [file mmc1.pdf]

**Supplemental information**

**A seven-transmembrane  
protein-TM7SF3, resides in nuclear  
speckles and regulates alternative splicing**

**Roi Isaac, Yaron Vinik, Martin Mikl, Shani Nadav-Eliyahu, Hadas Shatz-Azoulay, Adi Yaakobi, Natalie DeForest, Amit R. Majithia, Nicholas J.G. Webster, Yaron Shav-Tal, Eytan Elhanany, and Yehiel Zick**

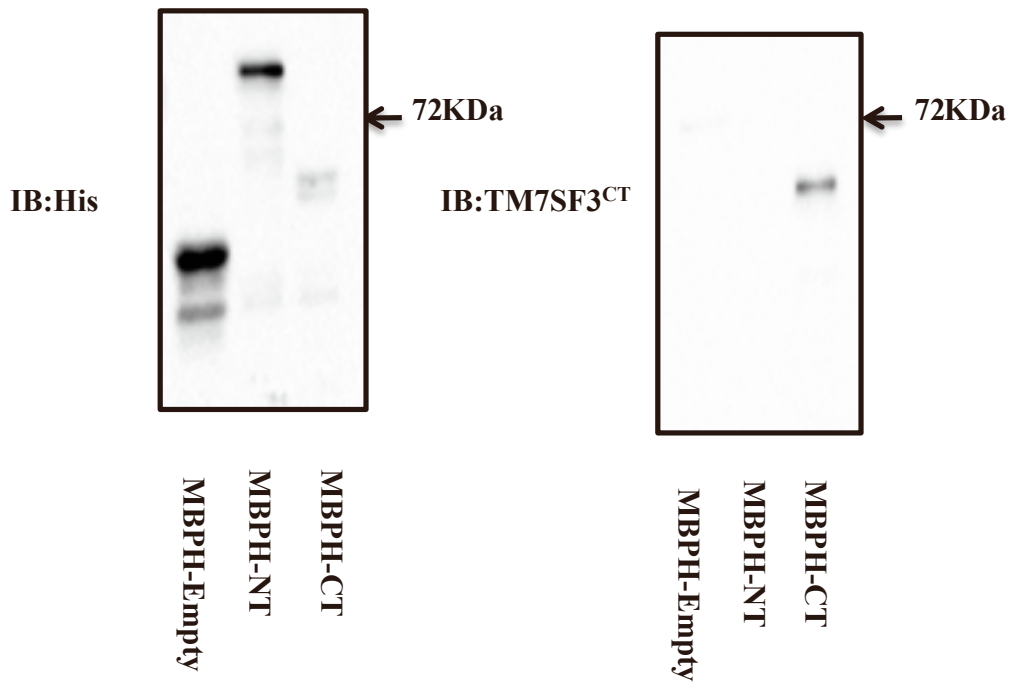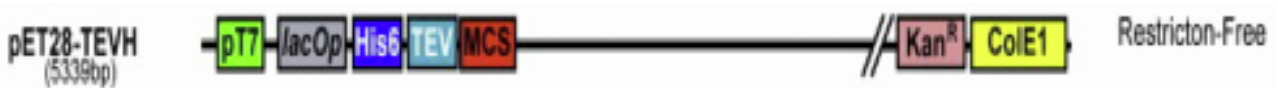

pETMBPH-TEVH MBP + His (42 kDa)

N-terminus - 800bp ~29kDa

EL-3 - 110bp ~4.2kDa

C-terminus - 210bp ~ 7.6kDa

**Fig S1. TM7SF3<sup>CT</sup> antibodies interact with the C terminal end of the TM7SF3 protein. Related to Figure 1.** Proteins were extracted from DH5alpha cells expressing maltose binding protein (MBP) with 6XHIS tag alone, or cells expressing recombinant TM7SF3 protein fragments. An N-terminus fragment (aa 24-290) and a C-terminus fragment (aa 496-564), both tagged at their amino terminus with 6xHis and MBP (Maltose binding protein)-TEVH. Samples were immunoblotted with antibodies against His or TM7SF3<sup>CT</sup> as indicated.

## HFF cells

## HEK cells – hTM7SF3

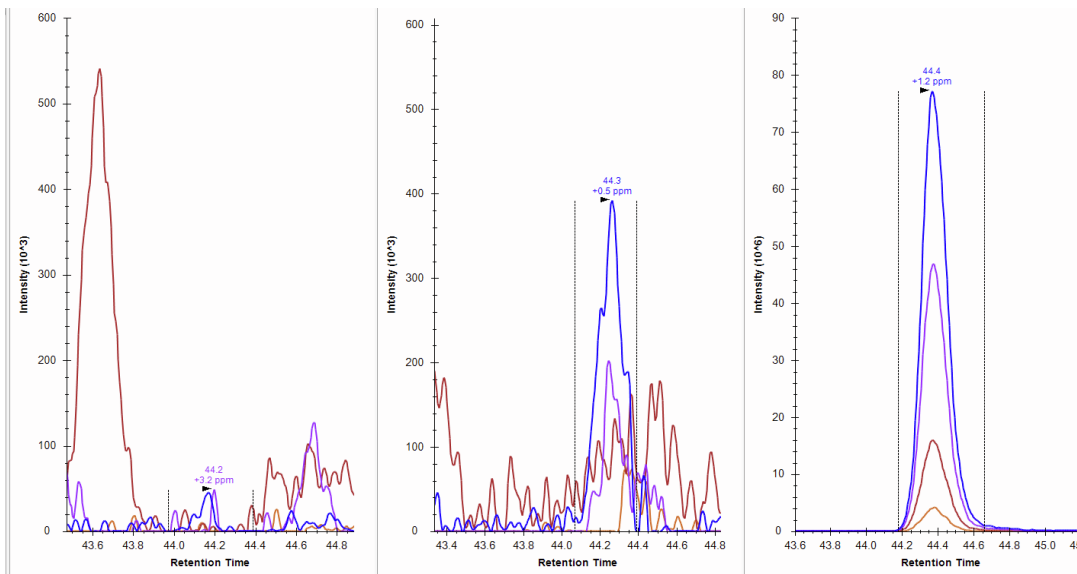

IP:PreImmune  
Serum

IP:TM7SF3<sup>CT</sup>

IP:TM7SF3<sup>CT</sup>

<https://youtu.be/Imrtvv3DNJQ>

**Fig. S2** Examples of Unique peptides identified by mass spectrometry. Related to Figure 1. Unique peptide intensity (FAPANLGYAR; blue peak) among 3 unique TM7SF3 peptides that were identified in experiment described in Table S4 B-C.

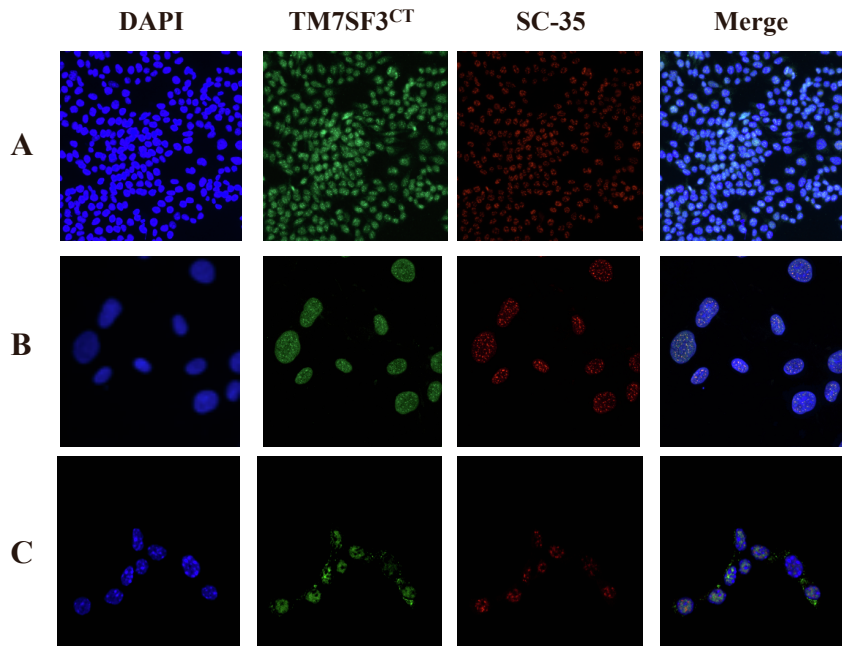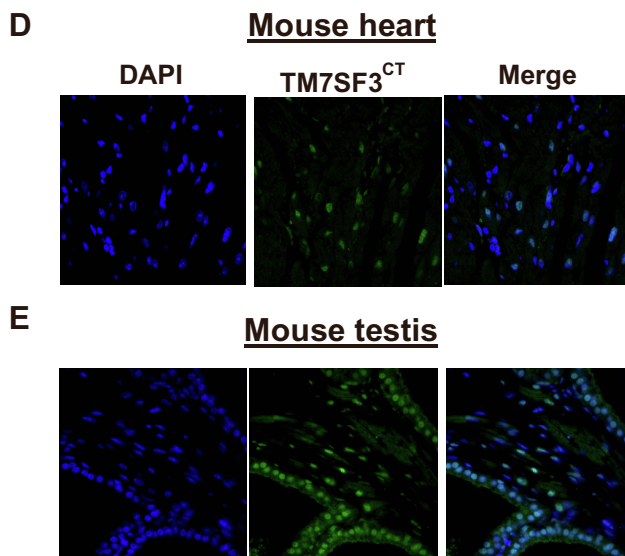

**Fig S3. TM7SF3 is localizes to nuclear speckles. Related to Figure 2. A-C.** HCT (A), HFF (B) and MIN6 (C) cells were fixed by MeOH for 40 min. and stained with DAPI (blue) and immunostained with anti-TM7SF3<sup>CT</sup> (Green) and anti-SC-35 (Red) antibodies. Paraffin sections of mouse Heart (E) and Testis (F) were stained with DAPI (blue) and immunostained with anti-TM7SF3<sup>CT</sup> (Green) antibodies. n=2-3.

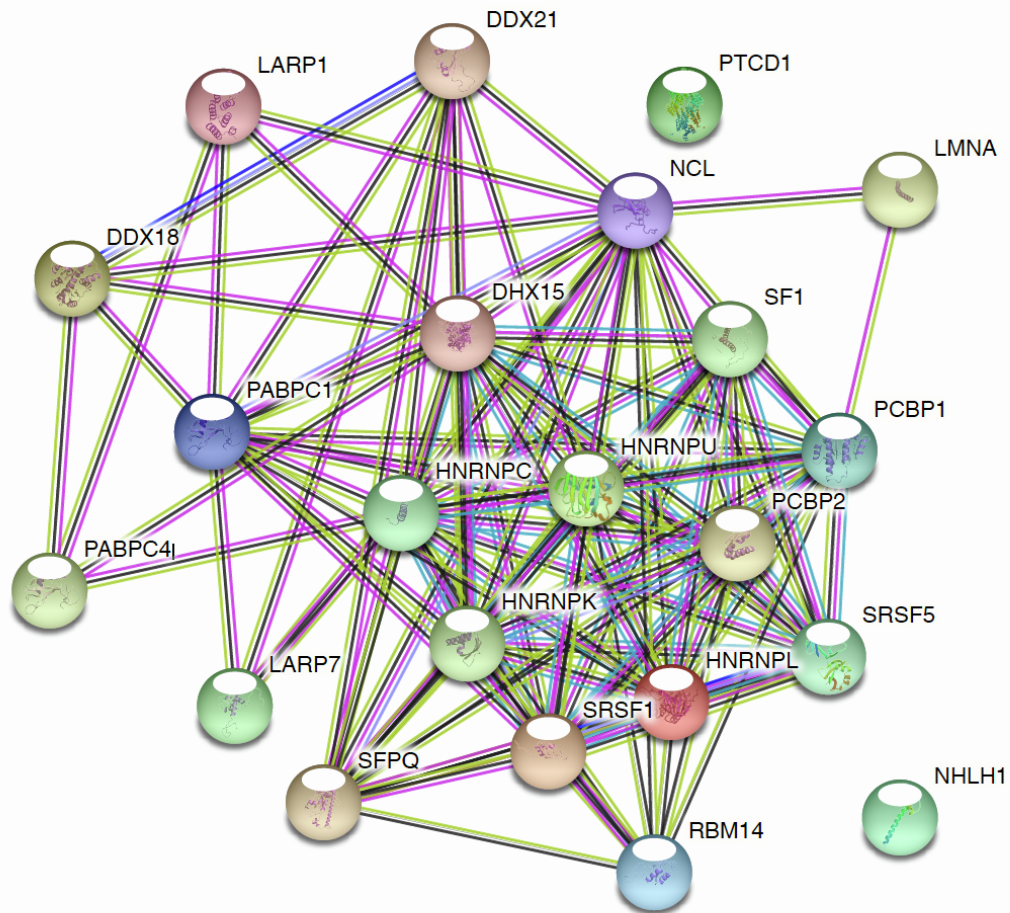

**Fig S4. STRING analysis of RNA binding proteins that co-precipitated with TM7SF3 and the splicing regulators that interact with them. Related to Figure 4 (DHX15, DDX21, NCL, LMNA , HNRNPK, PABPC1 , LARP7, HNRNPU ,HNRNPL, PABPC4 , PTCD1, DDX18, RBM14, LARP1) and the splicing regulators (SRSF1, HNRNPC, PCBP1, PCBP2, HEN1, SRSF5, SFPQ, and SF1, Table S6) that bind the motif at the start/end of introns, having the highest confidence of enrichment in siTM7SF3 (PPI enrichment p-value:  $< 1.0 \times 10^{-16}$ ).**

A

## Differential expression

The plots below summarize the number of DE (differentially expressed) genes for comparison. Additional details about each comparison may be found tables below the plots (click on the links to look at the top genes, volcano plot and heatmap). The full data related to each comparison is contained in the attached .xlsx spreadsheets.

Below, we set the threshold for **significant differential expression (DE)** at:

- $\text{padj} \leq 0.05$
- $|\log_2\text{FoldChange}| \geq 1$
- $\text{max\_count} \geq 30$

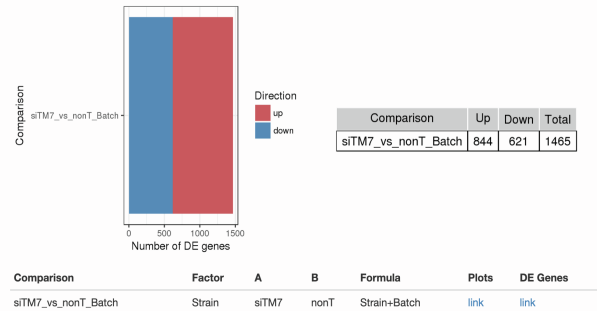

| Comparison          | Factor | A     | B    | Formula      | Plots                | DE Genes             |
|---------------------|--------|-------|------|--------------|----------------------|----------------------|
| siTM7_vs_nonT_Batch | Strain | siTM7 | nonT | Strain+Batch | <a href="#">link</a> | <a href="#">link</a> |

## Heatmap

The heatmap presents **only the differentially expressed genes** (although all samples are shown).

B

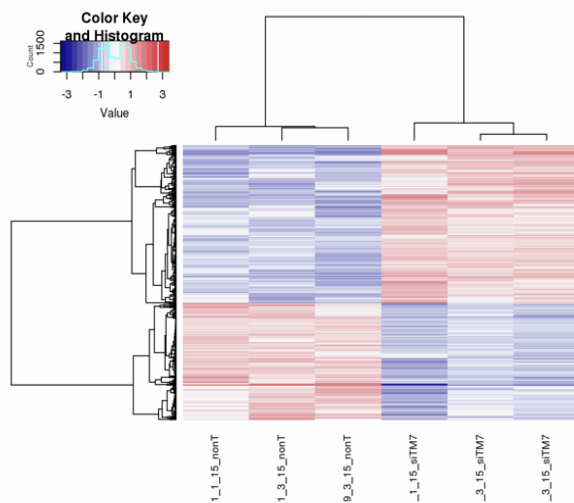

C

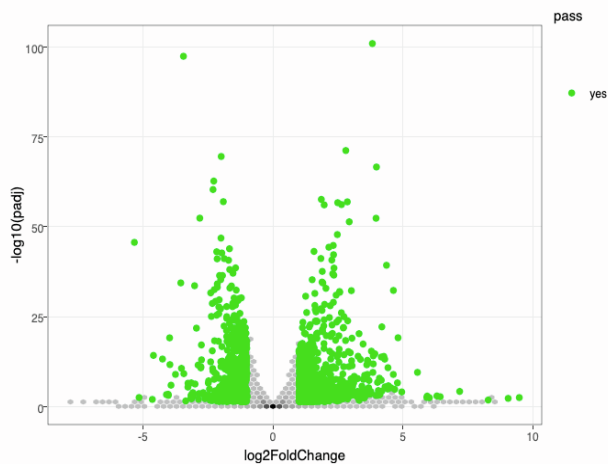

**Fig S5 Differential expression genes in U2-OS cells that were transfected with siRNA TM7SF3. Related to Figure 4.** RNAseq was performed as described in methods. The threshold set for significant differential expression (DE) genes is shown in (A). The genes that were differentially expressed (844 upregulated and 621 downregulated) is shown in the heatmap (B). The Volcano plot the genes whose expression was significantly affected is shown in C.



### **Supplemental Tables**

**Table S1. Growth medium of the cell-lines used. Related to STAR Methods**

| Cell line           | Growth medium                                         | Comments                            |
|---------------------|-------------------------------------------------------|-------------------------------------|
| HFF                 | MEM-Eagle (01-040-01) 15% FBS                         |                                     |
| U2-OS               | McCoy's 5A 10% FBS                                    |                                     |
| HEK 293, HepG2, HCT | DMEM (4.5 g glucose/L), 10% FBS                       |                                     |
| MIN6                | DMEM 10% FBS, 11.1mM glucose                          | 70 $\mu$ M $\beta$ -mercaptoethanol |
| Human Islets        | CMRL 1066 medium containing 10% (FBS), 1% L-glutamine | 40 $\mu$ g/ml Gentamycin            |

**Table S2. List of primers used for real time PCR analysis in this study. Related to STAR Methods**

| Primer Name | Sequence (5'-3')         |
|-------------|--------------------------|
| hPIG3ex1 f  | AGGACCGGAAAACCTCTACG     |
| hPIG3ex1 r  | GCCACCTTCAGGAGGACTTC     |
| hPIG3ex35 f | CTGAAATTCACCAAAGTACAAGCA |
| hPIG3ex35 r | CTGGATTTCGGTCACTGGGT     |
|             |                          |
|             |                          |
|             |                          |
|             |                          |



**Table S3. List of primers used for PCR analysis of genes whose alternative splicing is affected by TM7SF3. Related to STAR Methods.**

| <b>Oligo Name</b> | <b>Sequence (5'-3')</b>    |
|-------------------|----------------------------|
| EZH2 F            | GTGAGCTCATTGGCGGGACTAGGGAG |
| EZH2 R            | ATTCAGAGTCTTTAATGGGATGACT  |
| SRSF7 F           | GGGAATGAAGTGAGGCCAGTGG     |
| SRSF7 R           | AATACCGCCAGAATCCATGGG      |
| XBP1 F            | GCGATCGGAGGCTCAGAGAAC      |
| XBP1 R            | GCCCTCGAACACACTGTAGGG      |
| EIF6 F            | GCGATCGGAGGCTCAGAGAAC      |
| EIF6 R            | GCCCTCGAACACACTGTAGGG      |
| VEGFB F           | AGGGAGACGTTTGCAGTGAG       |
| VEGFB R           | TGCCATGCTTGTAATCCAGCG      |
| MRPL52 F          | AGGGAGACGTTTGCAGTGAG       |
| MRPL52 R          | TGCCATGCTTGTAATCCAGCG      |
| PIG3 F            | TTACGACGGGTTGGGGATGG       |
| PIG3 R            | TGCCAAACCAGCTCCTACTC       |
| MCL1 F            | TTACGACGGGTTGGGGATGG       |
| MCL1 R            | TGCCAAACCAGCTCCTACTC       |
| ATP5C1 F          | ACCACTAGTGAGCAGAGTGC       |
| ATP5C1 R          | TTCTTCGGACAAAGGCAGCA       |
| TM7SF3 F          | AGTGCTCTCAAGGTGGTTAC       |
| TM7SF3 R          | GAAACGGGTCCCAAACAATG       |
| GAPDH F           | CCACTCCTCCACCTTTGAC        |
| GAPDH R           | ACCCTGTTGCTGTAGCCA         |
| CLSTN1 F          | TTCTGCAGCTCACAGTCCAG       |
| CLSTN1 R          | CCACCTACCACGGCATAGTC       |
| ADD3 F            | ACCAGCTCCTCCTAACCCAT       |
| ADD3 R            | TCACTCGCTTAGCAAGCTCAT      |
| VLDLR F           | CCTGCCAGCACCACAGATTA       |
| VLDLR R           | CCCTTTTGGGGGAACACTGA       |
| ECHDC1 F          | ACCCAATGCCAACCTTGAA        |
| ECHDC1 R          | GGAAAGGCCTCATTGTCCGT       |
| PLEKHM2 F         | GGTCCACGGCTCAGACAG         |
| PLEKHM2 R         | CCTCGTTGAAGGGGTTCTGG       |

**Table S4 TM7SF3 protein identified by Mass spectrometry in samples immunoprecipitated by TM7SF3<sup>CT</sup> antibodies. Related to Figure 1.** Proteins were extracted from U2-OS (A), HFF or HEK (B) cells overexpressing the human TM7SF3 protein. Samples were immunoprecipitated with Pre-immune serum or TM7SF3<sup>CT</sup> antibody and gel bands (above and below 72KDa) were subjected to Mass spectrometry analysis.

A

| Accession                    | Description                                                              |                     |                  |                     |                 |          |            |       |
|------------------------------|--------------------------------------------------------------------------|---------------------|------------------|---------------------|-----------------|----------|------------|-------|
| Q9NS93                       | Transmembrane 7 superfamily member 3 OS=Homo sapiens GN=TM7SF3 PE=2 SV=1 |                     |                  |                     |                 |          |            |       |
|                              | $\Sigma$ Coverage                                                        | $\Sigma$ # Proteins | # Unique Peptide | $\Sigma$ # Peptides | $\Sigma$ # PSMs |          |            |       |
|                              | 8.77                                                                     | 8                   | 4                | 4                   | 16              |          |            |       |
| <b>IP:PreImmune serum</b>    |                                                                          |                     |                  |                     |                 |          |            |       |
| <b>Mascot</b>                |                                                                          |                     |                  | <b>Sequest</b>      |                 |          |            |       |
|                              | Score                                                                    | Coverage            | # Peptides       | # PSM               | Score           | Coverage | # Peptides | # PSM |
| Gel Band #1                  |                                                                          |                     |                  |                     |                 | 0.00     |            |       |
| Gel Band #2                  |                                                                          |                     |                  |                     |                 | 0.00     |            |       |
| <b>IP:TM7SF3-CT antibody</b> |                                                                          |                     |                  |                     |                 |          |            |       |
|                              | <b>Mascot</b>                                                            |                     |                  | <b>Sequest</b>      |                 |          |            |       |
|                              | Score                                                                    | Coverage            | # Peptides       | # PSM               | Score           | Coverage | # Peptides | # PSM |
| Gel Band #1                  | 109.51                                                                   | 7.02                | 3                | 3                   | 5.91            | 4.21     | 2          | 2     |
| Gel Band #2                  | 59.48                                                                    | 5.44                | 2                | 2                   | 5.79            | 4.21     | 2          | 2     |
| Gel Band #3                  | 138.15                                                                   | 6.14                | 3                | 3                   | 10.81           | 8.77     | 4          | 4     |

B.

| Accession                                                       | Description                                                              |                     |              |                     |                 |          |            |       |
|-----------------------------------------------------------------|--------------------------------------------------------------------------|---------------------|--------------|---------------------|-----------------|----------|------------|-------|
| Q9NS93                                                          | Transmembrane 7 superfamily member 3 OS=Homo sapiens GN=TM7SF3 PE=2 SV=1 |                     |              |                     |                 |          |            |       |
|                                                                 | $\Sigma$ Coverage                                                        | $\Sigma$ # Proteins | Unique Pepti | $\Sigma$ # Peptides | $\Sigma$ # PSMs |          |            |       |
|                                                                 | 10.18                                                                    | 6                   | 3            | 5                   | 15              |          |            |       |
| <b>HFF cells - IP:PreImmune Serum</b>                           |                                                                          |                     |              |                     |                 |          |            |       |
| <b>Mascot</b>                                                   |                                                                          |                     |              | <b>Sequest</b>      |                 |          |            |       |
|                                                                 | Score                                                                    | Coverage            | # Peptides   | # PSM               | Score           | Coverage | # Peptides | # PSM |
| Gel Band #1                                                     |                                                                          |                     |              |                     |                 | 0.00     |            |       |
| Gel Band #2                                                     |                                                                          |                     |              |                     |                 | 0.00     |            |       |
| <b>HFF cells - IP:TM7SF3 CT Antibody</b>                        |                                                                          |                     |              |                     |                 |          |            |       |
| Gel Band #1                                                     |                                                                          | 0.00                |              |                     |                 | 0.00     |            |       |
| Gel Band #2                                                     |                                                                          | 0.00                |              |                     |                 | 0.00     |            |       |
| <b>HEK cells overexpressing hTM7SF3 - IP:TM7SF3 CT Antibody</b> |                                                                          |                     |              |                     |                 |          |            |       |
| Gel Band #1                                                     | 125.98                                                                   | 6.14                | 3            | 3                   | 6.10            | 4.39     | 2          | 2     |
| Gel Band #2                                                     | 174.67                                                                   | 7.02                | 3            | 4                   | 17.31           | 8.42     | 4          | 6     |

**Table-S9- Gene set enrichment analysis. Related to Figure 4.** Analysis was carried out as described under “STAR Methods”. Briefly, DESeq2 was used on the raw count values for each sample to identify differential expressed genes between the two conditions. The Wald test was used within DESeq2 to rank the genes according to their Wald test statistic. Gene set enrichment analysis (GSEA) was employed using the fgsea package along with the MSigDB 7.0 collections: KEGG and REACTOME curated gene sets, and Gene Ontology (GO) gene sets. The default two-sided enrichment p-value with Benjamini–Hochberg correction from the fgsea package was utilized.

| pathway                                      | pval     | padj     |
|----------------------------------------------|----------|----------|
| REACTOME_ACTIVATED_PKN1_STIMULATES_TRANSCRI  | 0.0002   | 0.003617 |
| REACTOME_TELOMERE_MAINTENANCE                | 0.000202 | 0.003617 |
| REACTOME_ERCC6_CSB_AND_EHMT2_G9A_POSITIVELY  | 0.000201 | 0.003617 |
| REACTOME_CONDENSATION_OF_PROPHASE_CHROMOS    | 0.000199 | 0.003617 |
| REACTOME_MEIOTIC_RECOMBINATION               | 0.000203 | 0.003617 |
| REACTOME_HDACS_DEACETYLATE_HISTONES          | 0.000202 | 0.003617 |
| REACTOME_SIRT1_NEGATIVELY_REGULATES_RRNA_EX  | 0.0002   | 0.003617 |
| REACTOME_DEPURINATION                        | 0.0002   | 0.003617 |
| REACTOME_BASE_EXCISION_REPAIR_AP_SITE_FORMAT | 0.000199 | 0.003617 |
| REACTOME_DNA_METHYLATION                     | 0.0002   | 0.003617 |
| REACTOME_RUNX1_REGULATES_GENES_INVOLVED_IN_  | 0.000202 | 0.003617 |
| REACTOME_RHO_GTPASES_ACTIVATE_PKNS           | 0.000204 | 0.003617 |
| REACTOME_NUCLEOSOME_ASSEMBLY                 | 0.000203 | 0.003617 |
| REACTOME_NONHOMOLOGOUS_END_JOINING_NHEJ      | 0.000203 | 0.003617 |
| REACTOME_CHROMOSOME_MAINTENANCE              | 0.000203 | 0.003617 |
| REACTOME_PRC2_METHYLATES_HISTONES_AND_DNA    | 0.000199 | 0.003617 |
| REACTOME_BASE_EXCISION_REPAIR                | 0.000203 | 0.003617 |
| REACTOME_RNA_POLYMERASE_I_PROMOTER_ESCAPE    | 0.000203 | 0.003617 |
| REACTOME_MEIOTIC_SYNAPSIS                    | 0.000203 | 0.003617 |

| pathway                                        | pval     | padj     |
|------------------------------------------------|----------|----------|
| KEGG_SYSTEMIC_LUPUS_ERYTHEMATOSUS              | 0.000203 | 0.003044 |
| KEGG_PYRUVATE_METABOLISM                       | 0.000202 | 0.003044 |
| KEGG_PATHWAYS_IN_CANCER                        | 0.00019  | 0.003044 |
| KEGG_FOCAL_ADHESION                            | 0.000192 | 0.003044 |
| KEGG_ECM_RECEPTOR_INTERACTION                  | 0.000198 | 0.003044 |
| KEGG_CYTOKINE_CYTOKINE_RECEPTOR_INTERACTION    | 0.000192 | 0.003044 |
| KEGG_COMPLEMENT_AND_COAGULATION_CASCADES       | 0.0002   | 0.003044 |
| KEGG_SNARE_INTERACTIONS_IN_VESICULAR_TRANSPORT | 0.000198 | 0.003044 |
| KEGG_ANTIGEN_PROCESSING_AND_PRESENTATION       | 0.000199 | 0.003044 |
| KEGG_AUTOIMMUNE_THYROID_DISEASE                | 0.000201 | 0.003044 |
| KEGG_LYSOSOME                                  | 0.000195 | 0.003044 |
| KEGG_AMINOACYL_TRNA_BIOSYNTHESIS               | 0.000405 | 0.004774 |
| KEGG_P53_SIGNALING_PATHWAY                     | 0.000396 | 0.004774 |
| KEGG_ALLOGRAFT_REJECTION                       | 0.000403 | 0.004774 |
| KEGG_CELL_ADHESION_MOLECULES_CAMS              | 0.000585 | 0.00643  |
| KEGG_TYPE_I_DIABETES_MELLITUS                  | 0.000996 | 0.010271 |
| KEGG_VEGF_SIGNALING_PATHWAY                    | 0.001385 | 0.013446 |
| KEGG_GRAFT_VERSUS_HOST_DISEASE                 | 0.001615 | 0.014803 |
| KEGG_DRUG_METABOLISM_OTHER_ENZYMES             | 0.002193 | 0.019041 |

| pathway                                                  | pval     | padj     |
|----------------------------------------------------------|----------|----------|
| GO_DNA_PACKAGING_COMPLEX                                 | 0.000204 | 0.00786  |
| GO_PROTEIN_HETEROTETRAMERIZATION                         | 0.000202 | 0.00786  |
| GO_ORGAN_OR_TISSUE_SPECIFIC_IMMUNE_RESPONSE              | 0.000203 | 0.00786  |
| GO_NUCLEAR_NUCLEOSOME                                    | 0.000405 | 0.012087 |
| GO_LIGASE_ACTIVITY_FORMING_CARBON_OXYGEN_BONDS           | 0.001012 | 0.020075 |
| GO_NUCLEOSIDE_BISPHOSPHATE_METABOLIC_PROCESS             | 0.001638 | 0.025561 |
| GO_REGULATION_OF_LIPID_CATABOLIC_PROCESS                 | 0.001411 | 0.023512 |
| GO_DNA_REPLICATION_DEPENDENT_NUCLEOSOME_ORGANIZATION     | 0.002239 | 0.029806 |
| GO_HIPPO_SIGNALING                                       | 0.001206 | 0.021638 |
| GO_REGULATION_OF_DENDRITE_EXTENSION                      | 0.003234 | 0.03737  |
| GO_CALCIIUM_ION_REGULATED_EXOCYTOSIS_OF_NEUROTRANSMITTER | 0.002233 | 0.029806 |
| GO_AMINO_ACID_ACTIVATION                                 | 0.002045 | 0.028165 |
| GO_DENDRITE_EXTENSION                                    | 0.002032 | 0.028128 |
| GO_MITOCHONDRIAL_RNA_METABOLIC_PROCESS                   | 0.004093 | 0.042049 |
| GO_REGULATION_OF_MICROTUBULE_DEPOLYMERIZATION            | 0.002435 | 0.031649 |
| GO_THIOESTER_METABOLIC_PROCESS                           | 0.003838 | 0.040887 |
| GO_CELLULAR_RESPONSE_TO_CHOLESTEROL                      | 0.006915 | 0.057    |
| GO_PROTEIN_TRANSPORT_ALONG_MICROTUBULE                   | 0.002046 | 0.028165 |
| GO_ANTIBACTERIAL_HUMORAL_RESPONSE                        | 0.007484 | 0.05869  |
