# Supplementary material for: A seven-transmembrane protein-TM7SF3, resides in nuclear speckles and regulates alternative splicing
Source: PubMed Central journal article supplement — iScience. 2022 Oct 4;25(11):105270. doi: 10.1016/j.isci.2022.105270 (PMC9593240; doi:10.1016/j.isci.2022.105270), 2022-10-04
Supplement: mmc2.pdf [file mmc2.pdf]

| # | Gene                  | LSV ID                                               | LSV Type | ← More in nonT   More in siTM7 → | Coordinates Links |
|---|-----------------------|------------------------------------------------------|----------|----------------------------------|-------------------|
| 0 | <a href="#">ROBO1</a> | <a href="#">gene10205:78646148-78646190:source</a>   |          |                                  |                   |
| 1 | <a href="#">ROBO1</a> | <a href="#">gene10205:78651732-78651929:target</a>   |          |                                  |                   |
| 2 | <a href="#">STK40</a> | <a href="#">gene1035:36385723-36385927:target</a>    |          |                                  |                   |
| 3 | <a href="#">TFDP2</a> | <a href="#">gene11055:142005441-142005544:source</a> |          |                                  |                   |
| 4 | <a href="#">MACF1</a> | <a href="#">gene1109:39413385-39413395:target</a>    |          |                                  |                   |
| 5 | <a href="#">MBNL1</a> | <a href="#">gene11216:152447620-152447773:source</a> |          |                                  |                   |
| 6 | <a href="#">MBNL1</a> | <a href="#">gene11216:152447620-152447773:target</a> |          |                                  |                   |
| 7 | <a href="#">MBNL1</a> | <a href="#">gene11216:152456267-152456361:target</a> |          |                                  |                   |
| 8 | <a href="#">PLD1</a>  | <a href="#">gene11454:171677566-171677694:source</a> |          |                                  |                   |
| 9 | <a href="#">PLD1</a>  | <a href="#">gene11454:171687371-171687584:target</a> |          |                                  |                   |

## LSV filters

- 5-prime
- 3-prime
- Exon skipping
- Single Source
- Single Target

Number of junctions:

from:

to:

Number of exons:

from:

to:

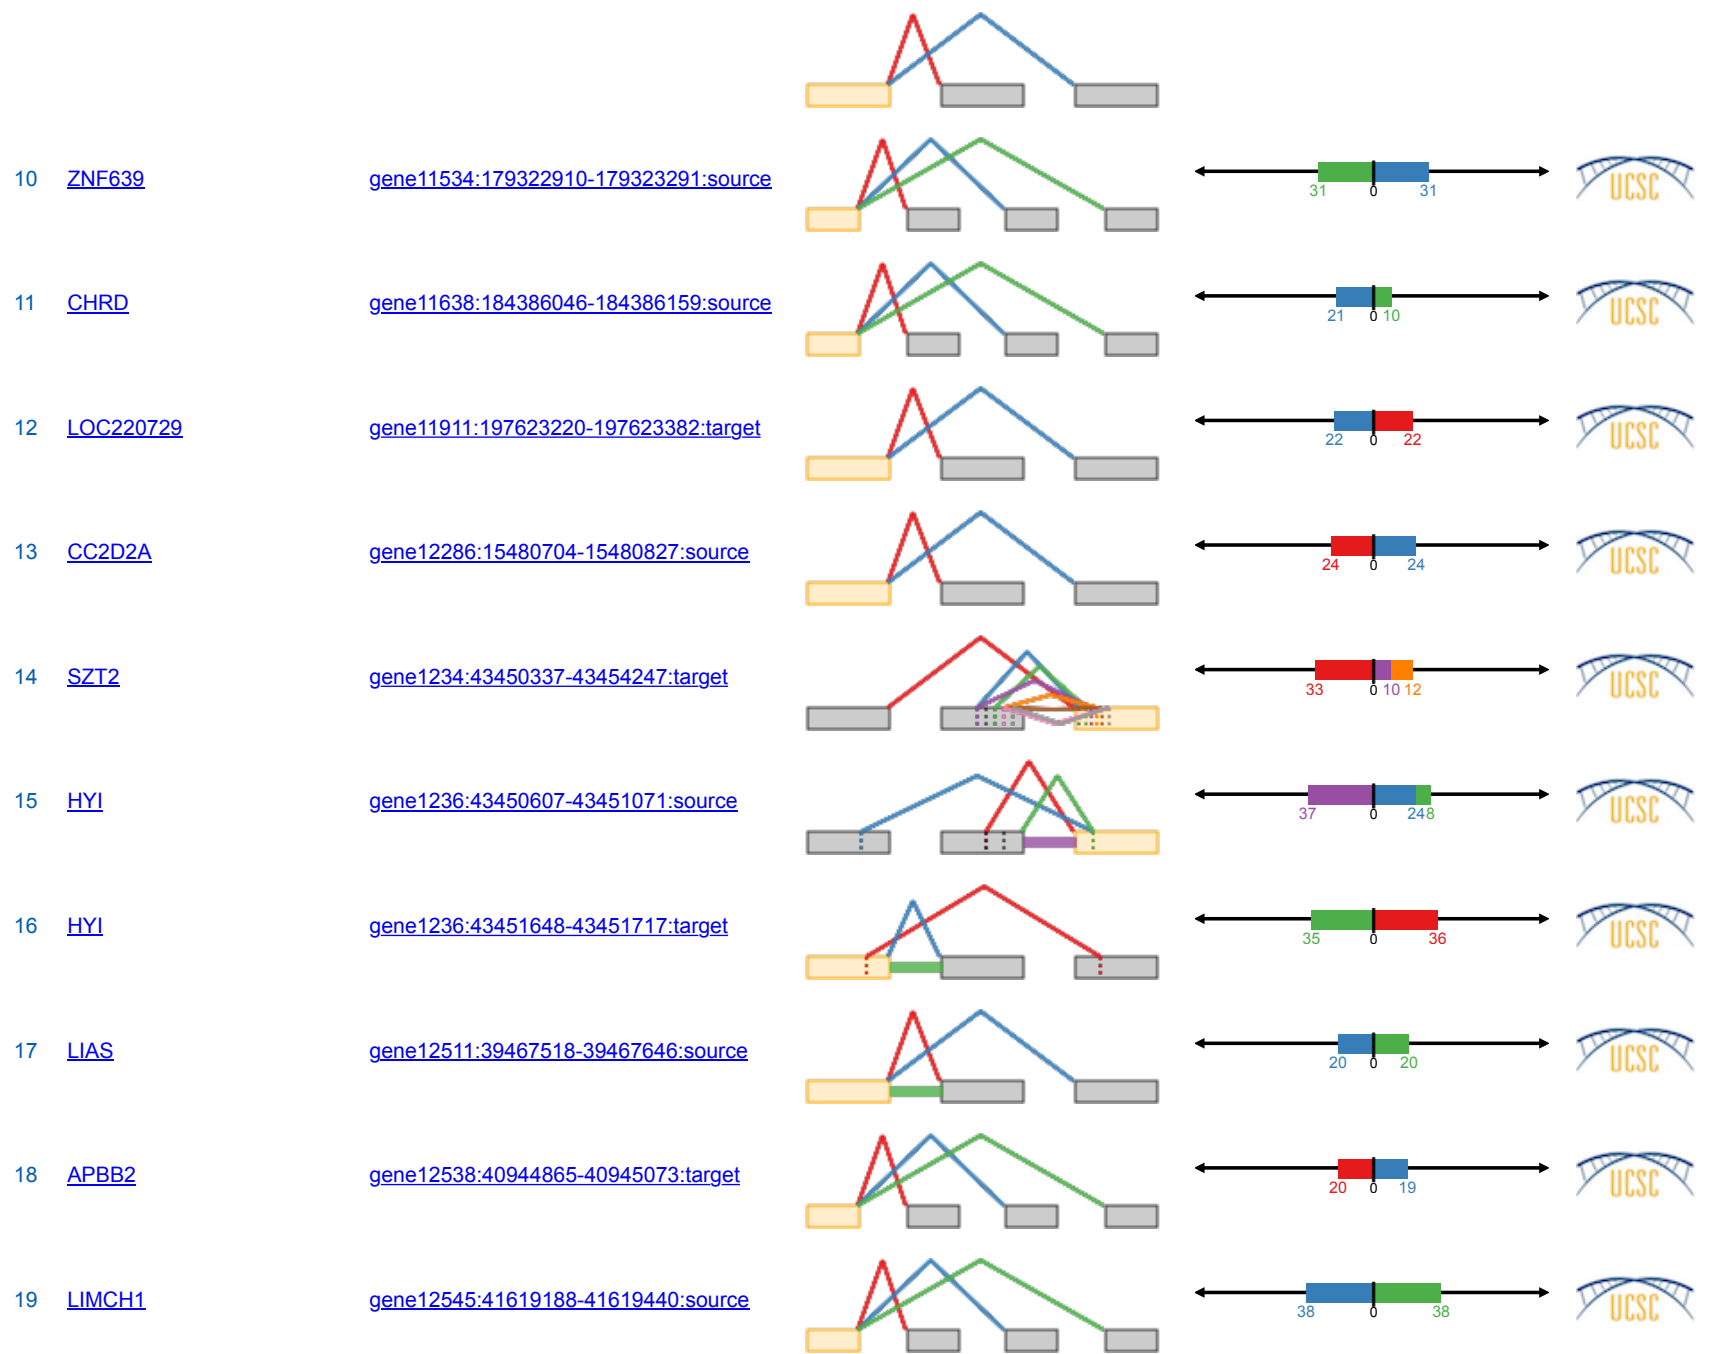

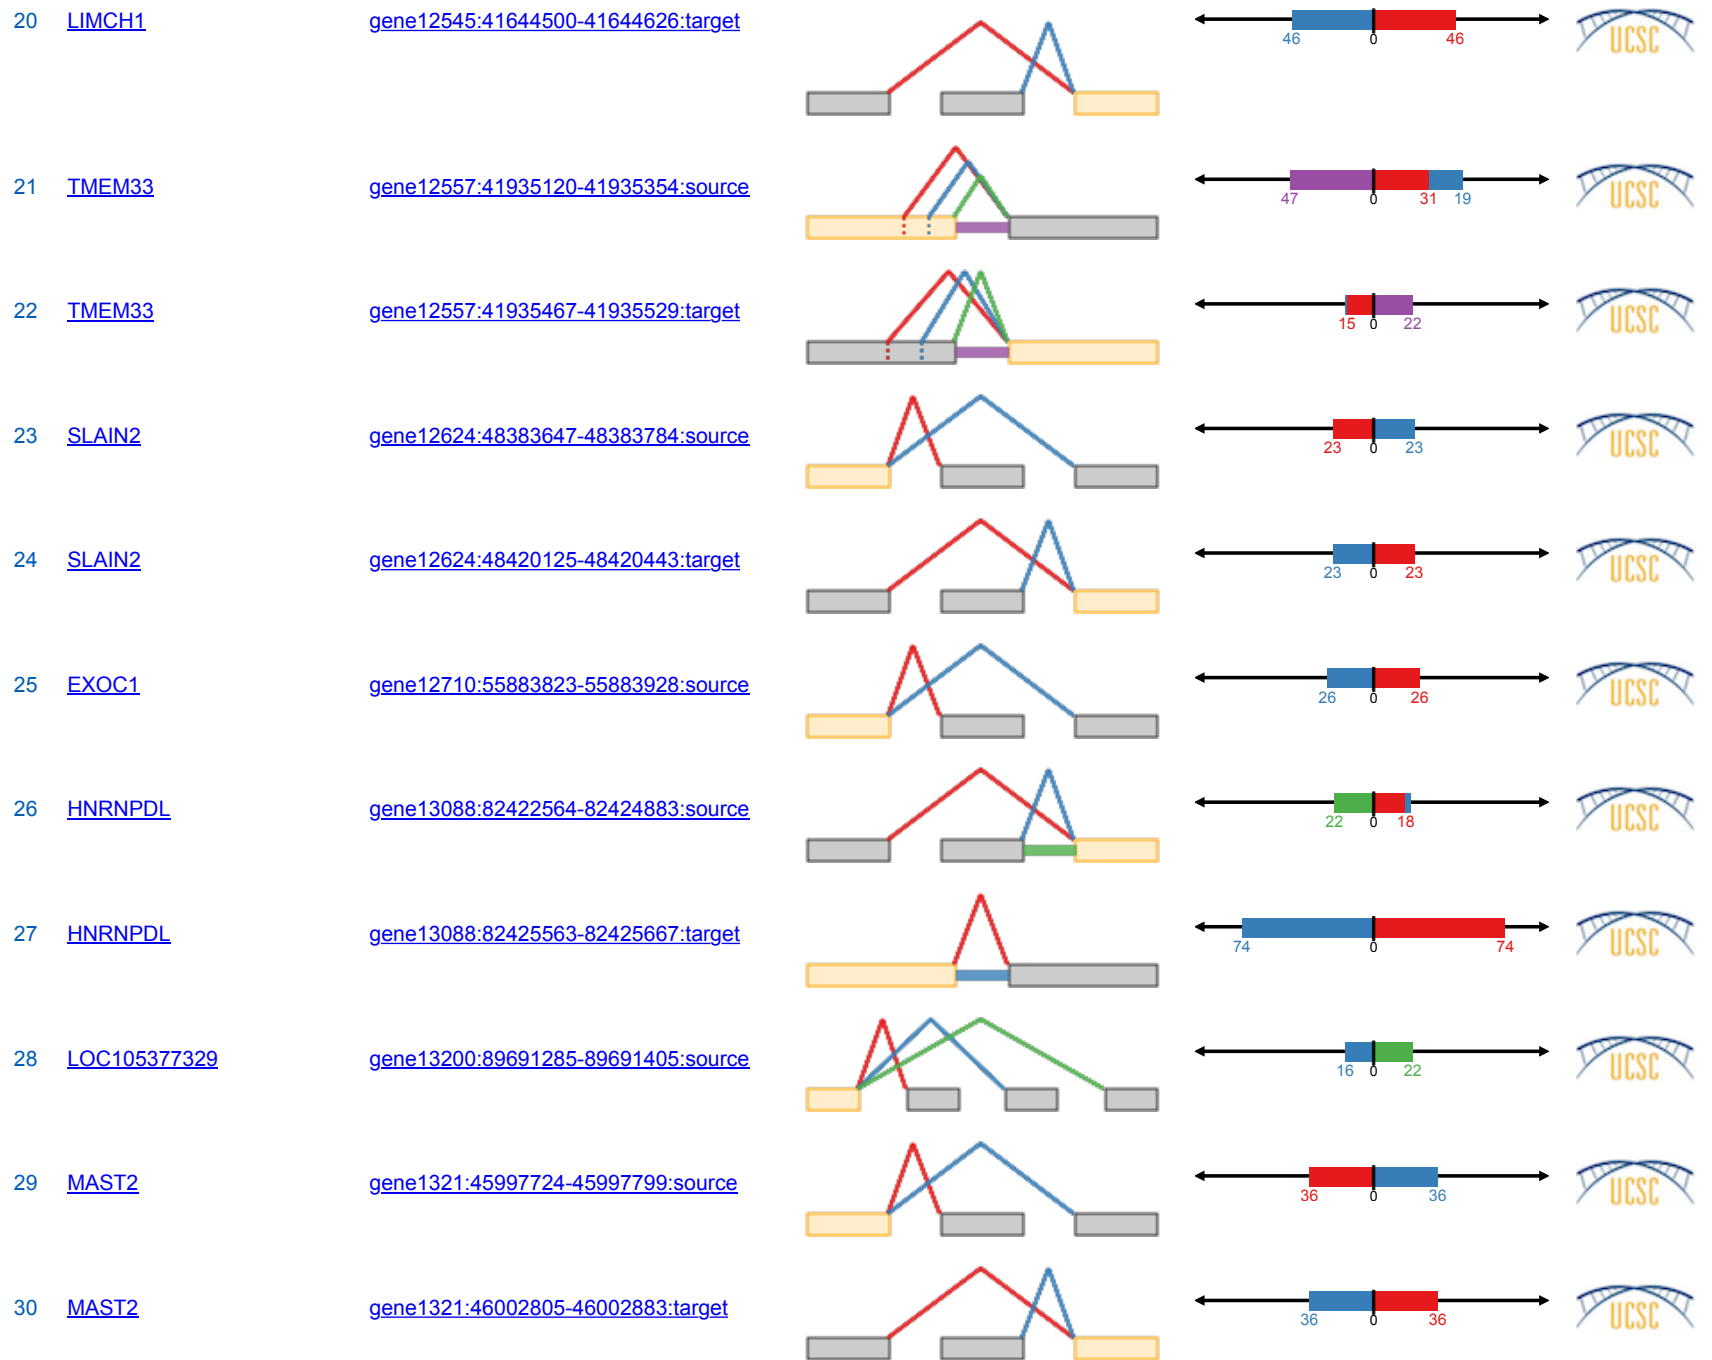

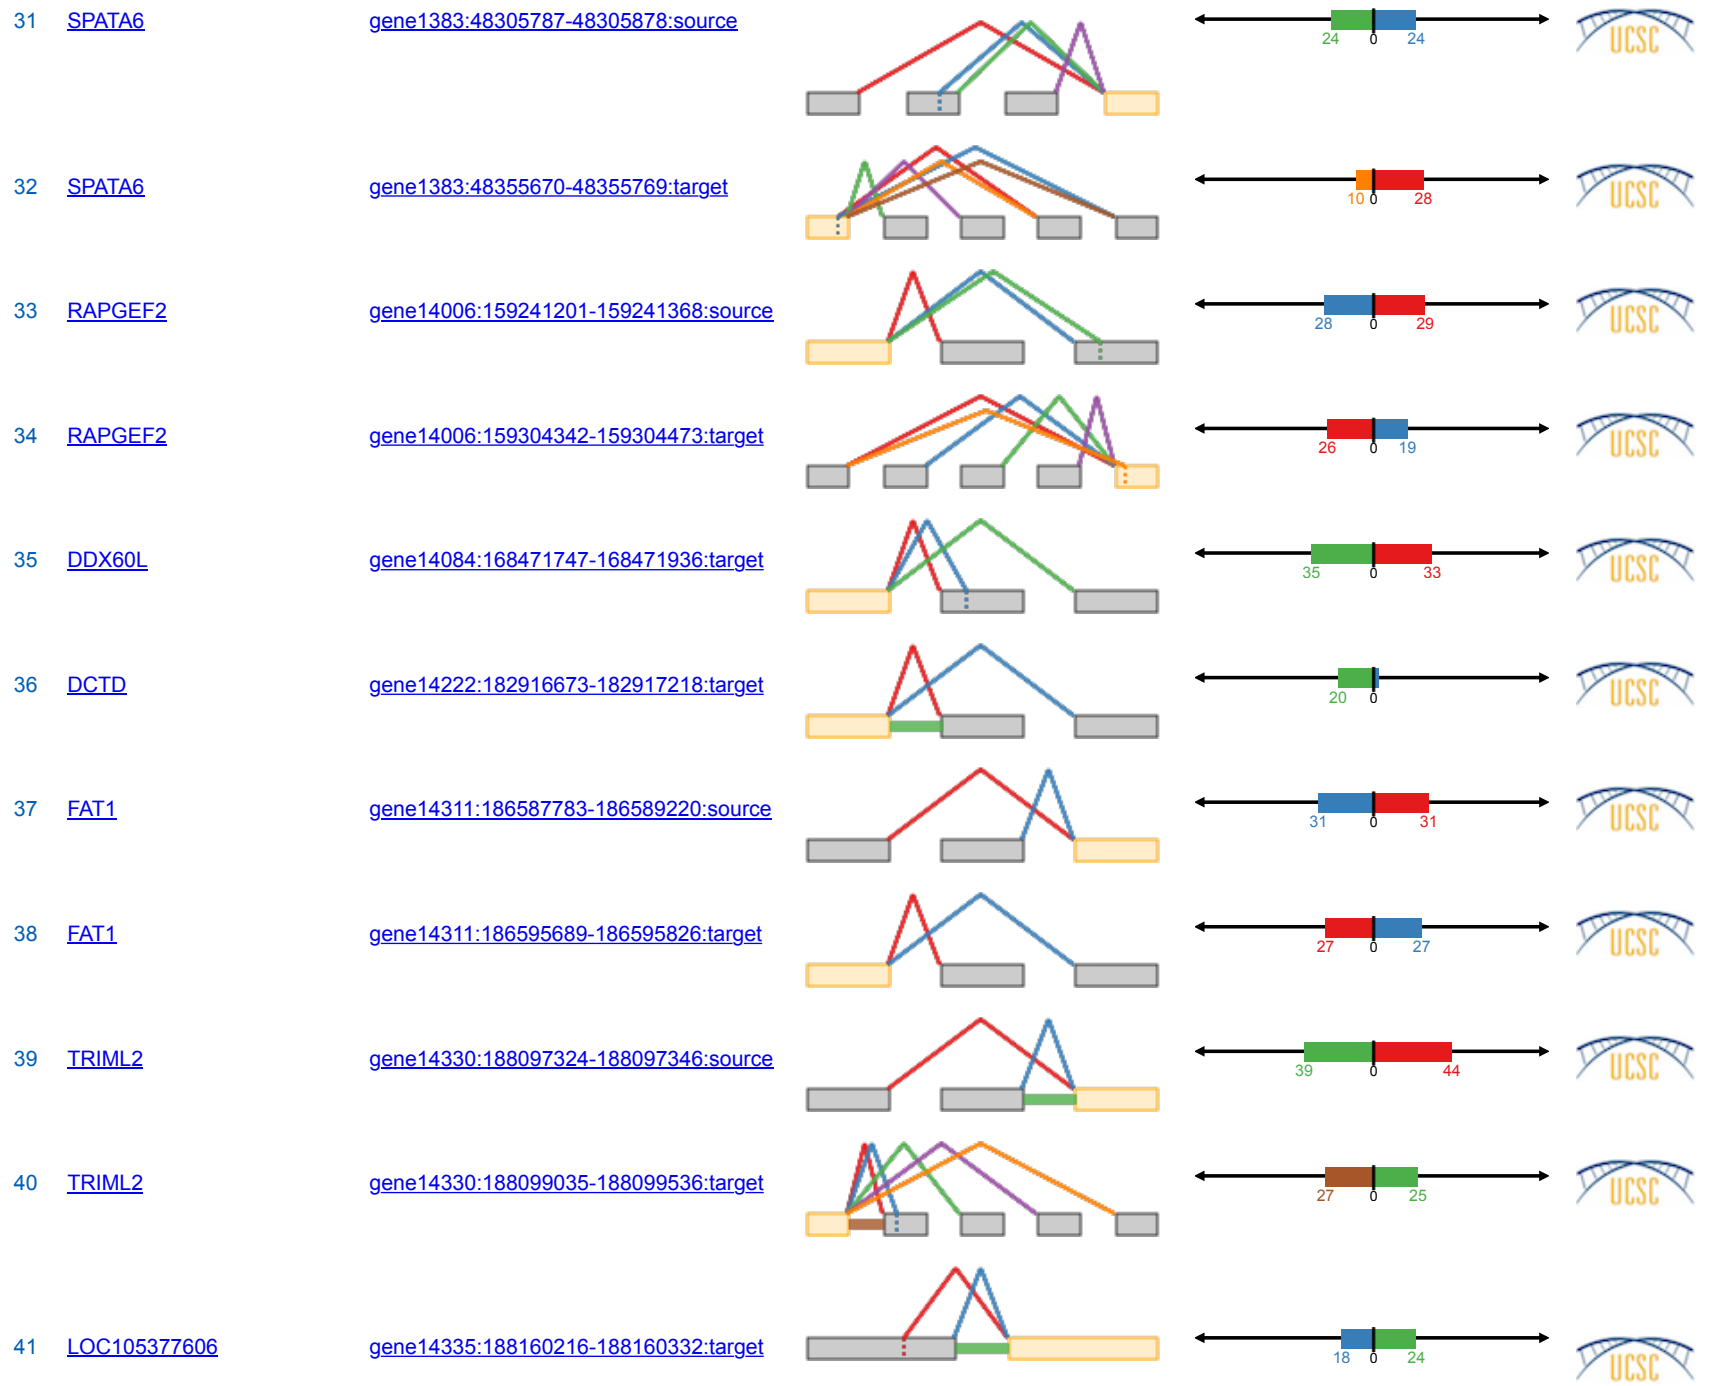

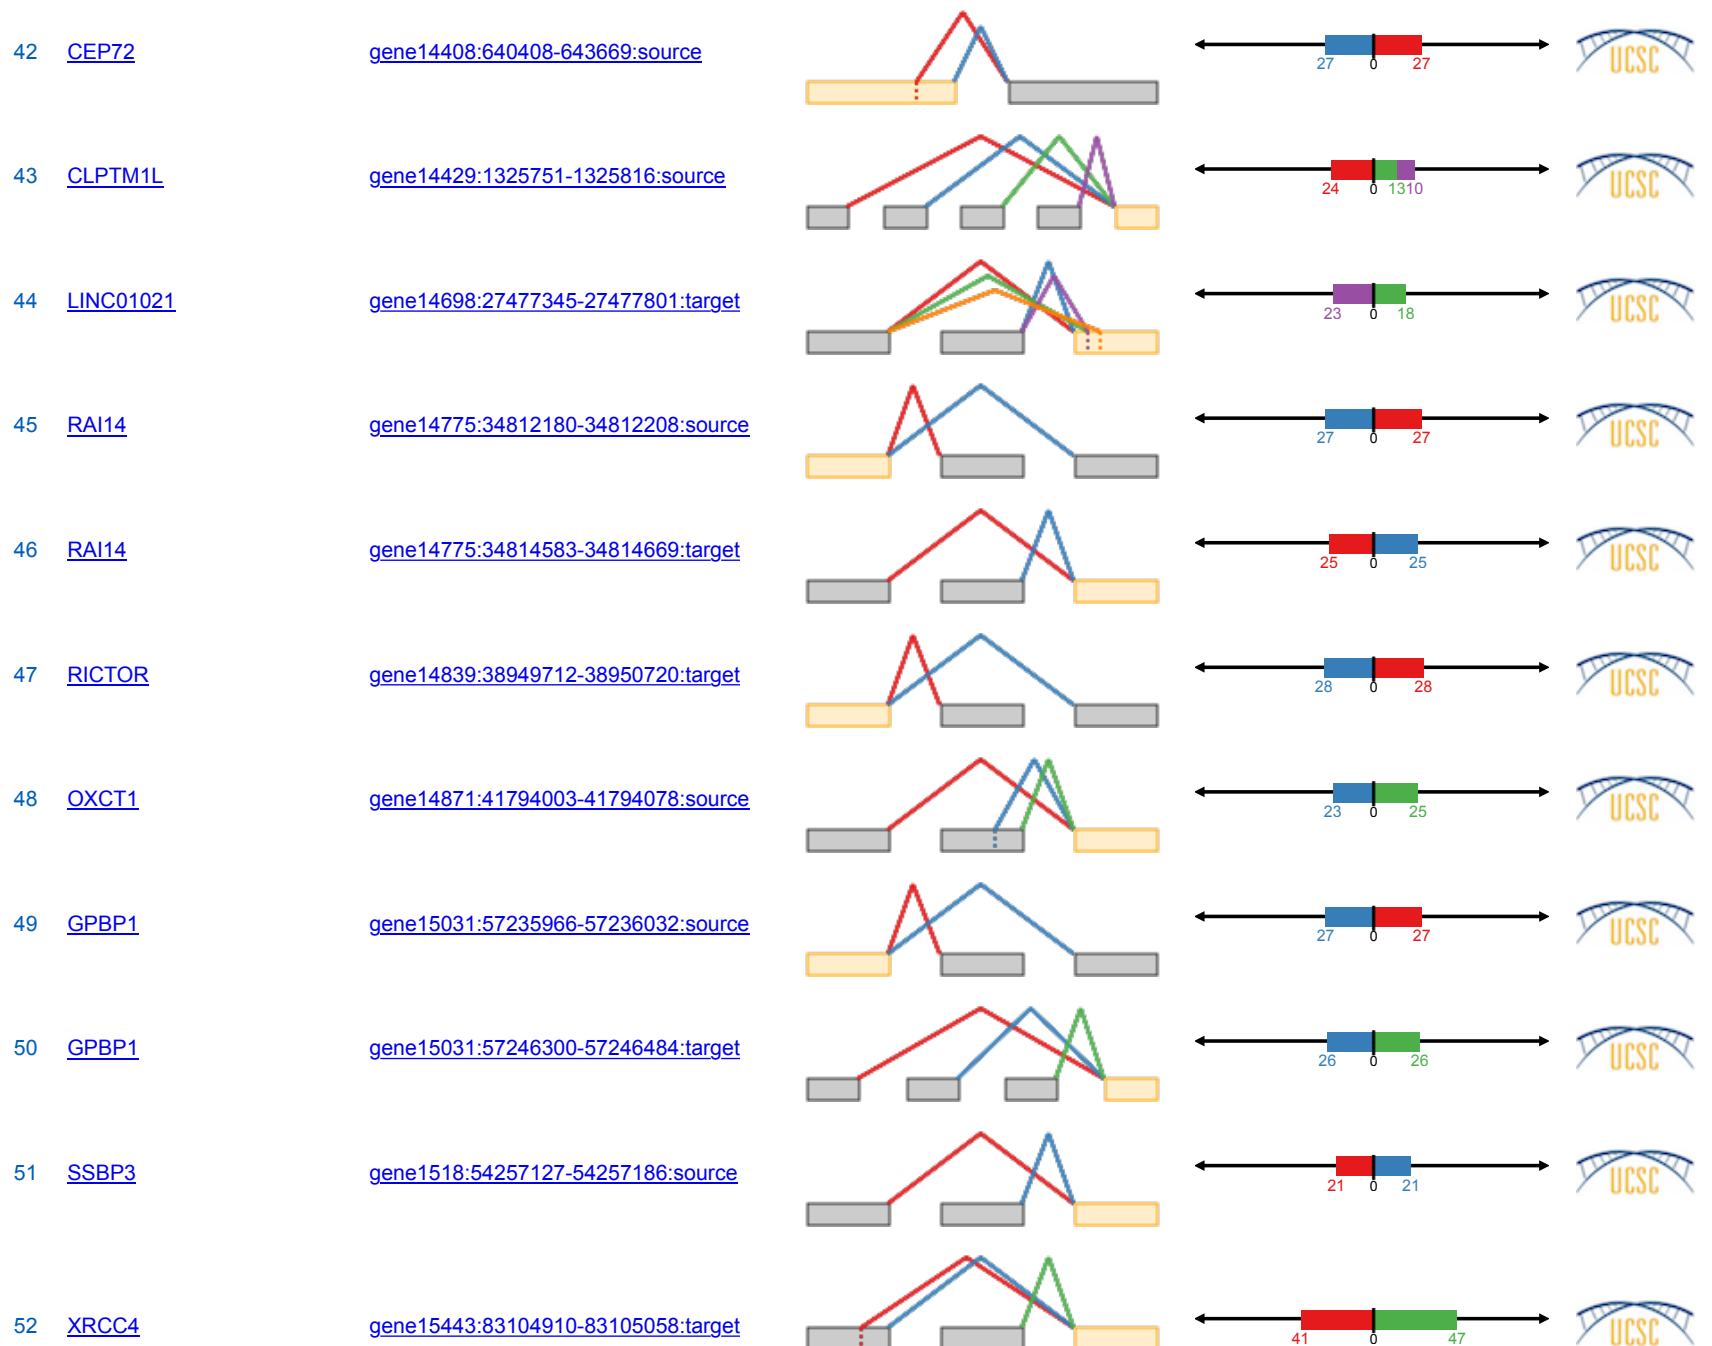

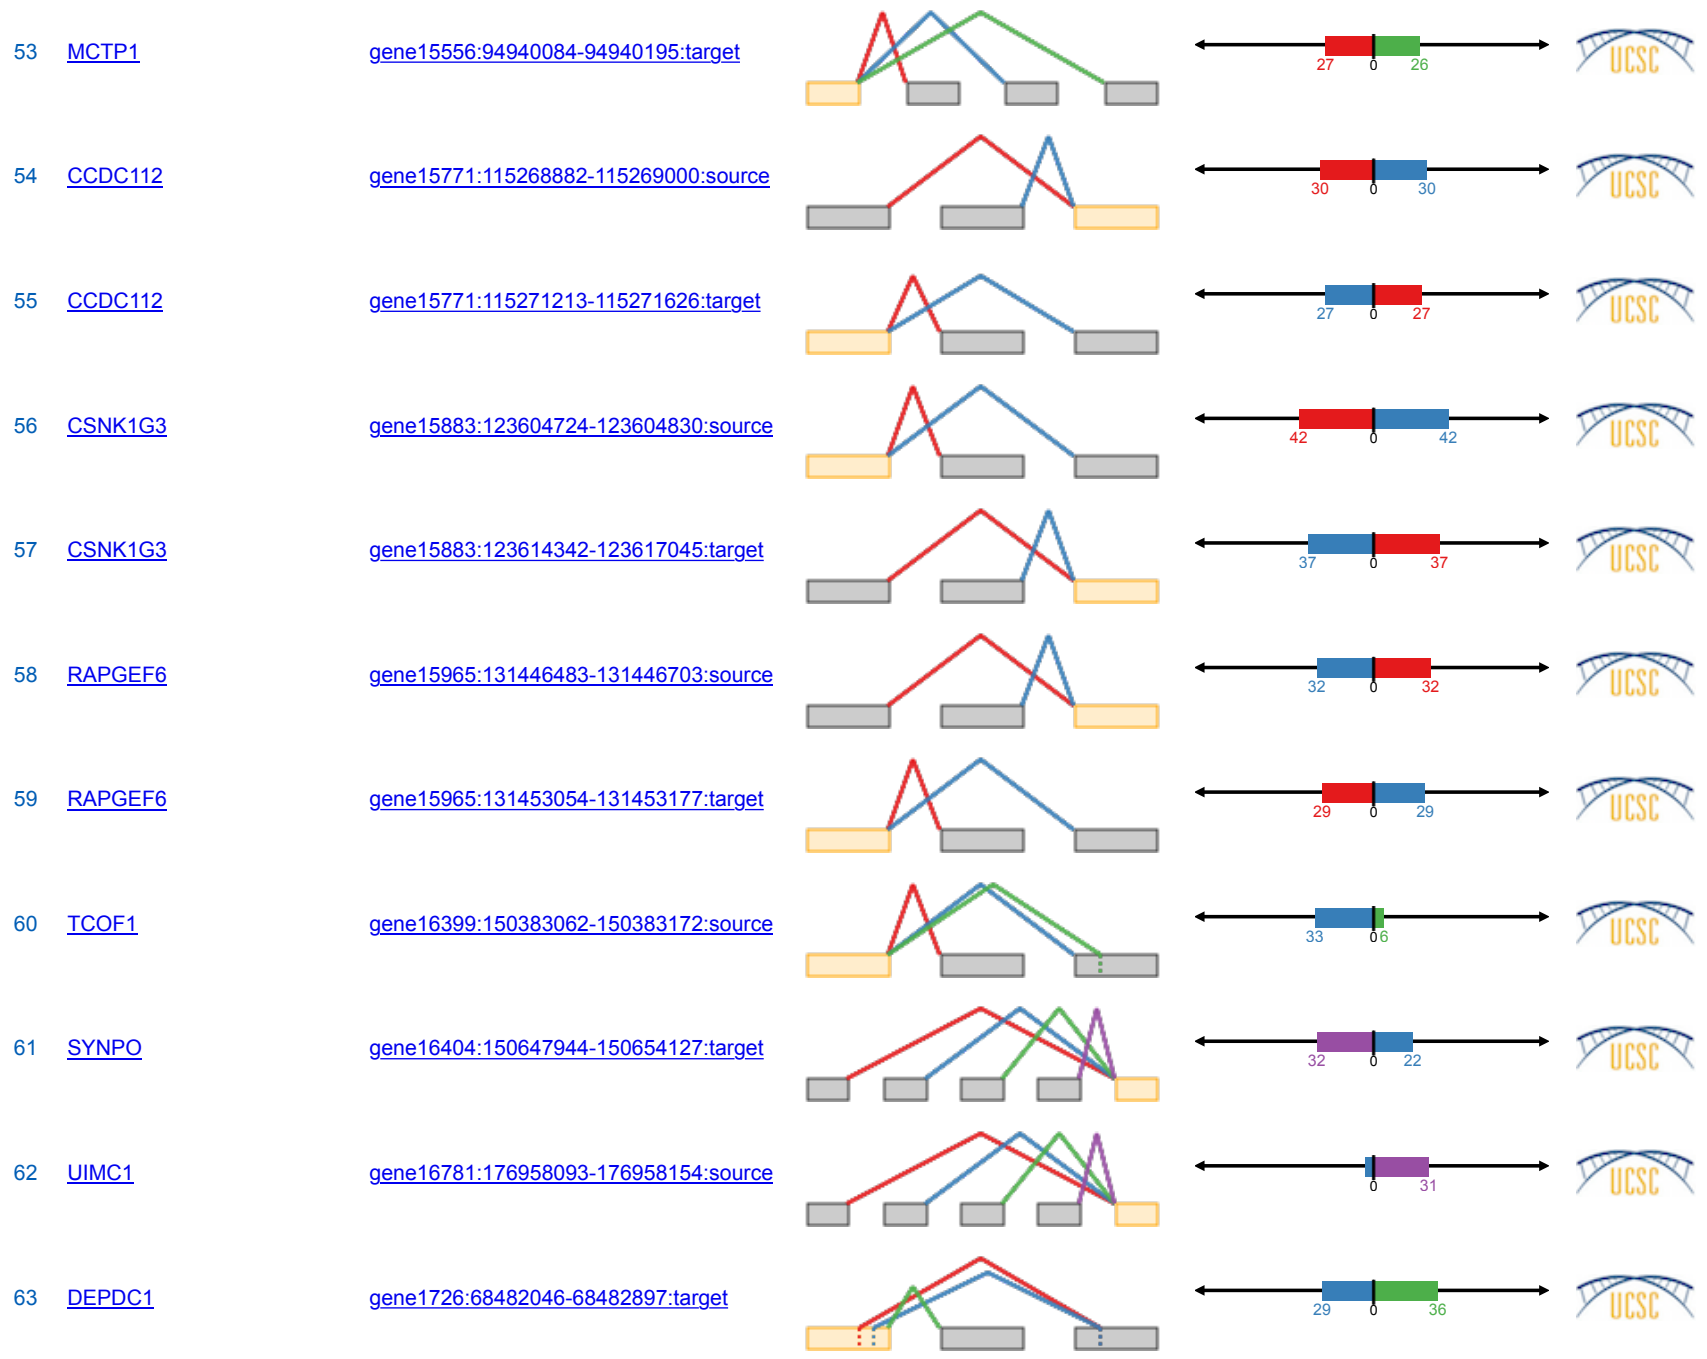

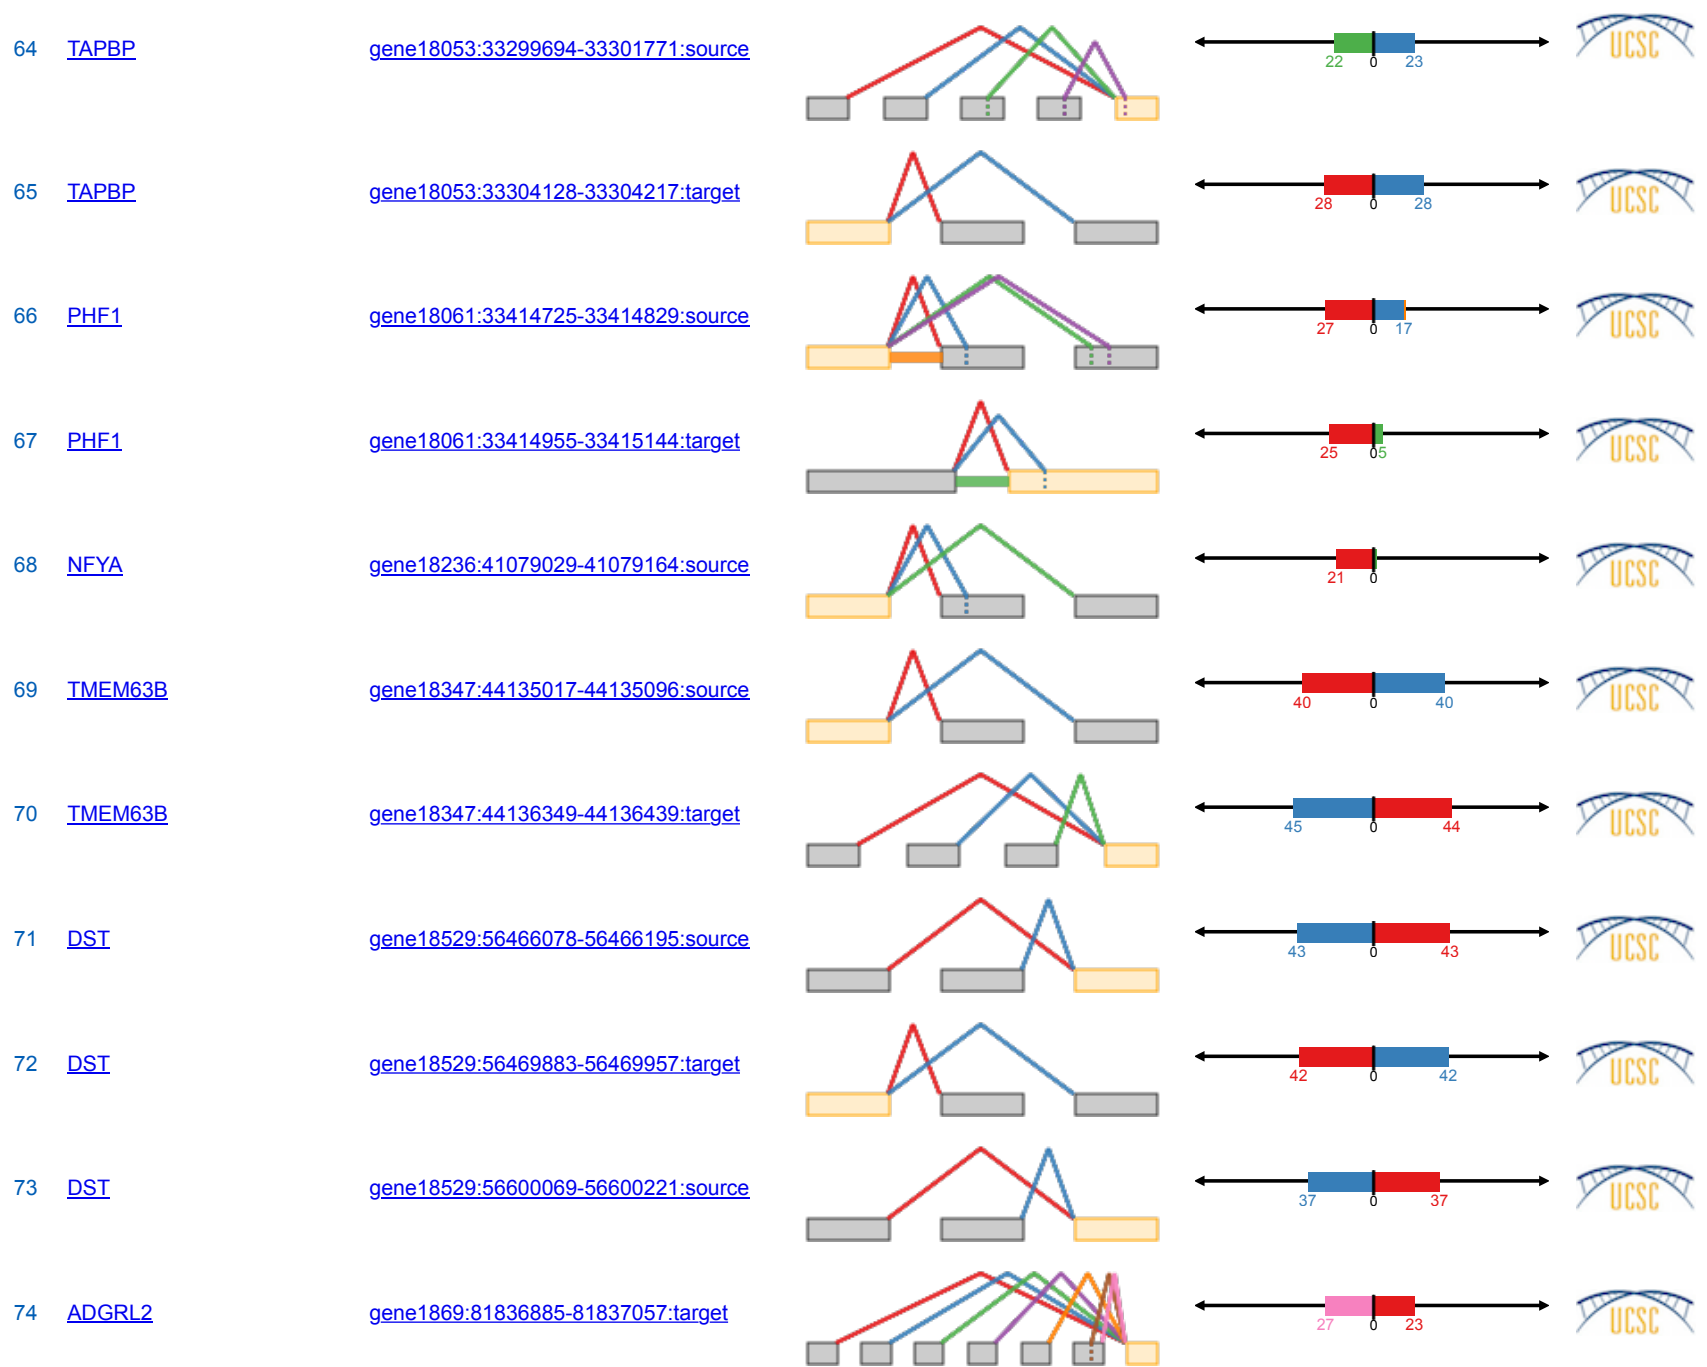

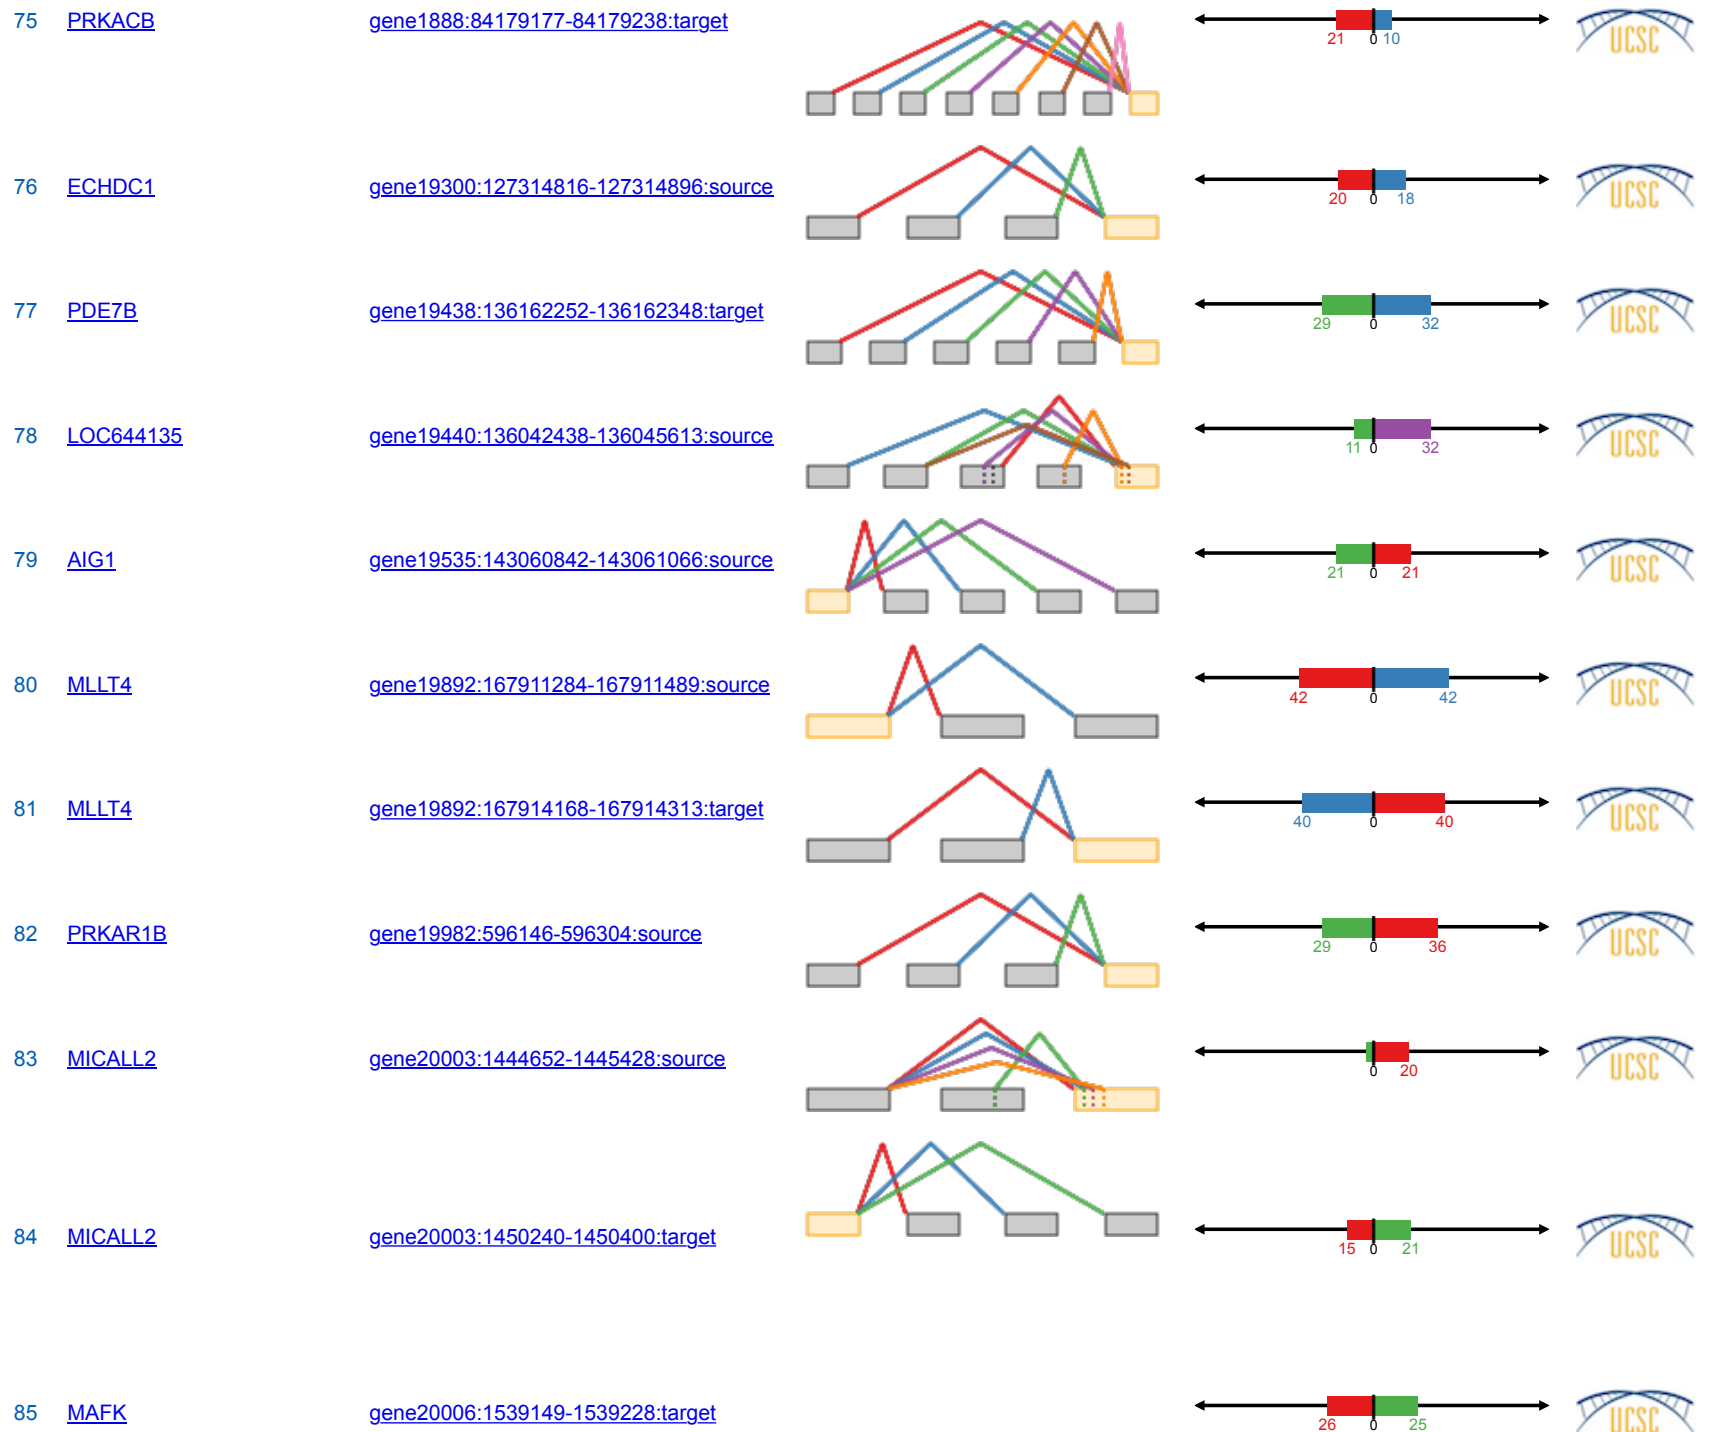



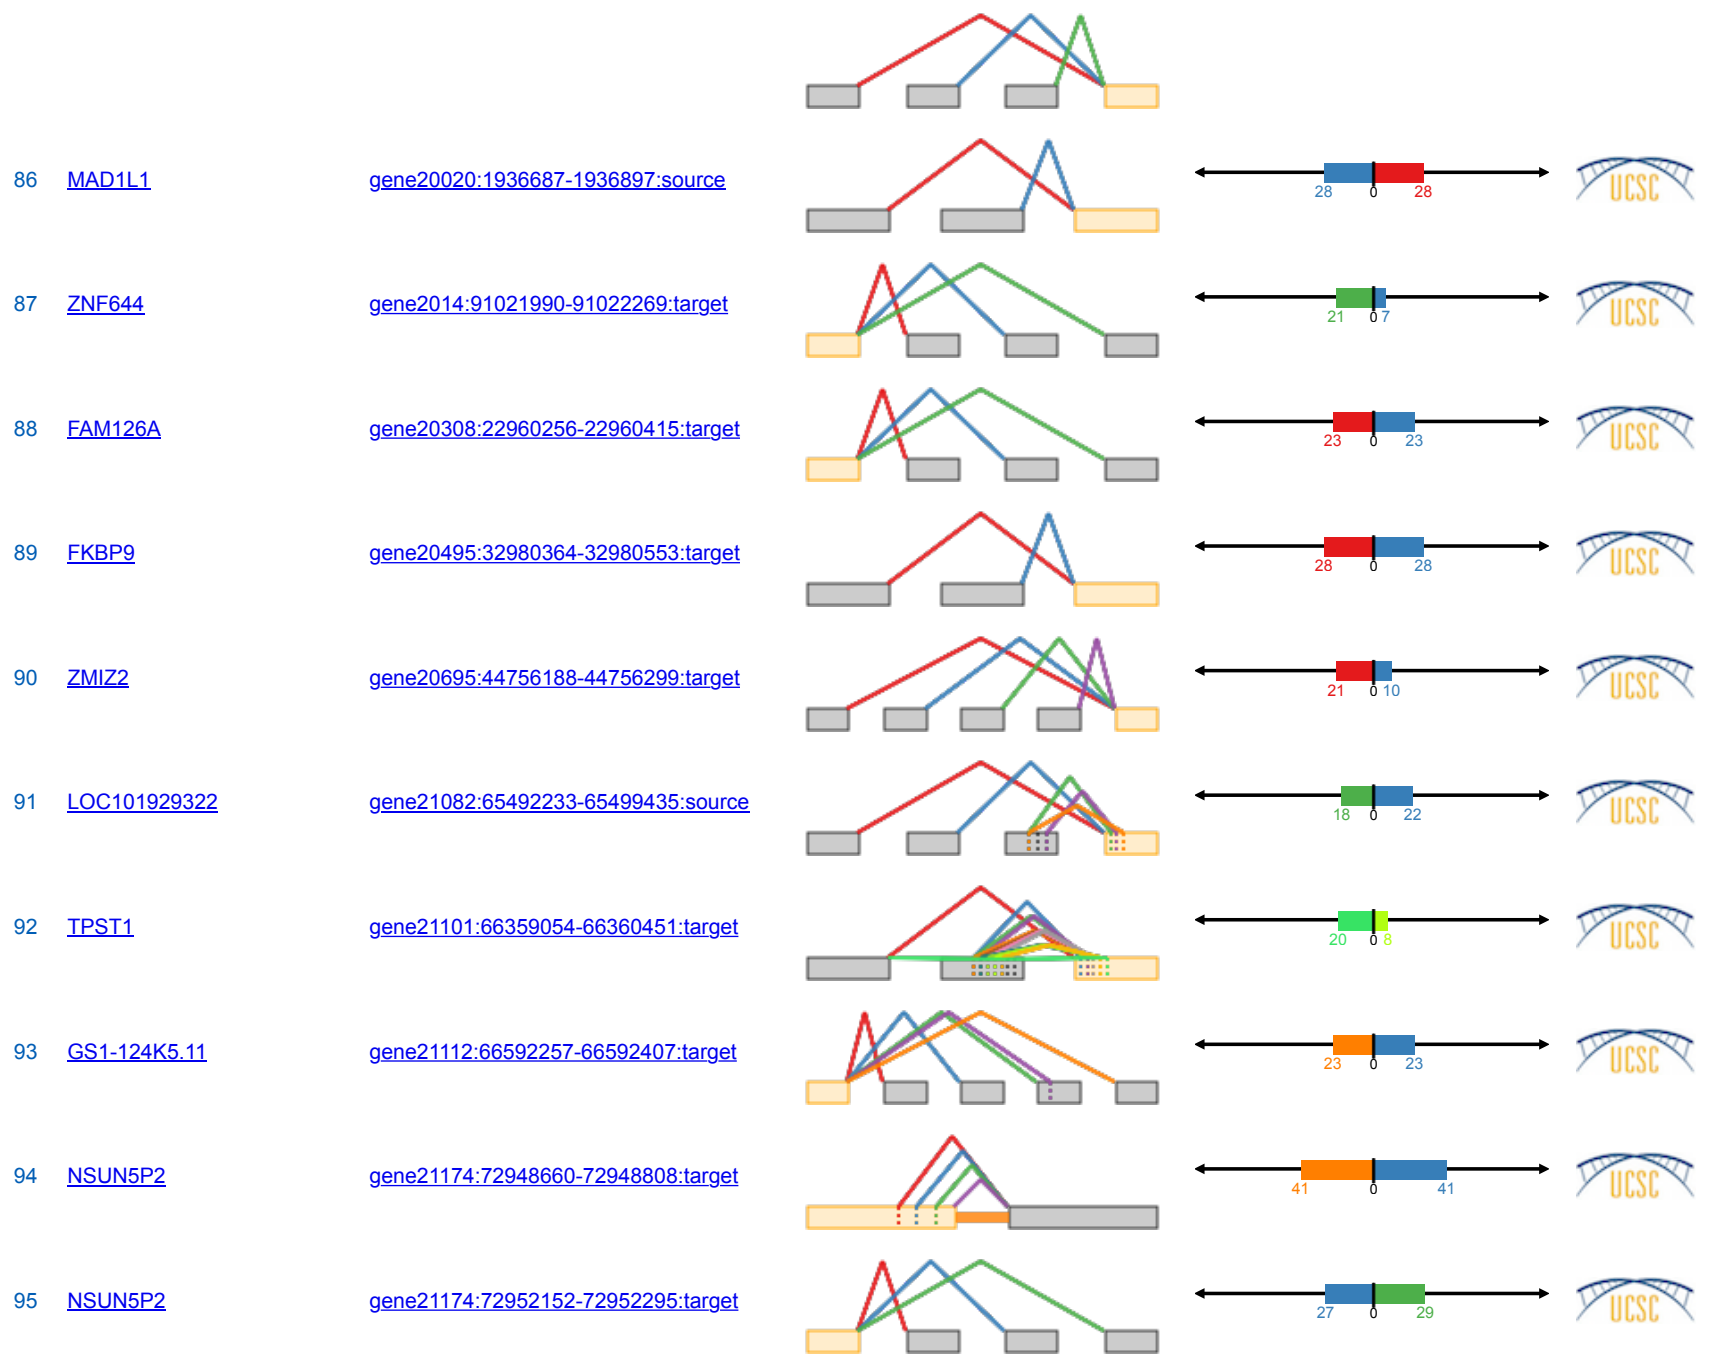

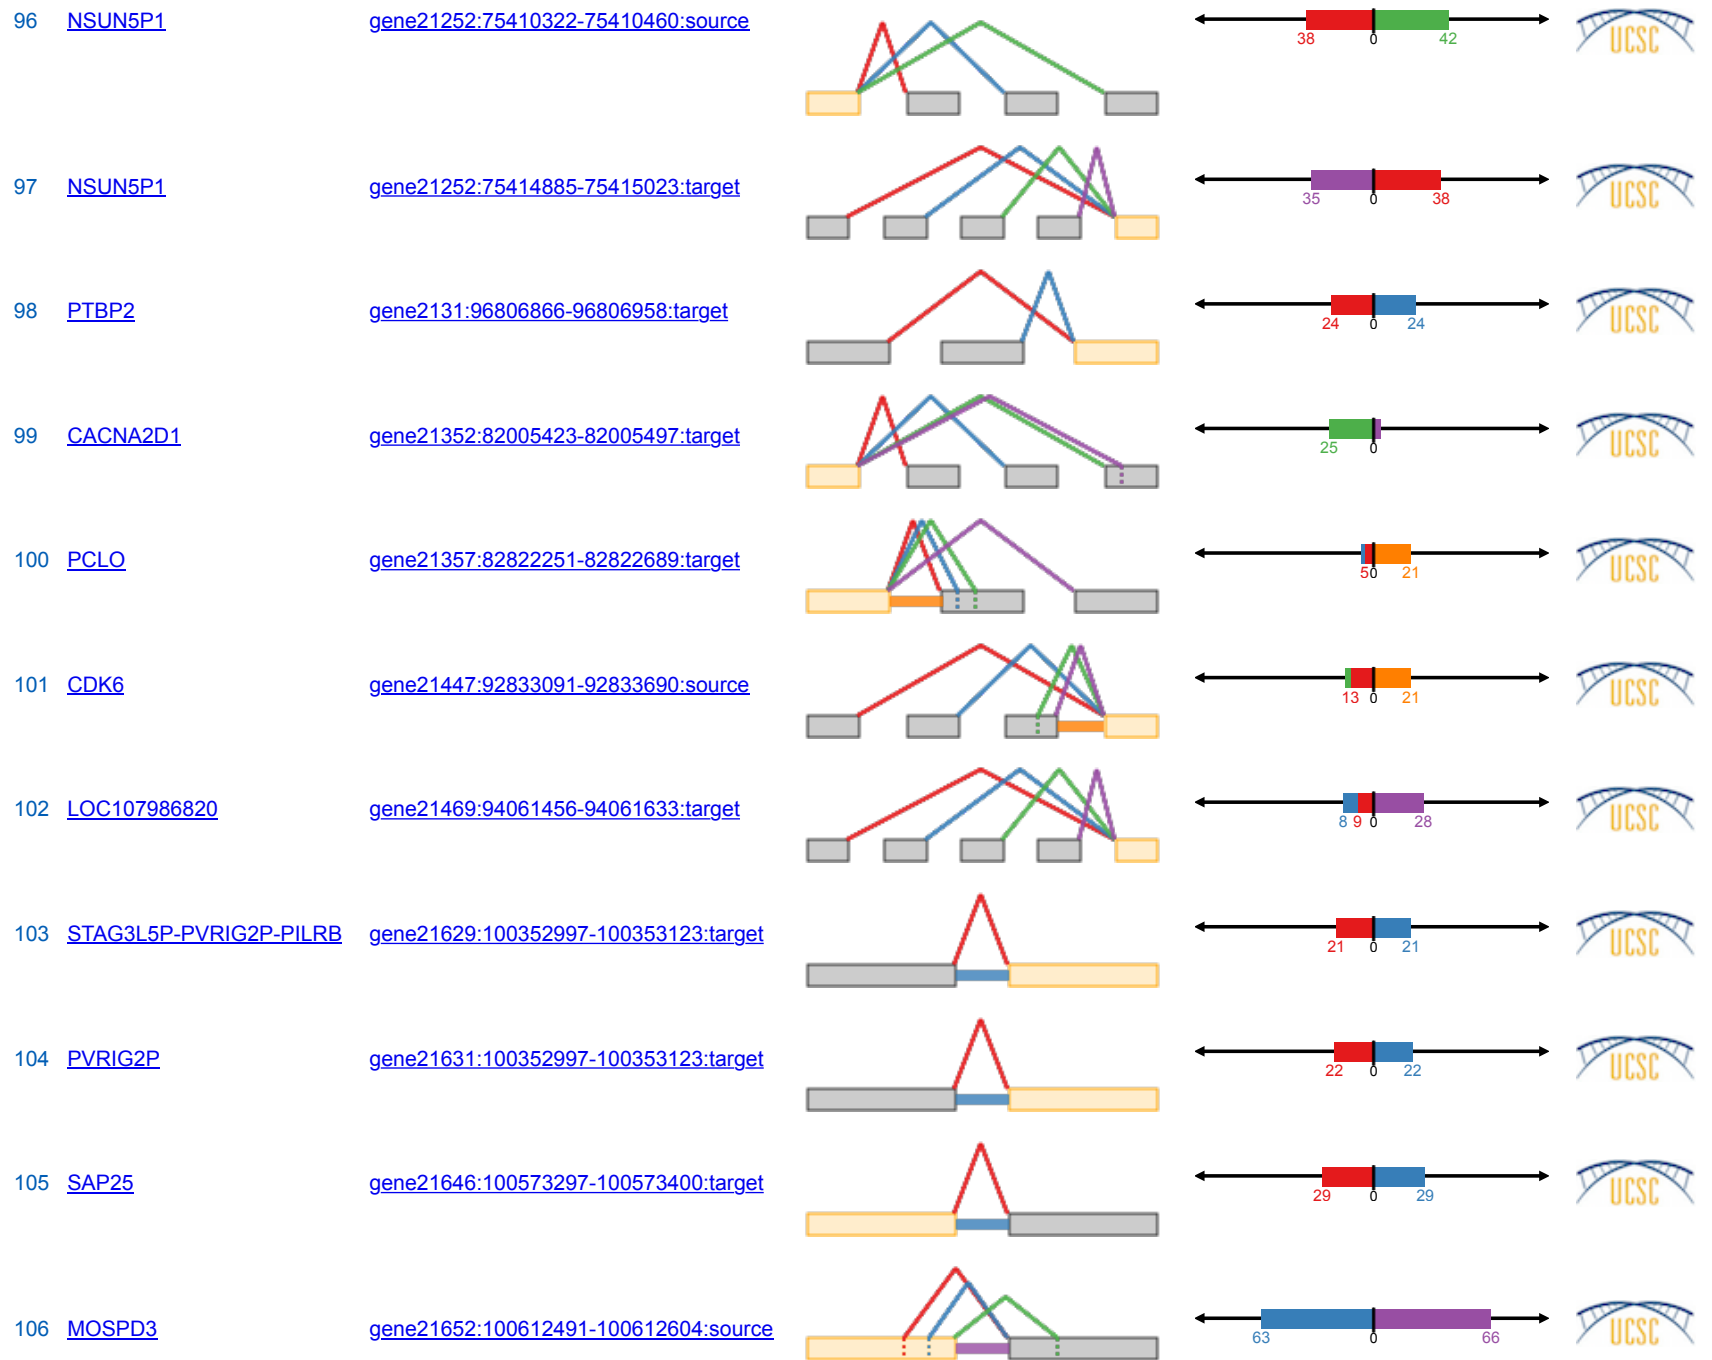

|     |                         |                                                      |  |  |  |
|-----|-------------------------|------------------------------------------------------|--|--|--|
| 107 | <a href="#">ATXN7L1</a> | <a href="#">gene21775:105875812-105875880:target</a> |  |  |  |
| 108 | <a href="#">MDFIC</a>   | <a href="#">gene21865:114922927-114923127:source</a> |  |  |  |
| 109 | <a href="#">ATG9B</a>   | <a href="#">gene22599:151012209-151013408:source</a> |  |  |  |
| 110 | <a href="#">PLEKHG5</a> | <a href="#">gene226:6471488-6471637:target</a>       |  |  |  |
| 111 | <a href="#">CSF1</a>    | <a href="#">gene2309:109925147-109925202:source</a>  |  |  |  |
| 112 | <a href="#">HMBOX1</a>  | <a href="#">gene23307:29045361-29045443:source</a>   |  |  |  |
| 113 | <a href="#">HMBOX1</a>  | <a href="#">gene23307:29047358-29047453:target</a>   |  |  |  |
| 114 | <a href="#">UBXN8</a>   | <a href="#">gene23344:30744165-30744277:source</a>   |  |  |  |
| 115 | <a href="#">RP1</a>     | <a href="#">gene23653:54558760-54559320:target</a>   |  |  |  |
| 116 | <a href="#">FBXL6</a>   | <a href="#">gene24843:144356300-144356549:source</a> |  |  |  |
| 117 | <a href="#">TONSL</a>   | <a href="#">gene24853:144440718-144440906:source</a> |  |  |  |

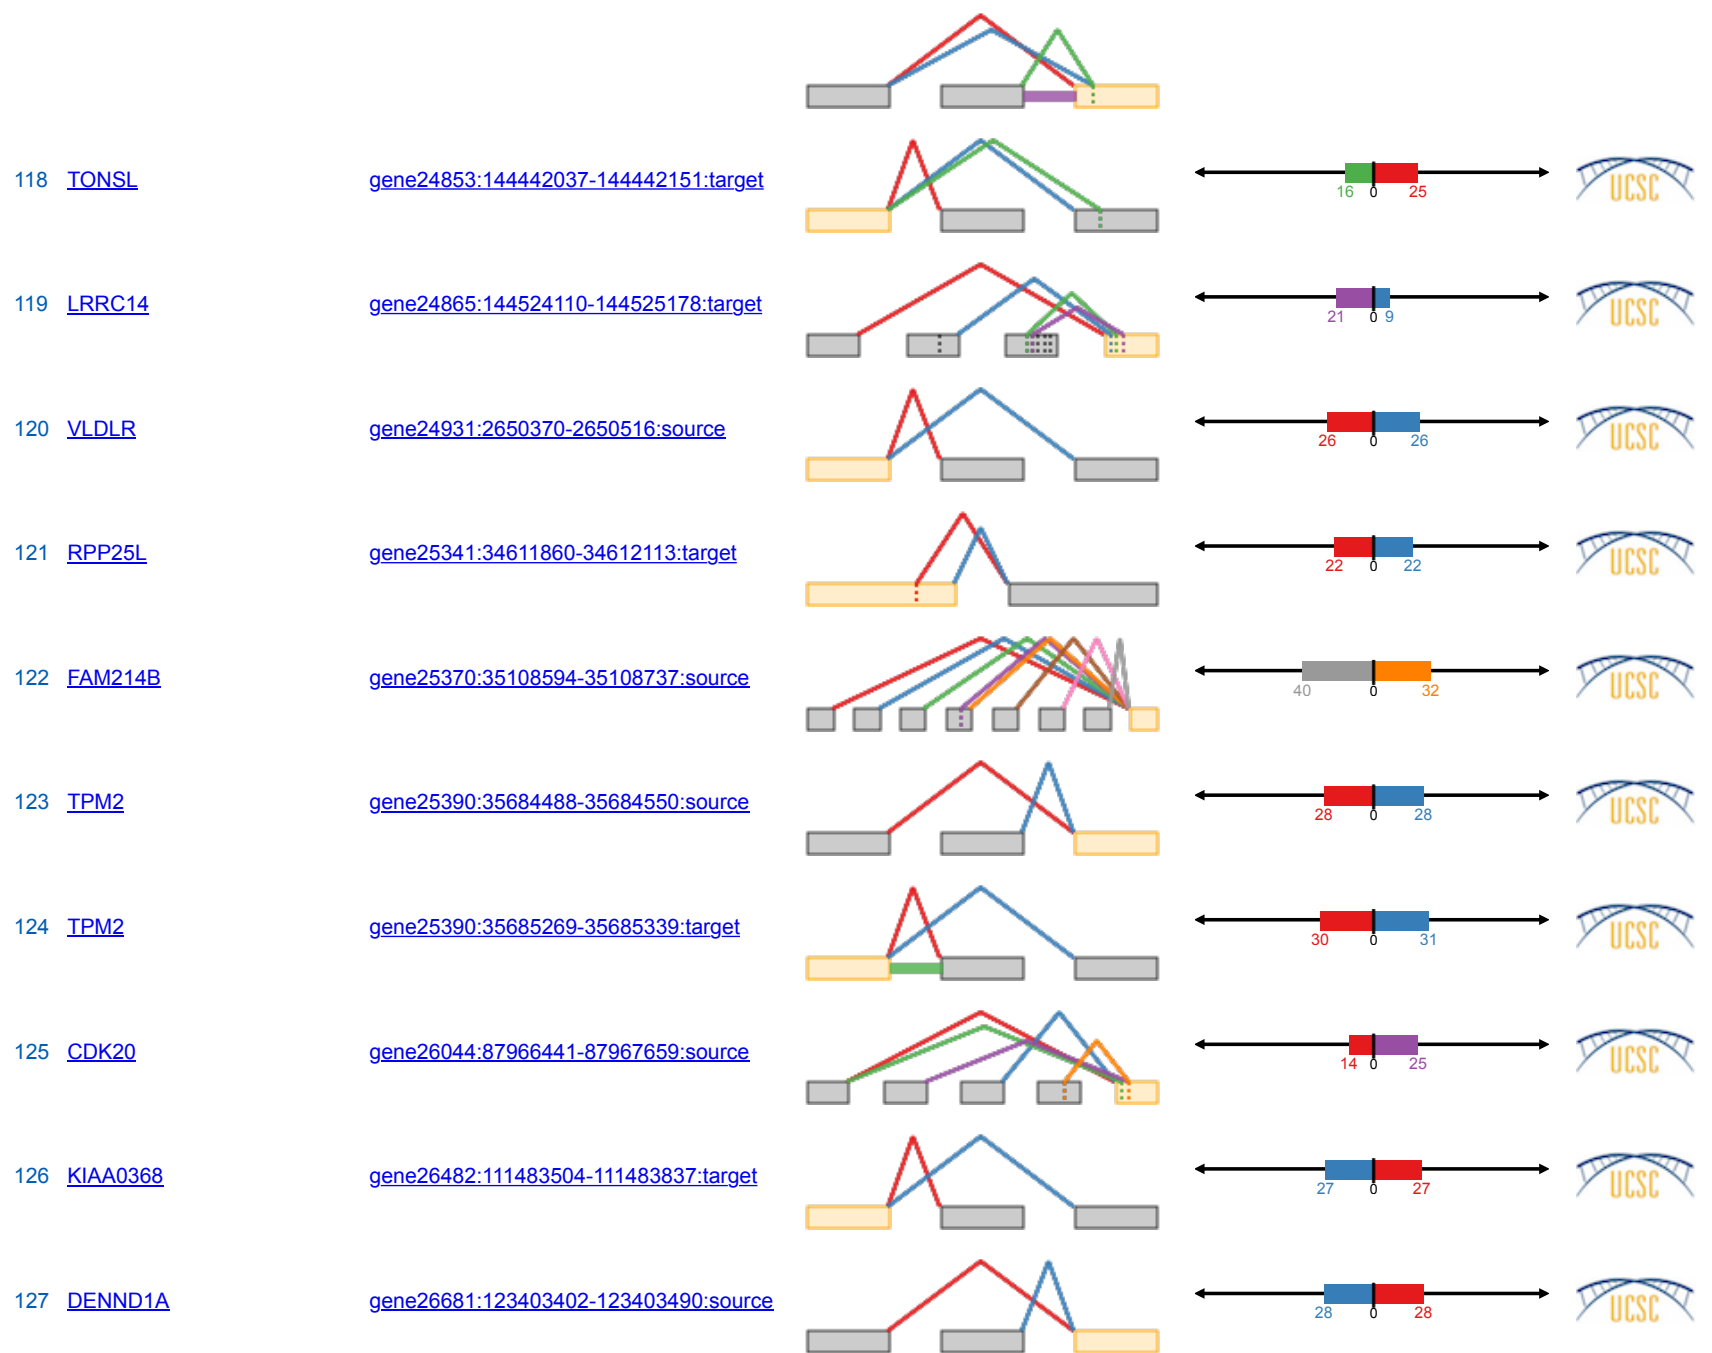

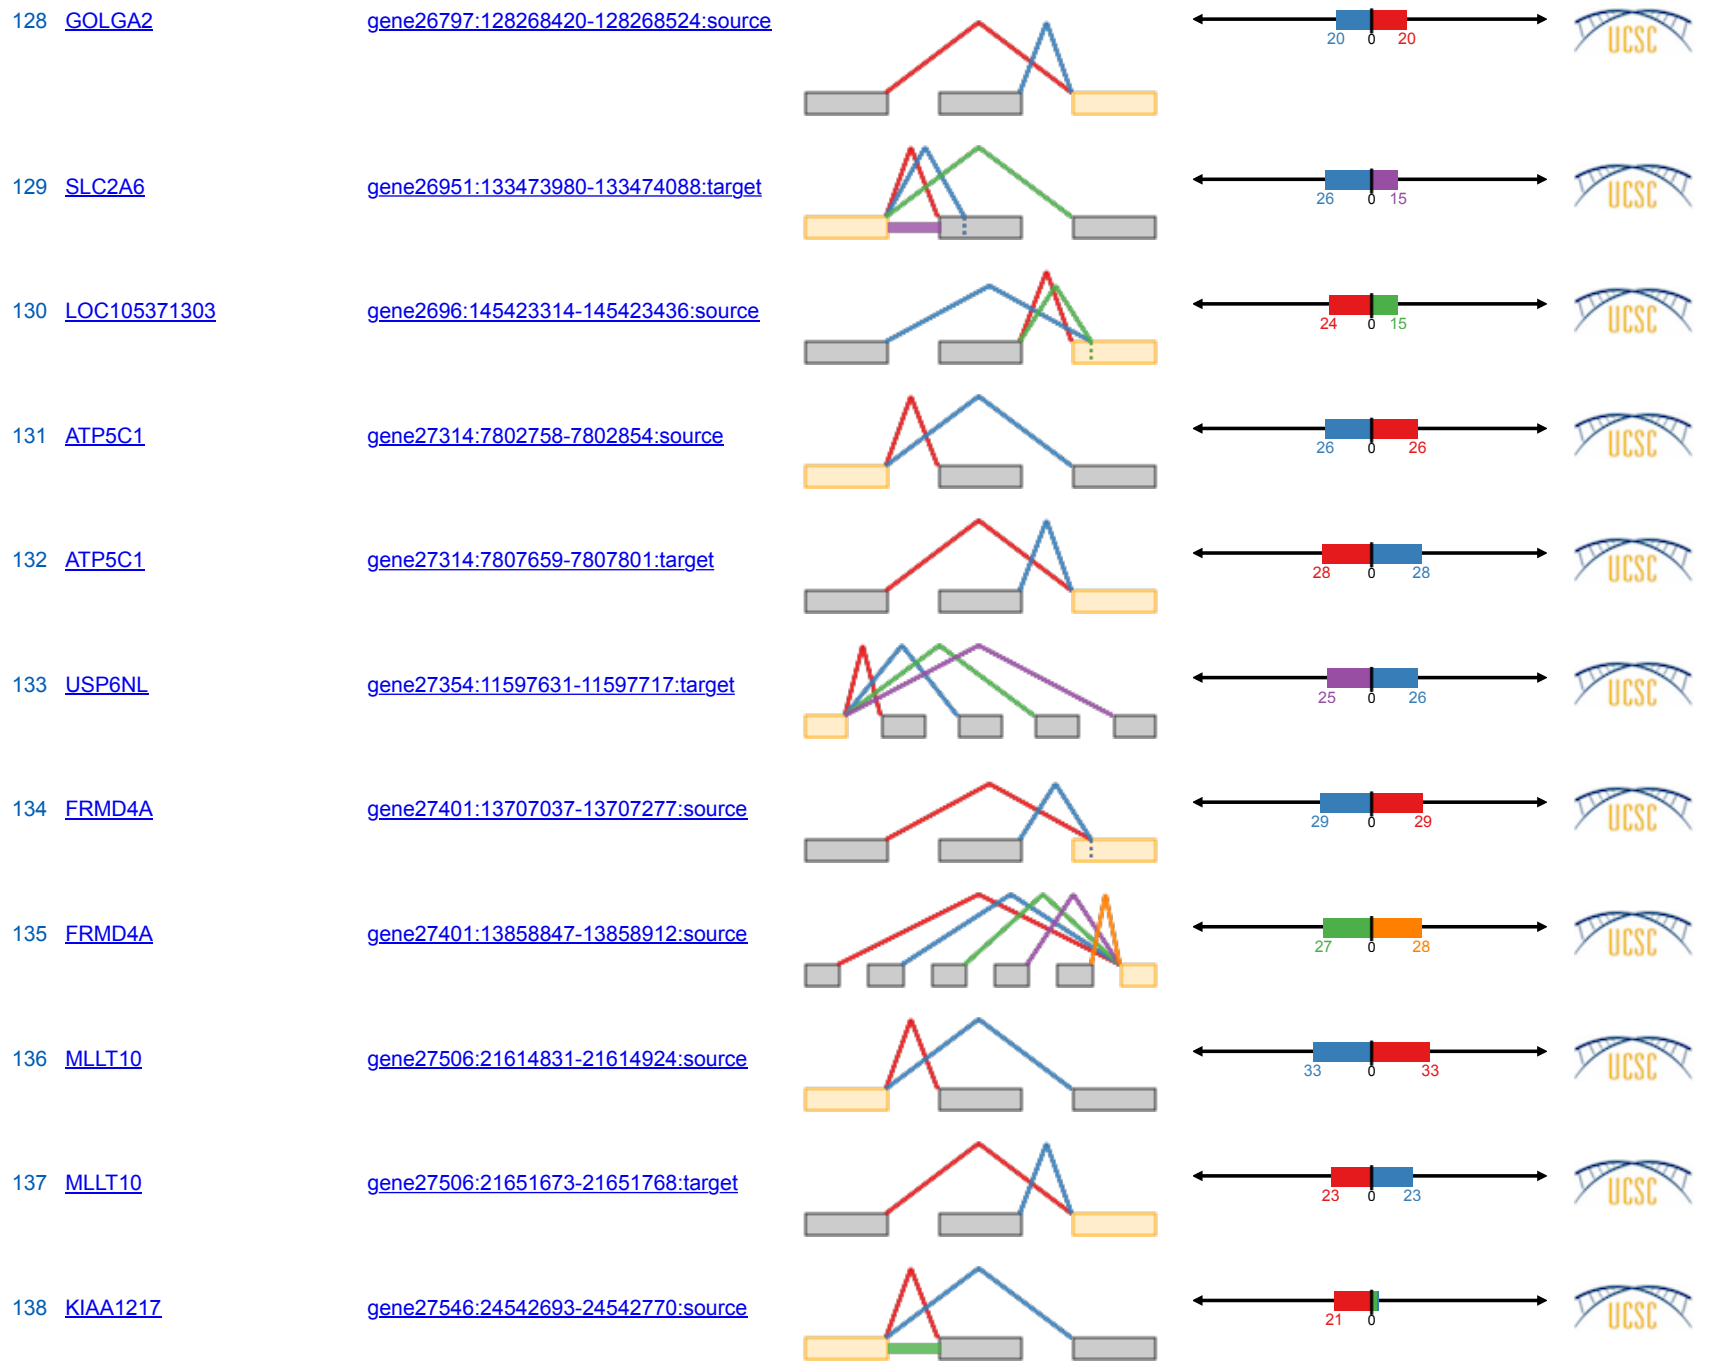

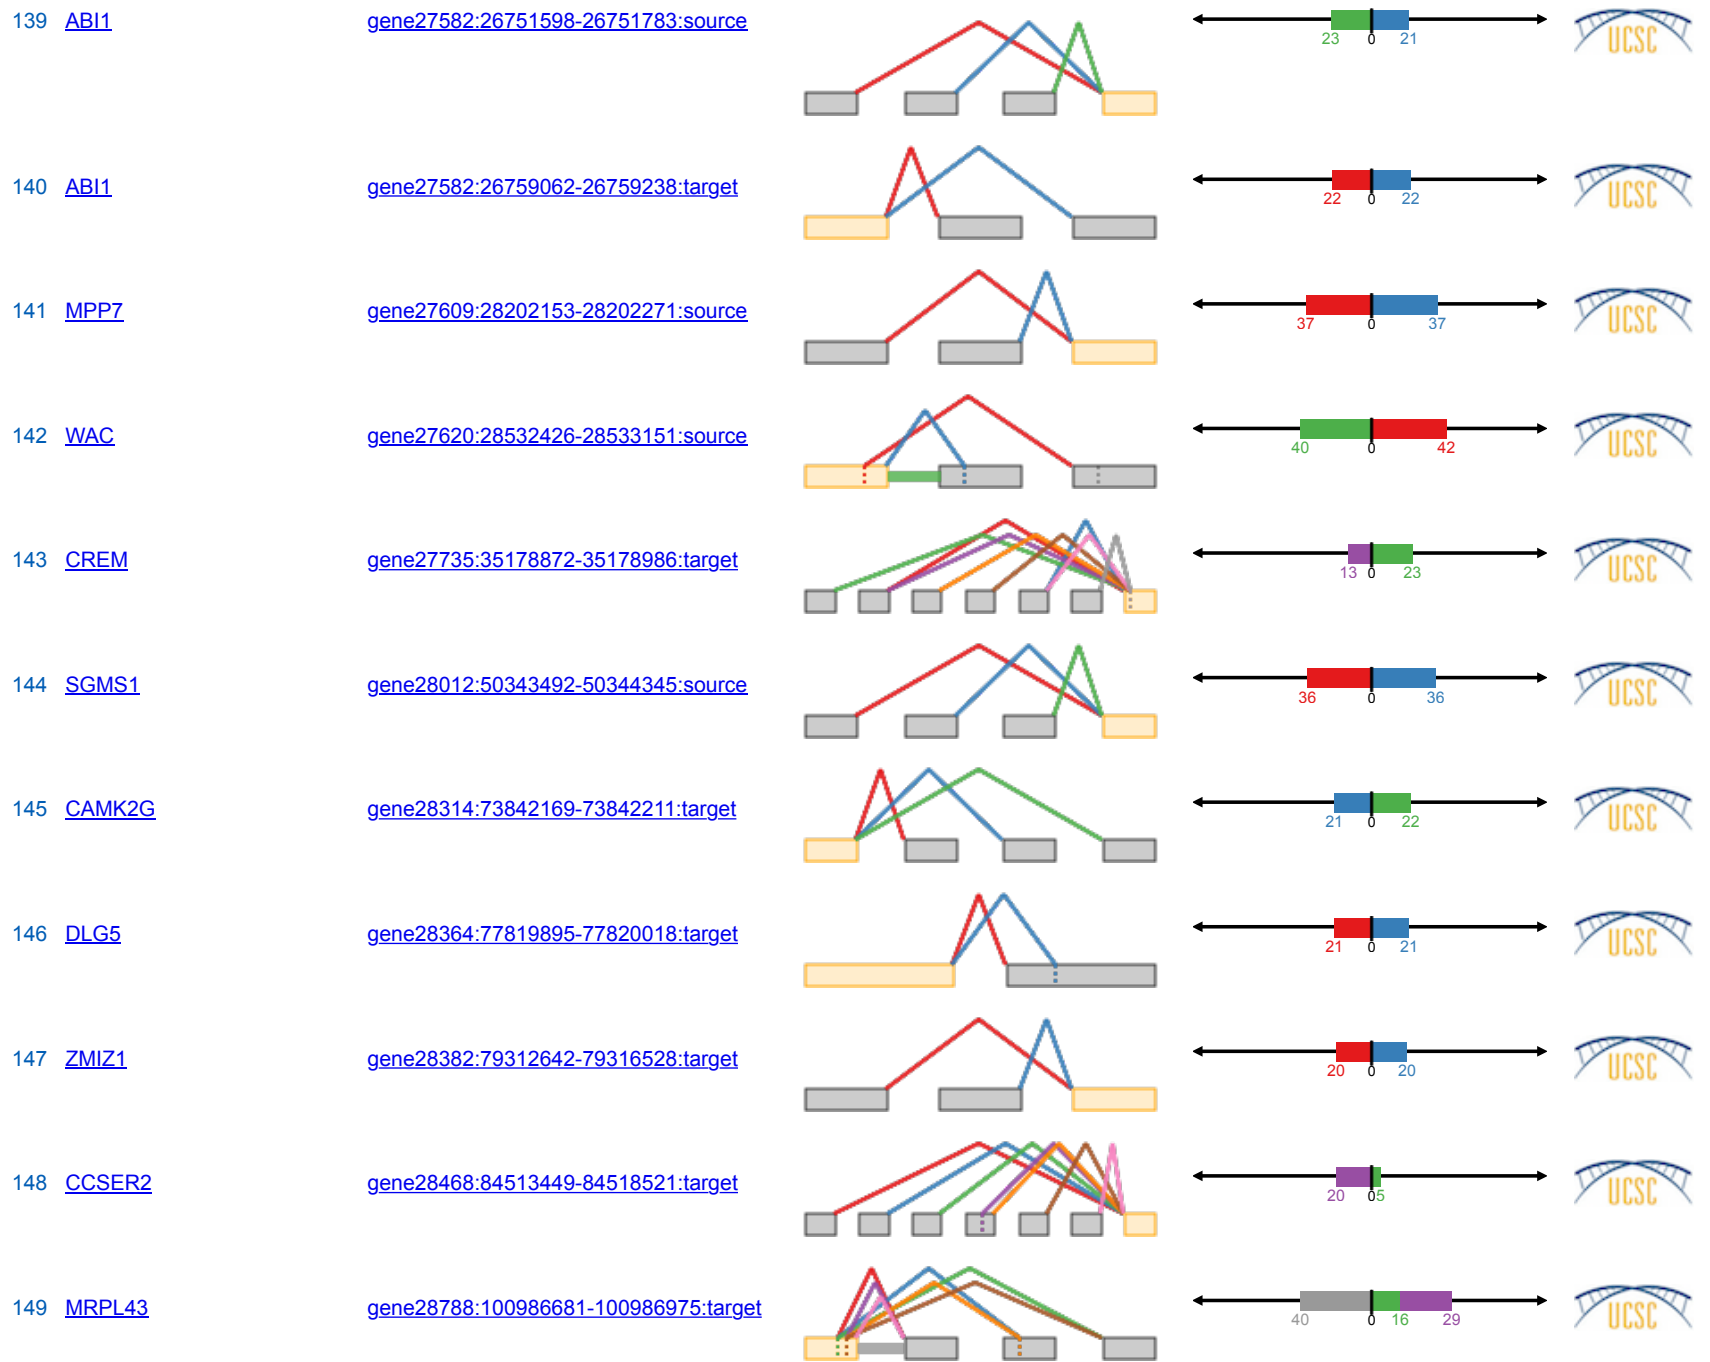

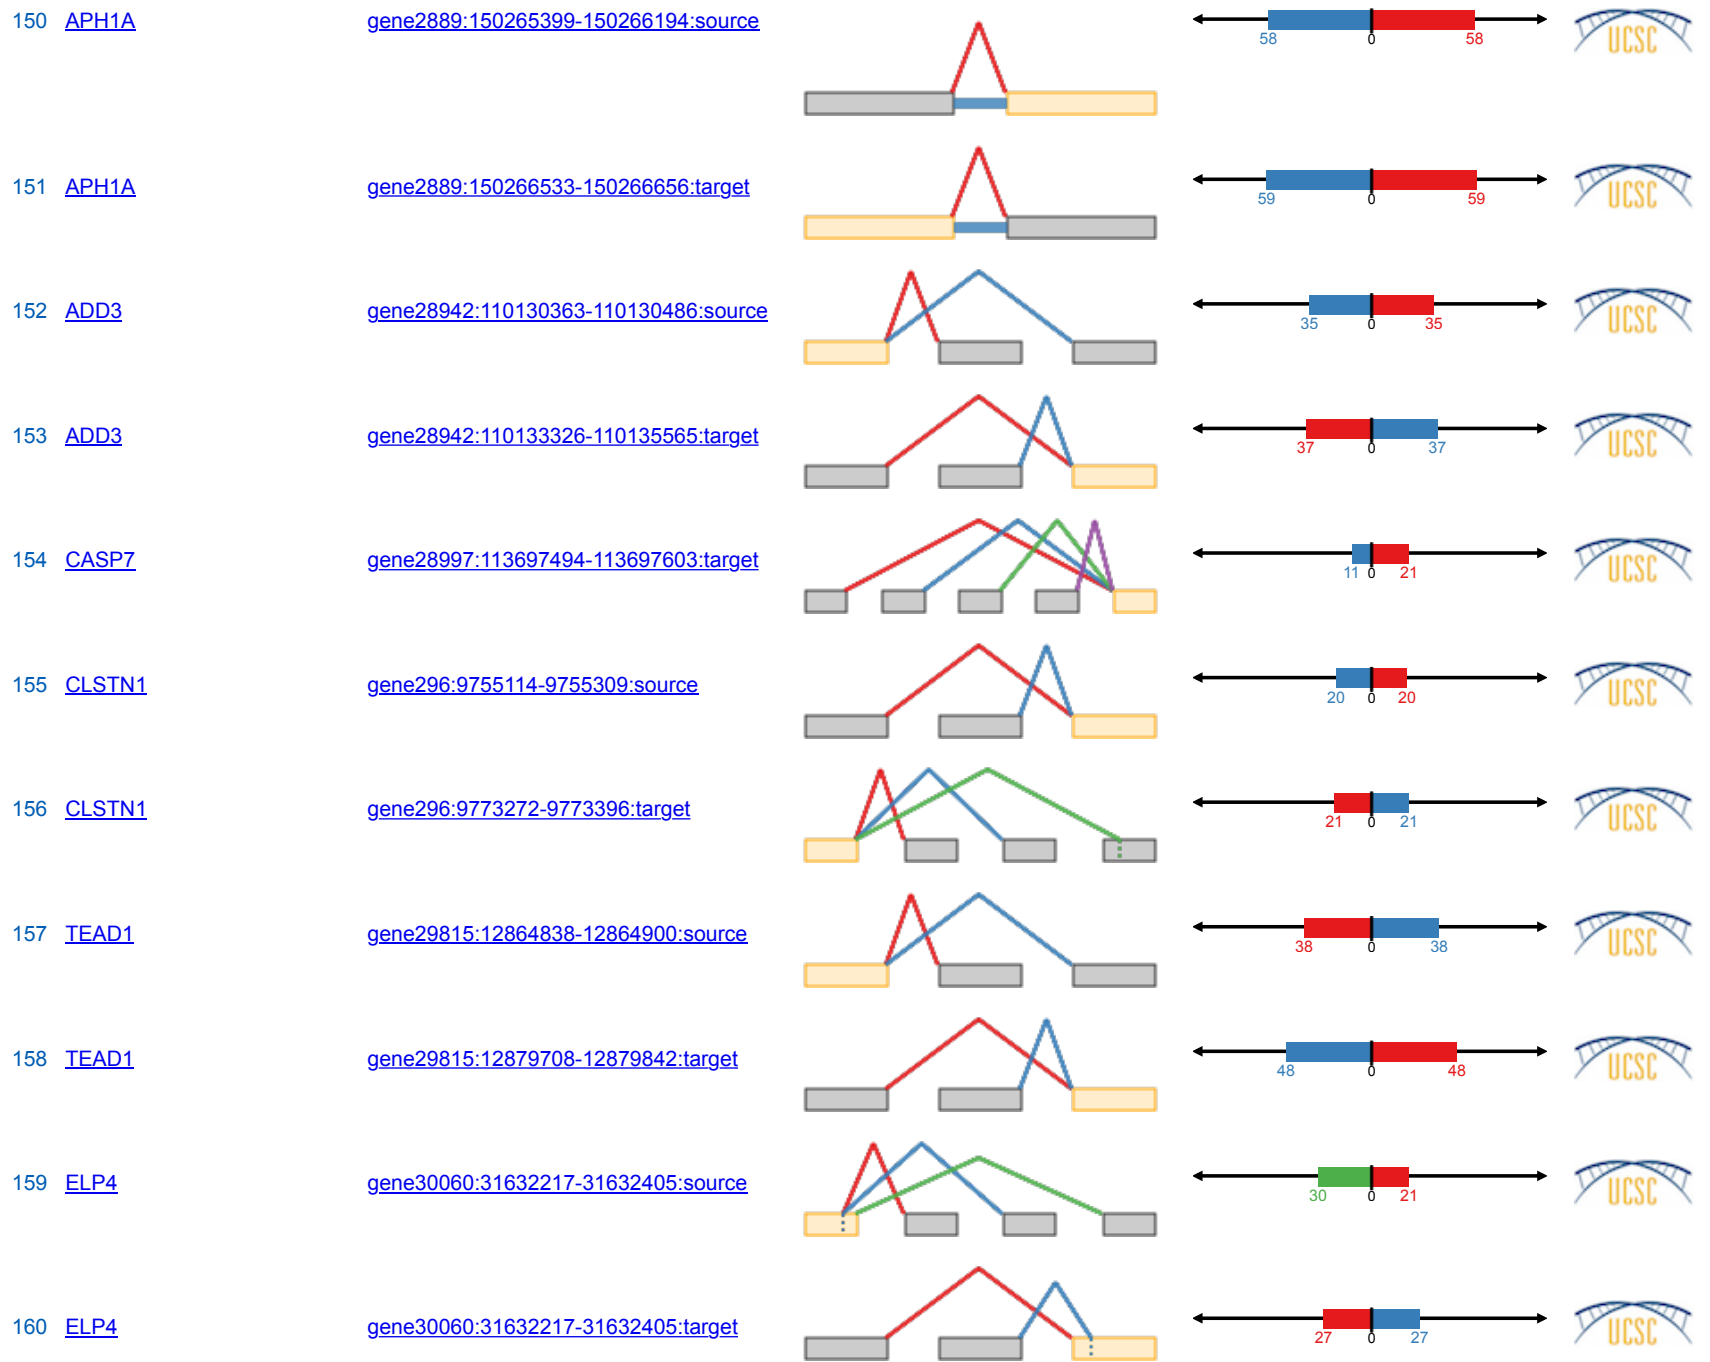

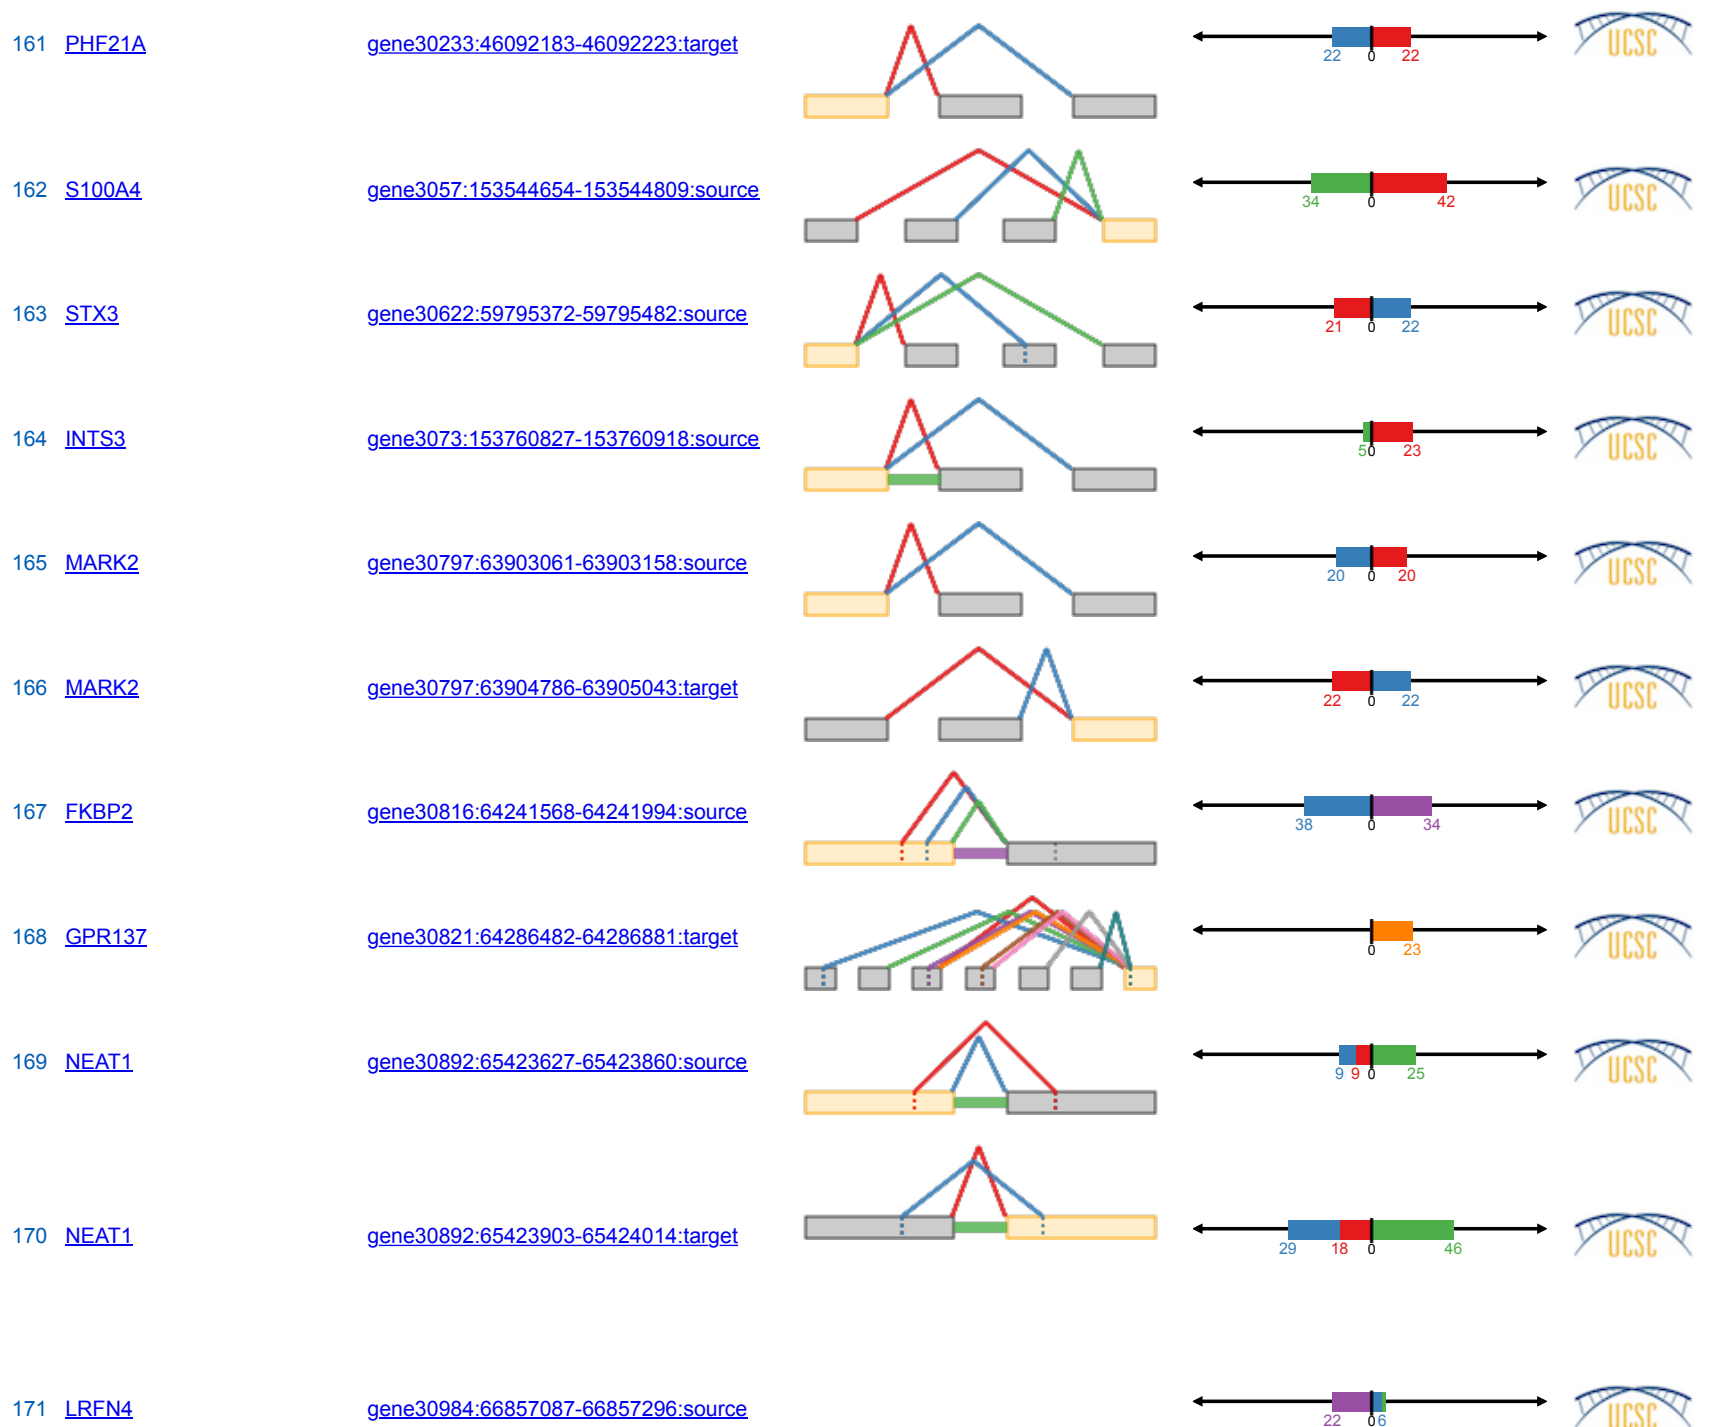



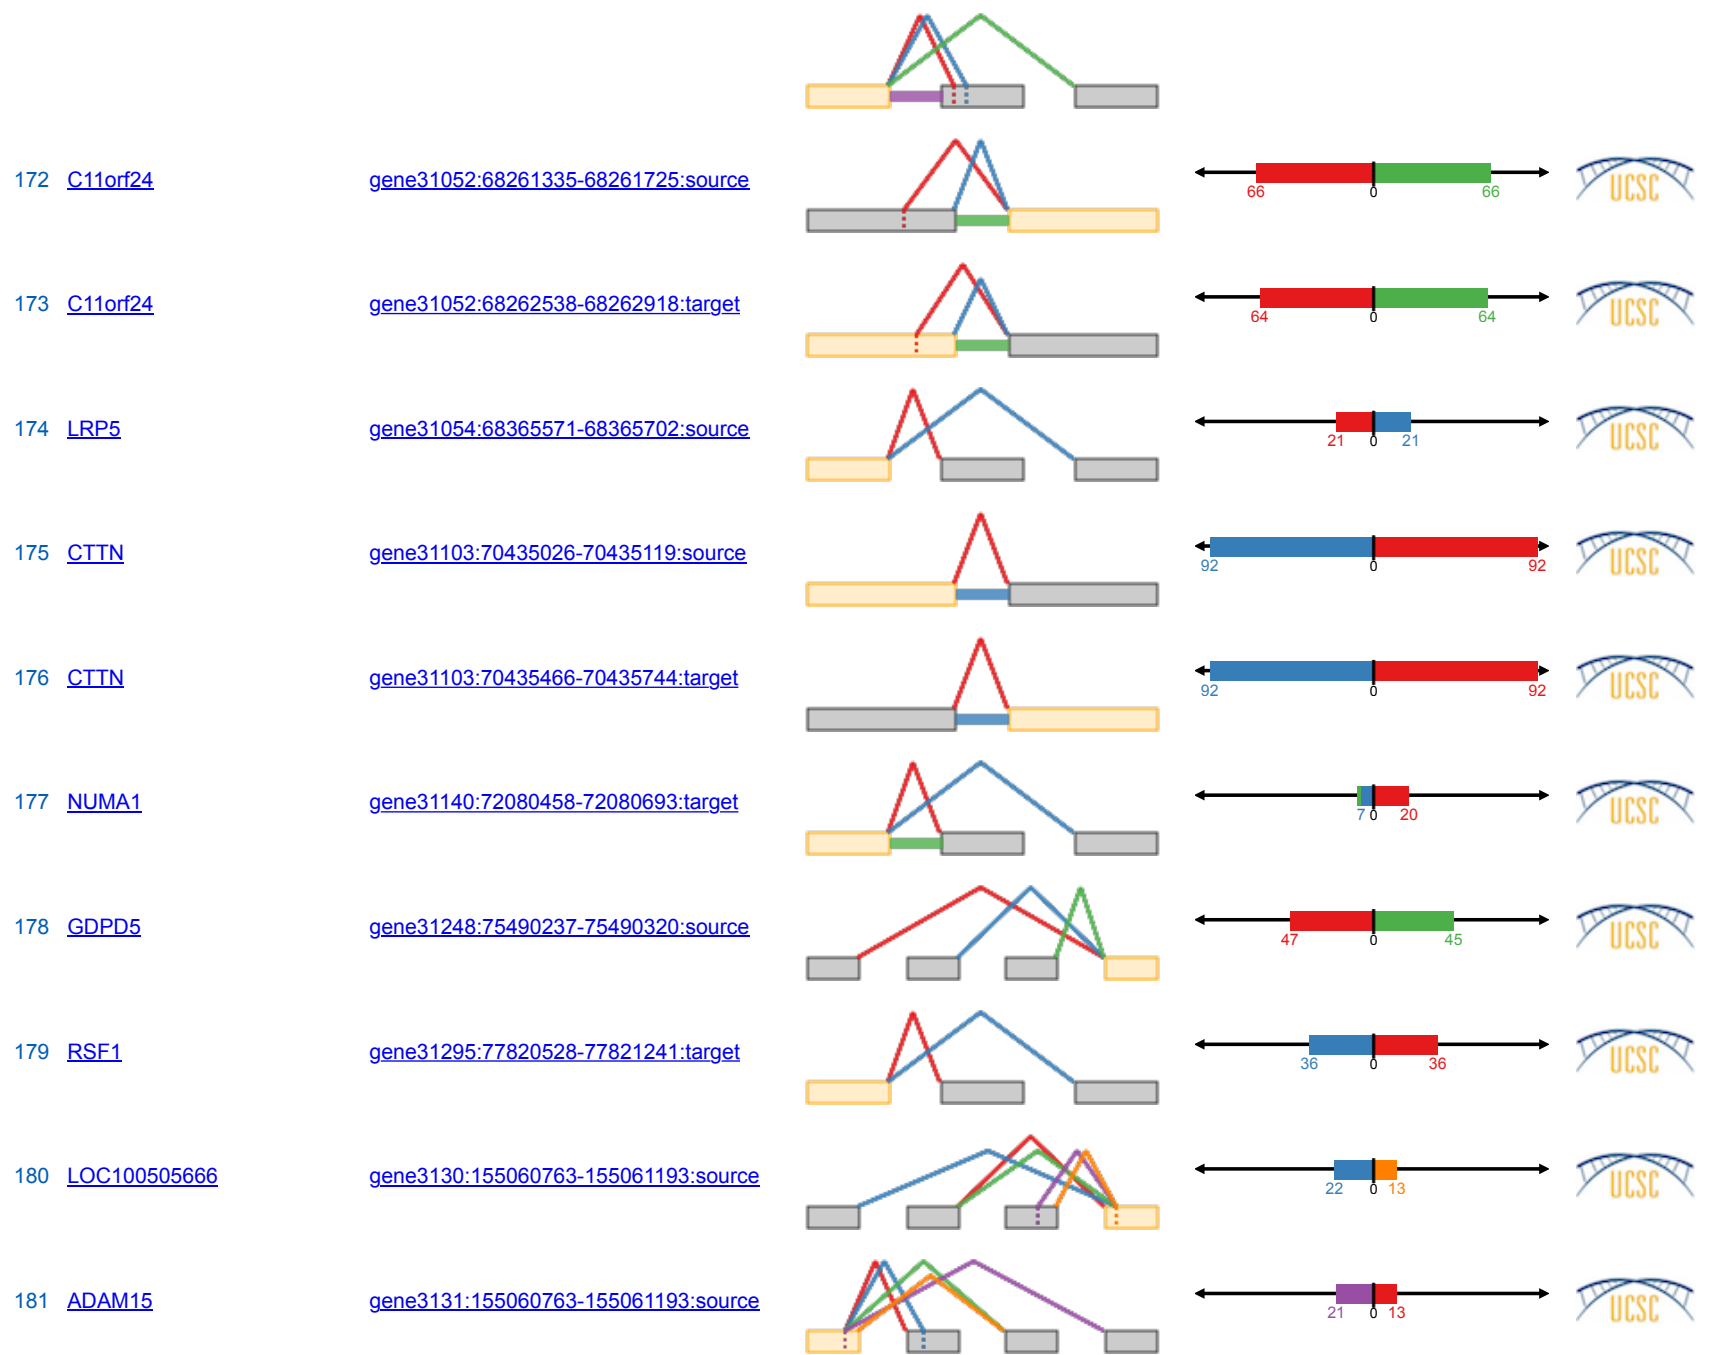

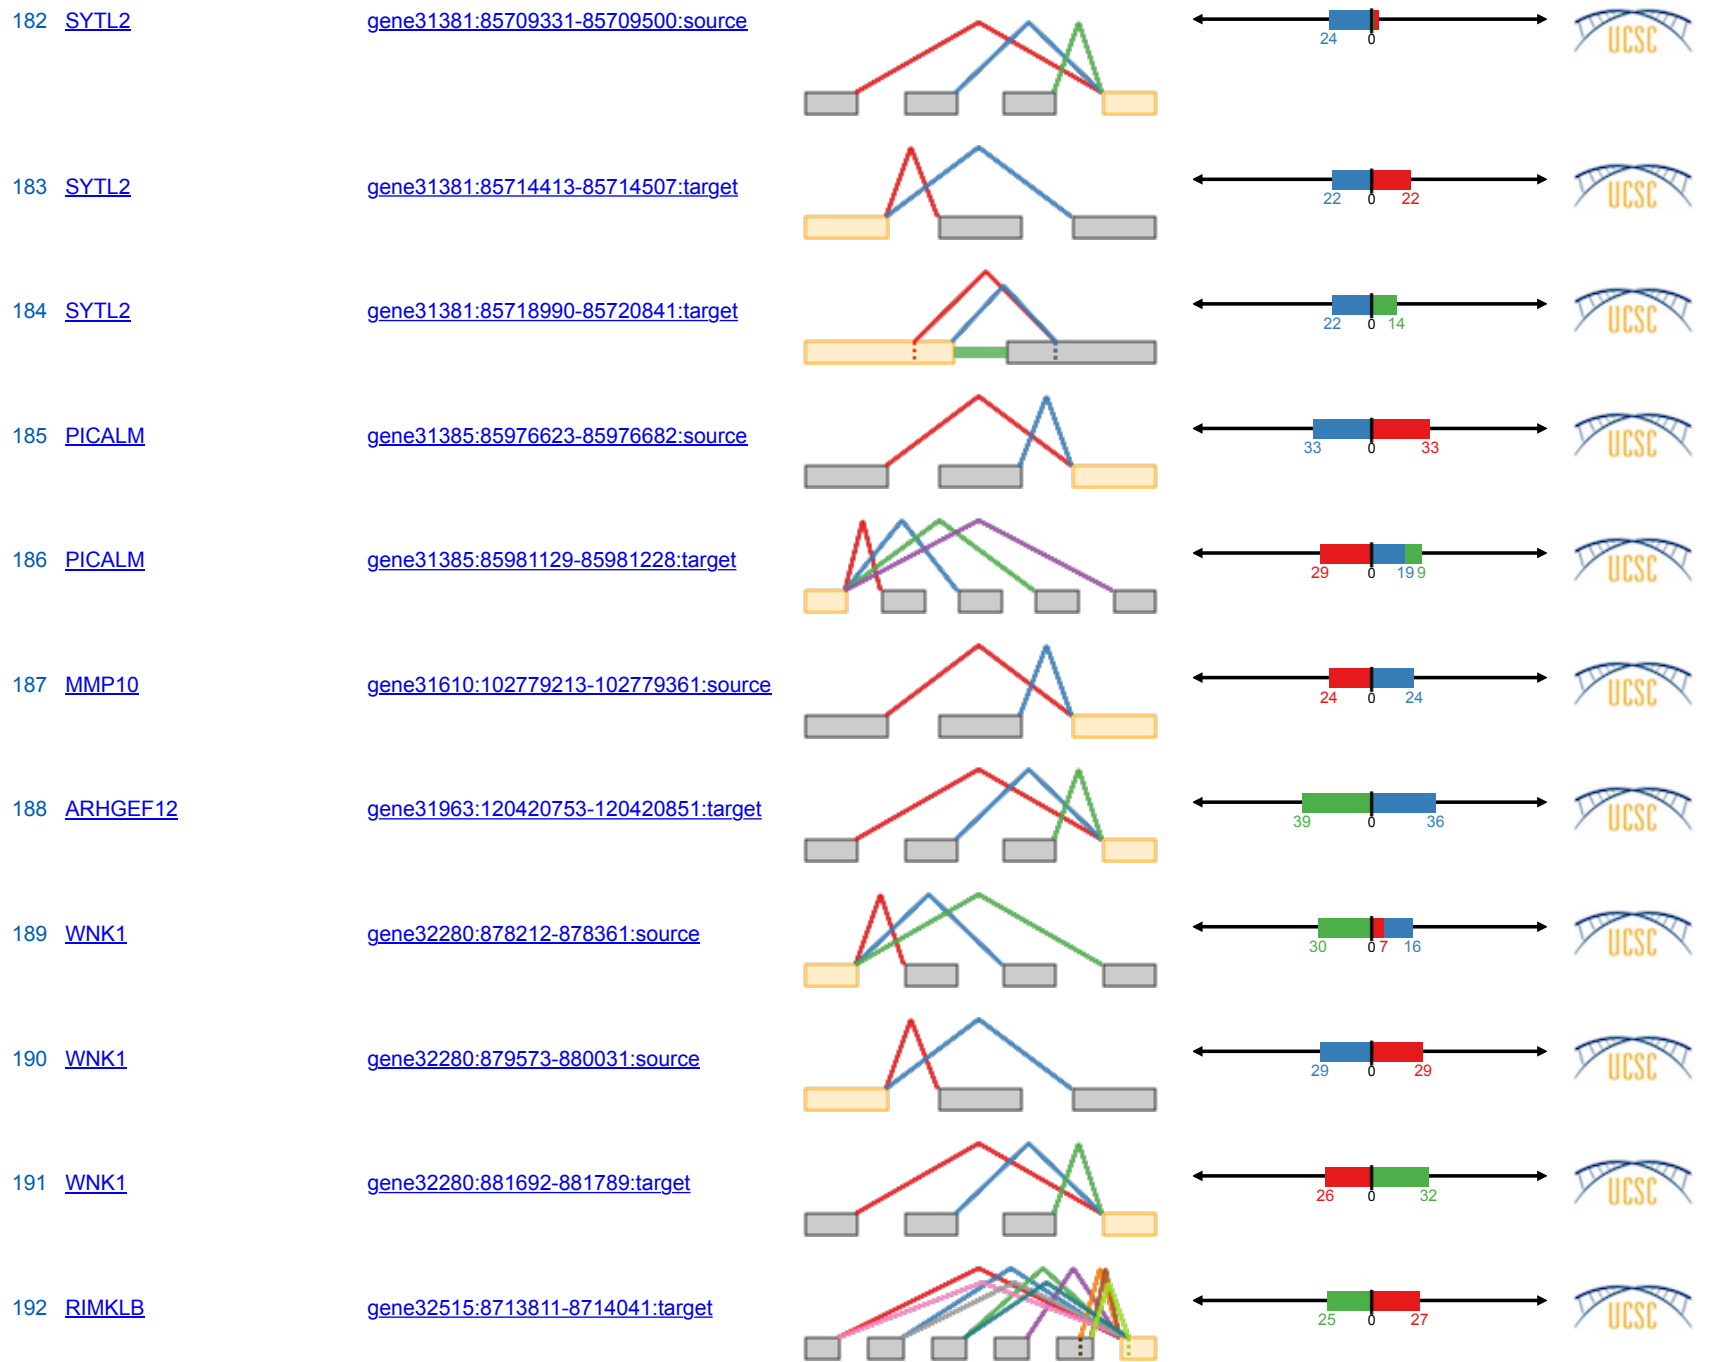

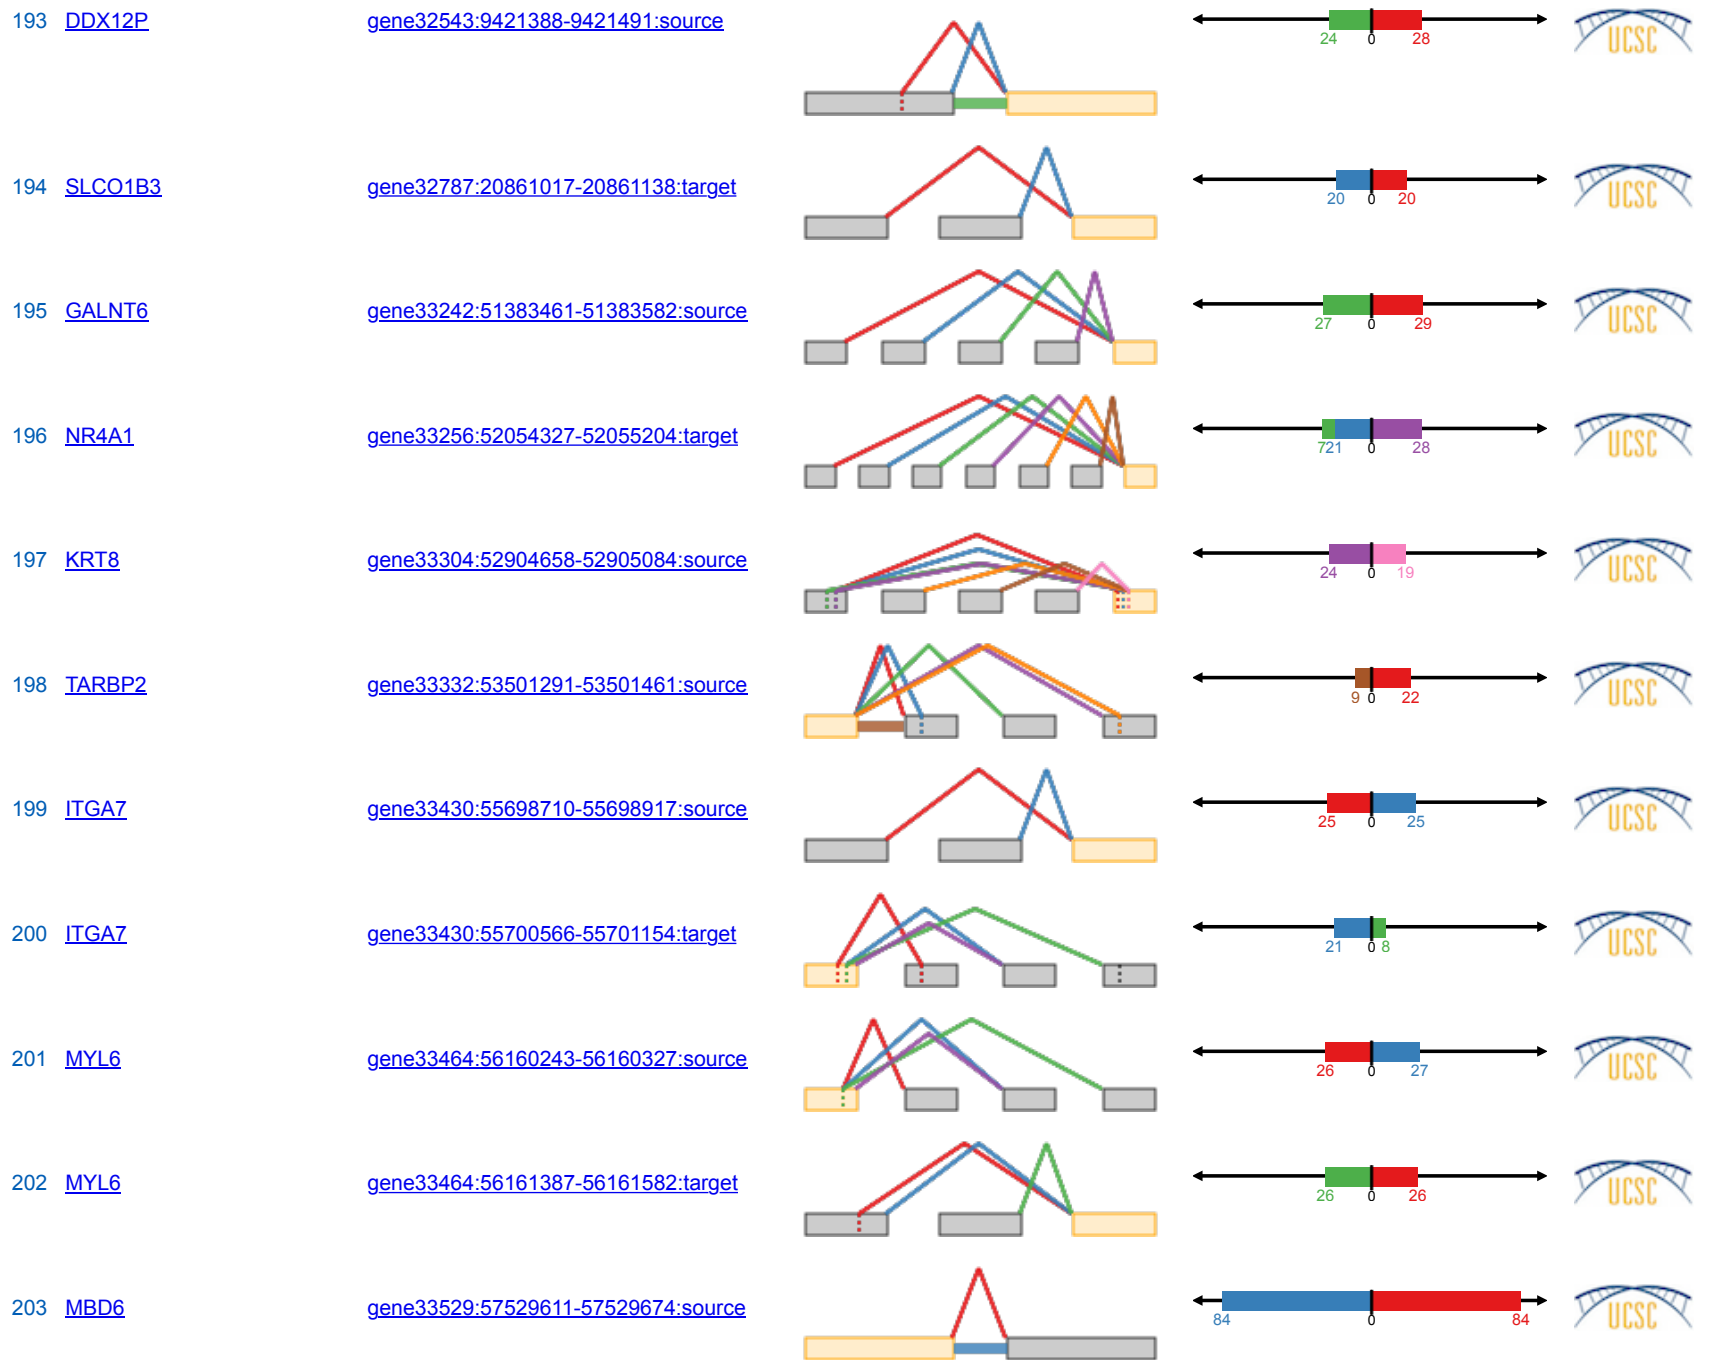

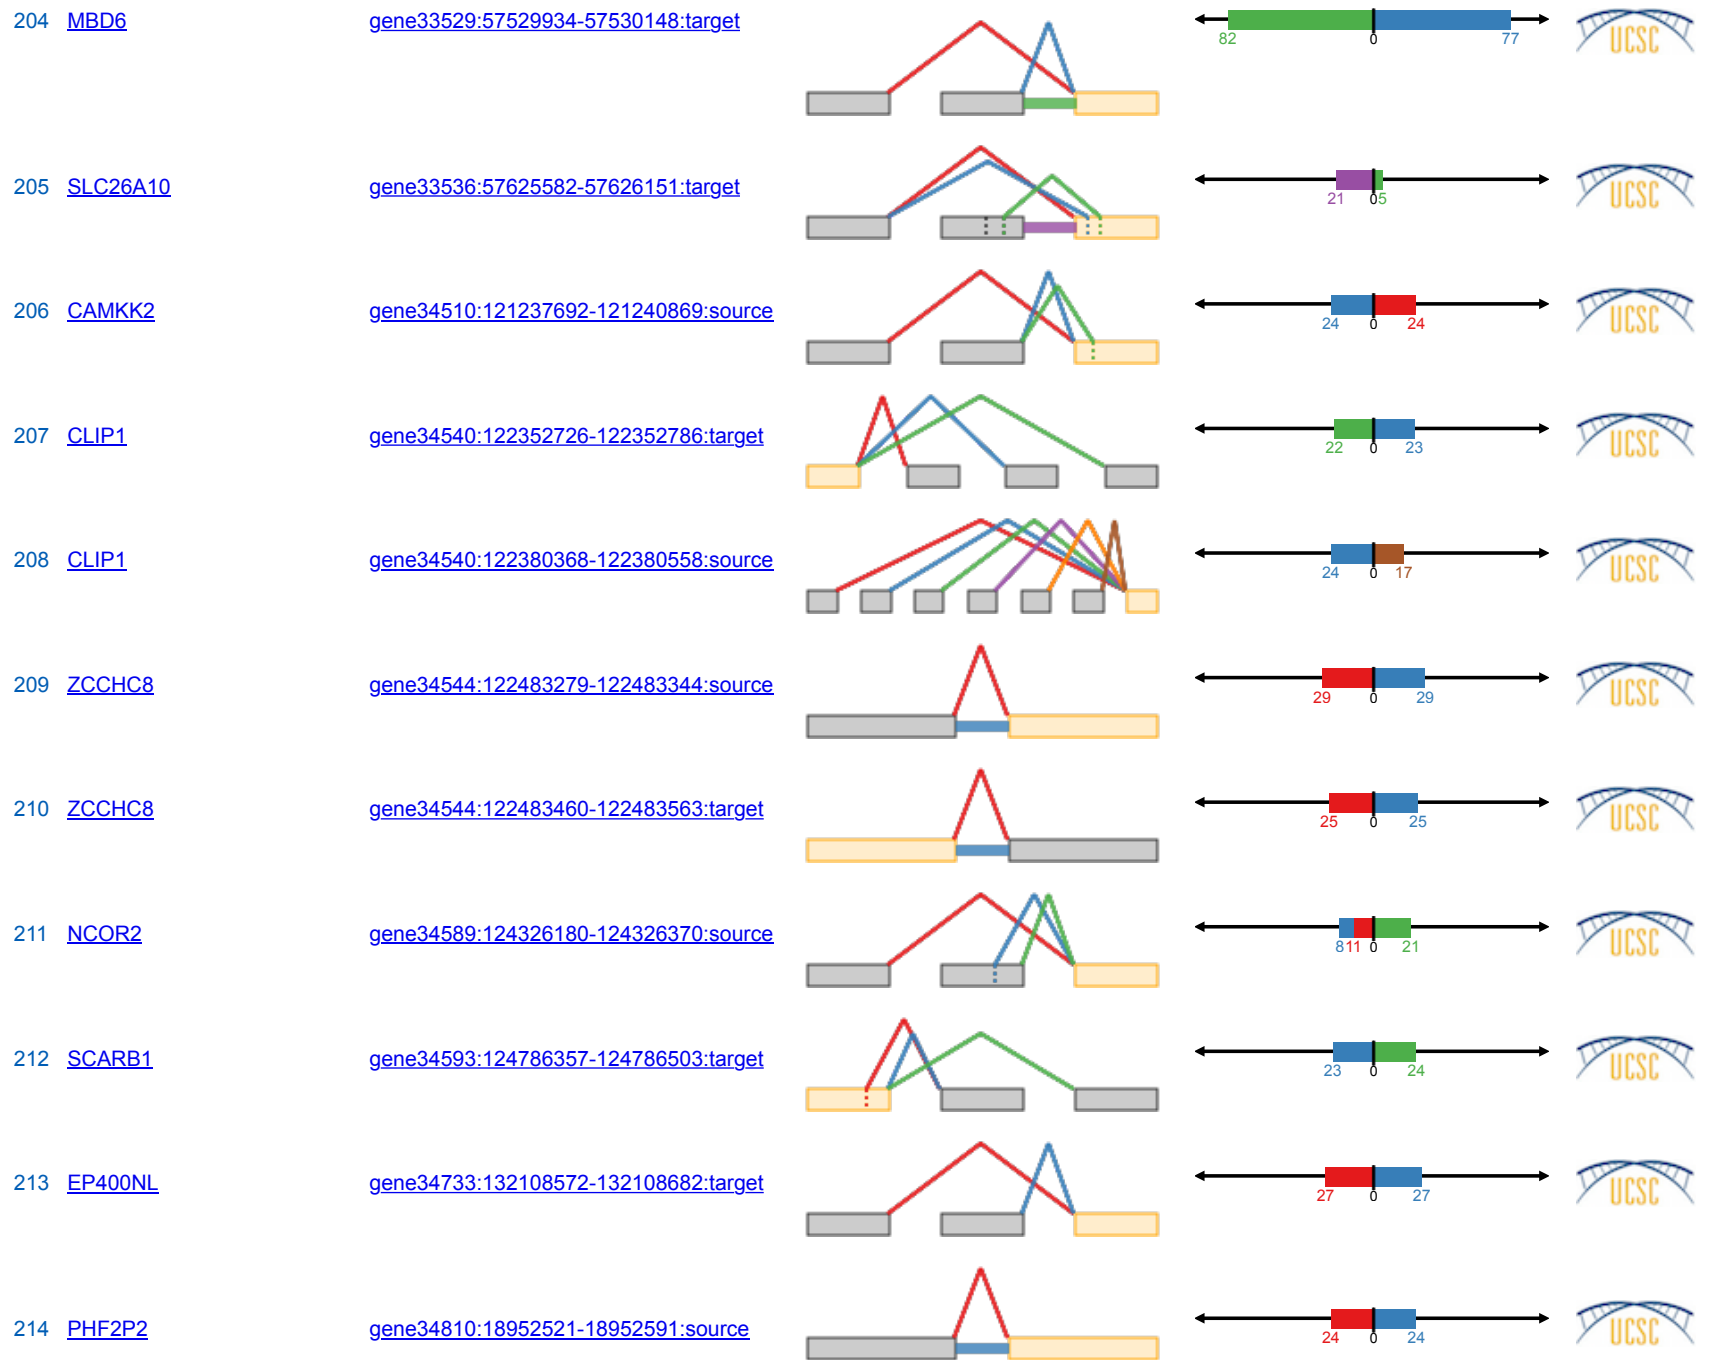

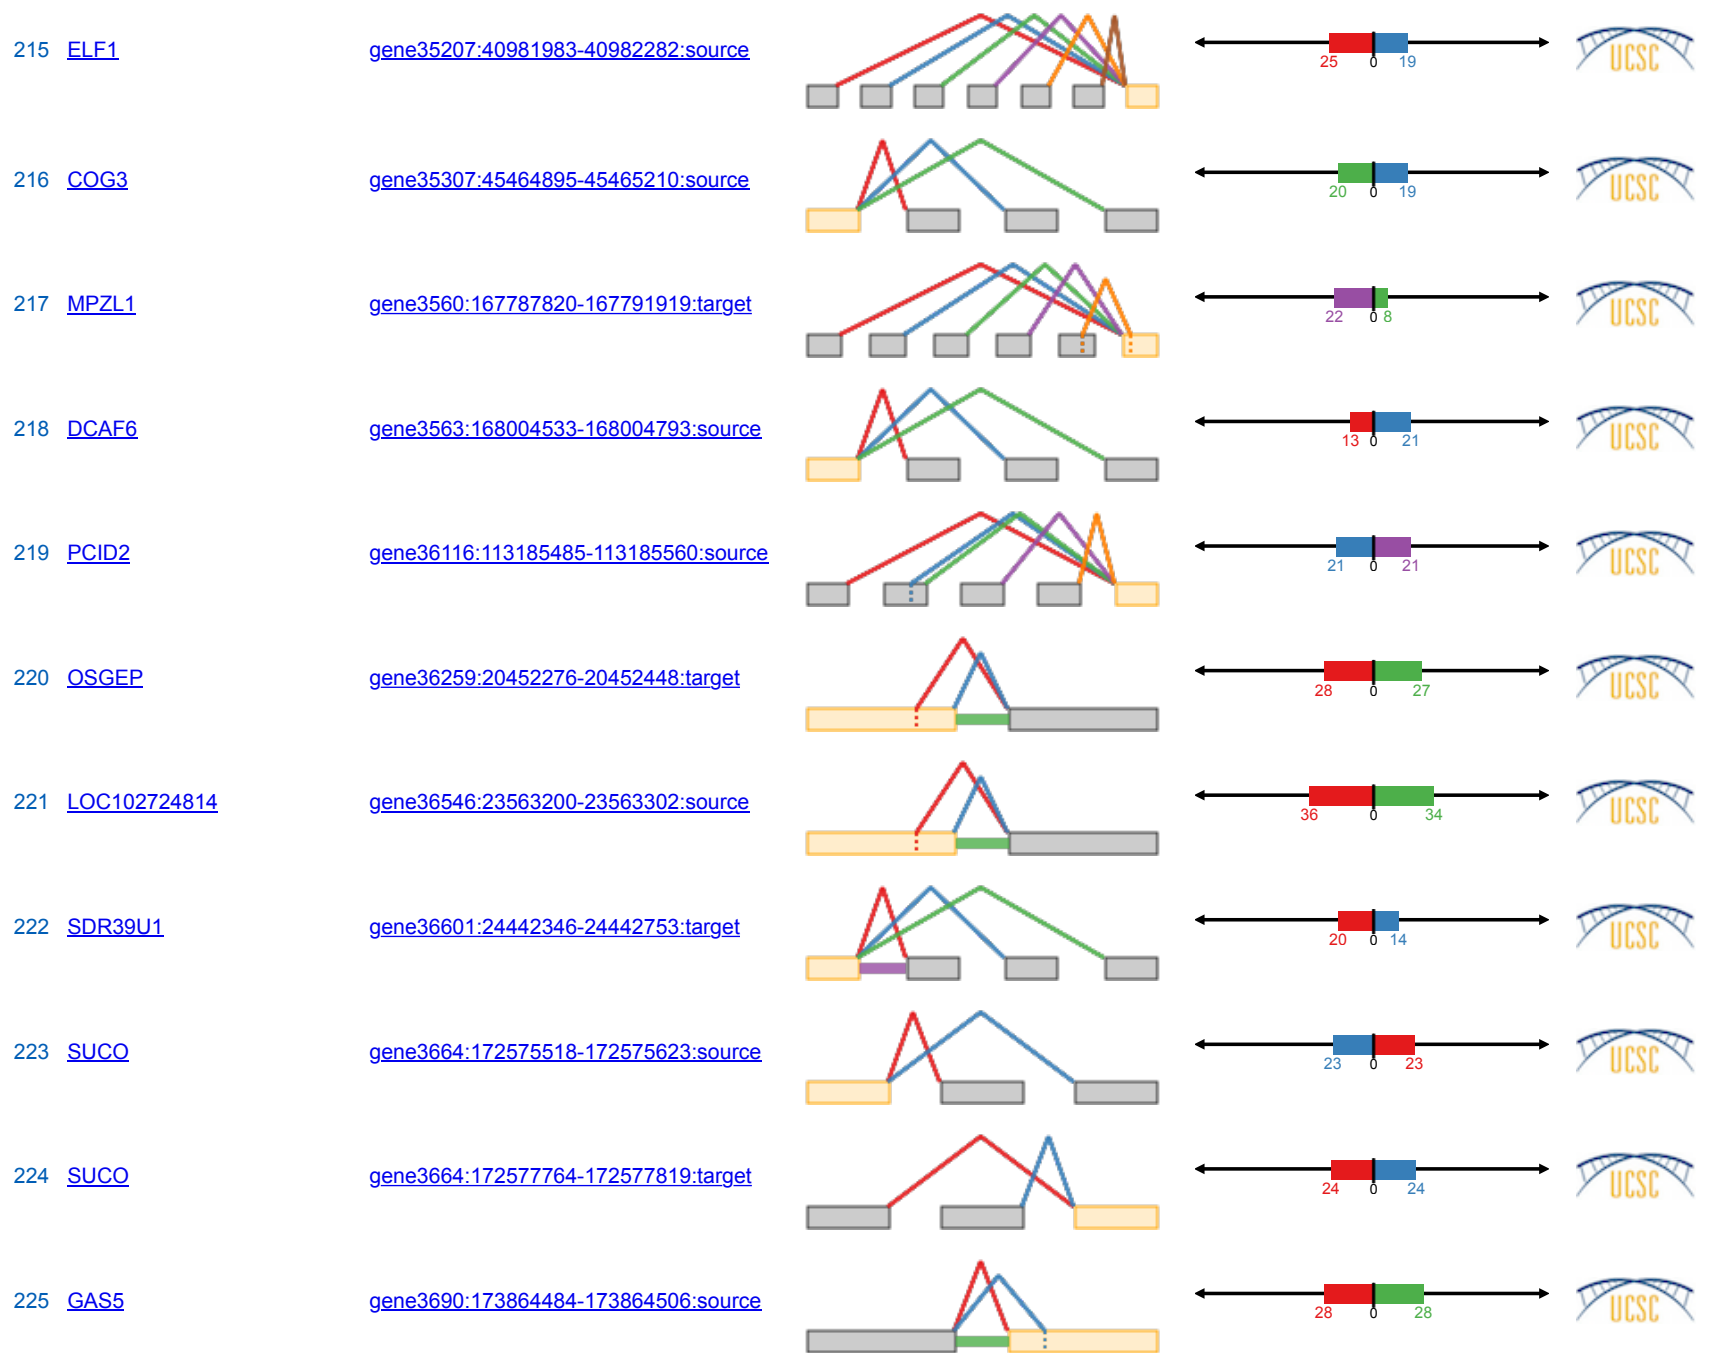

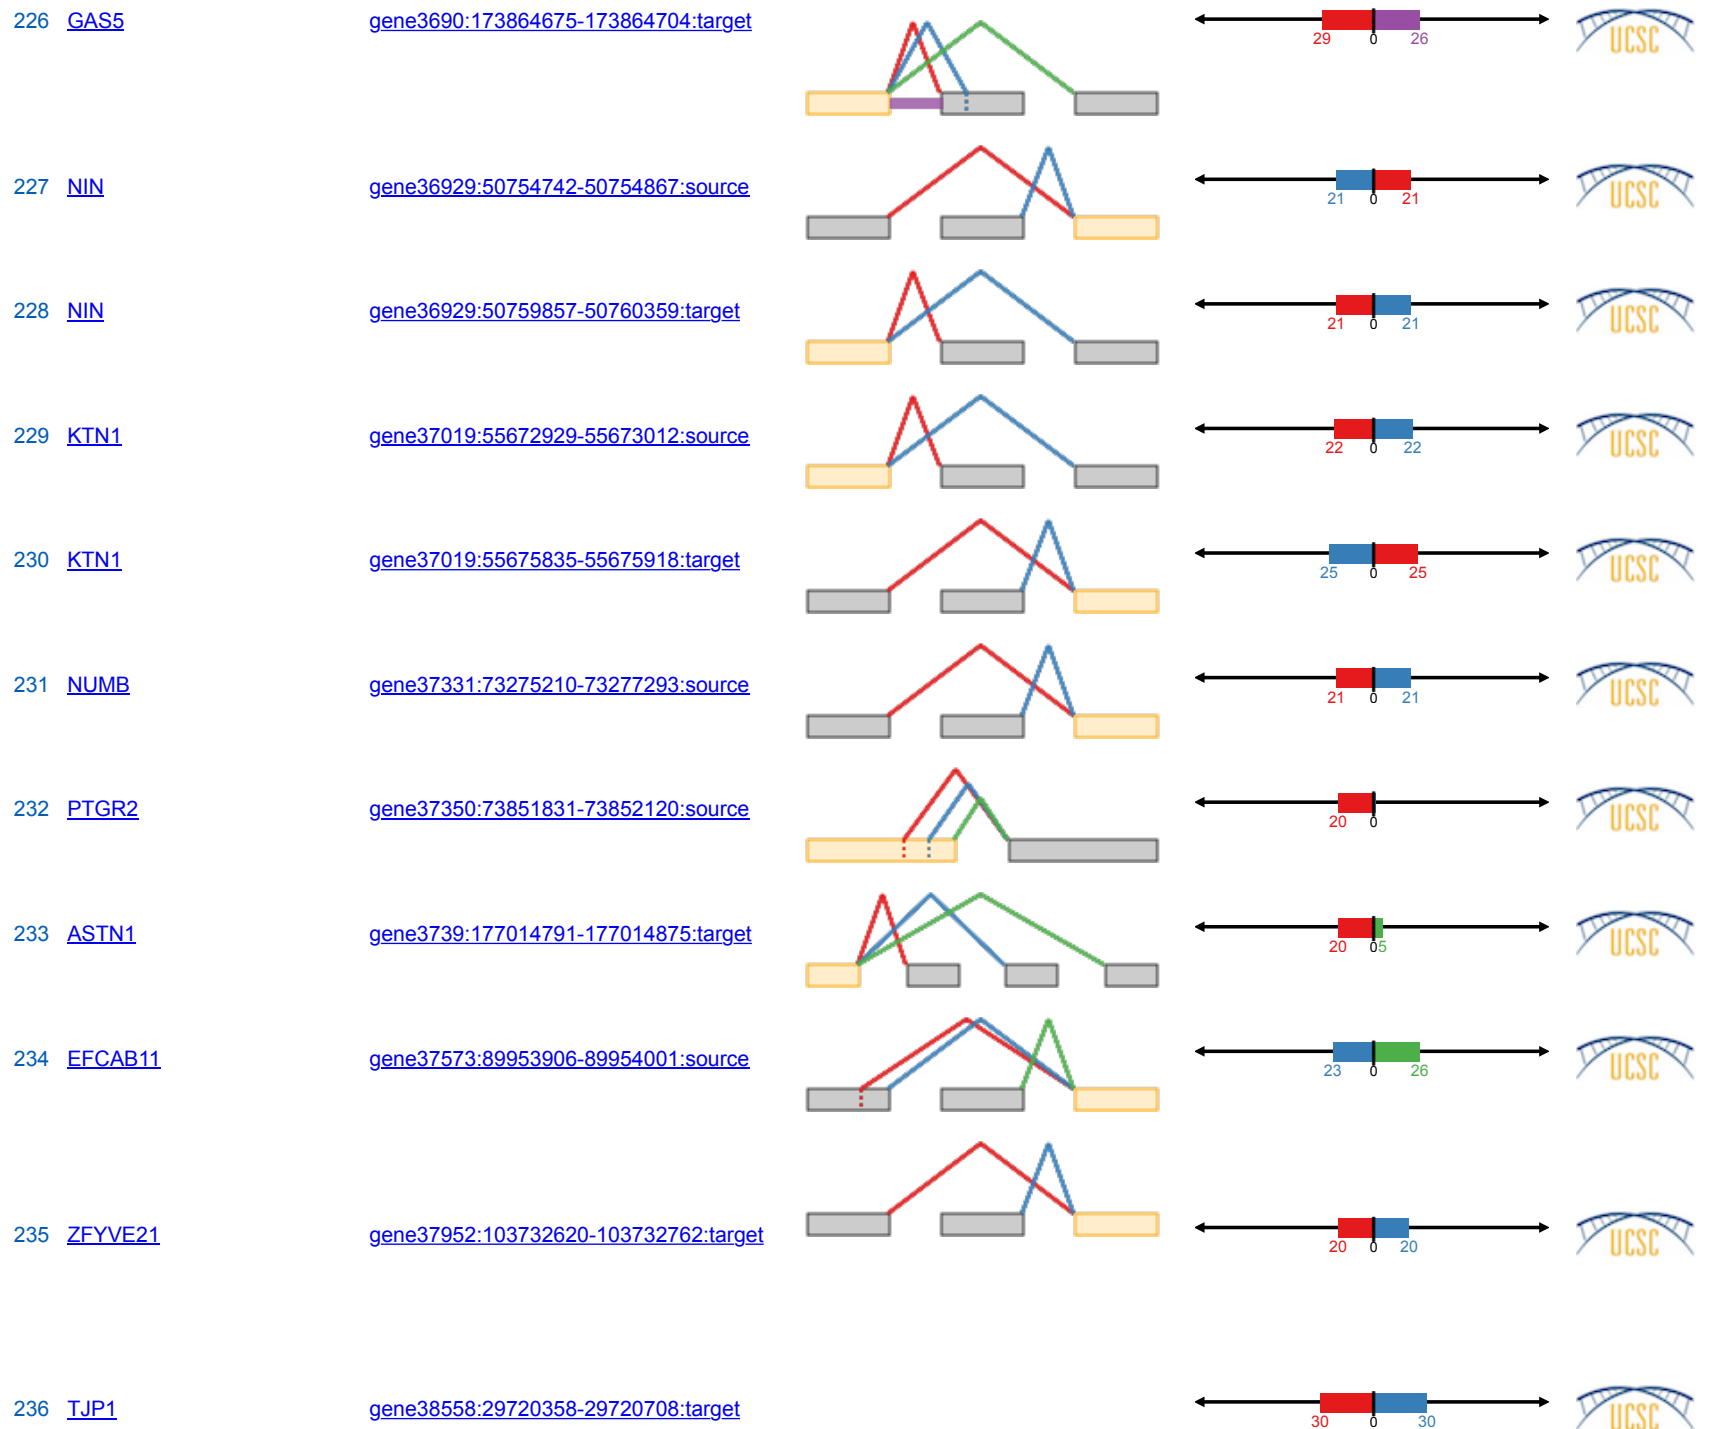

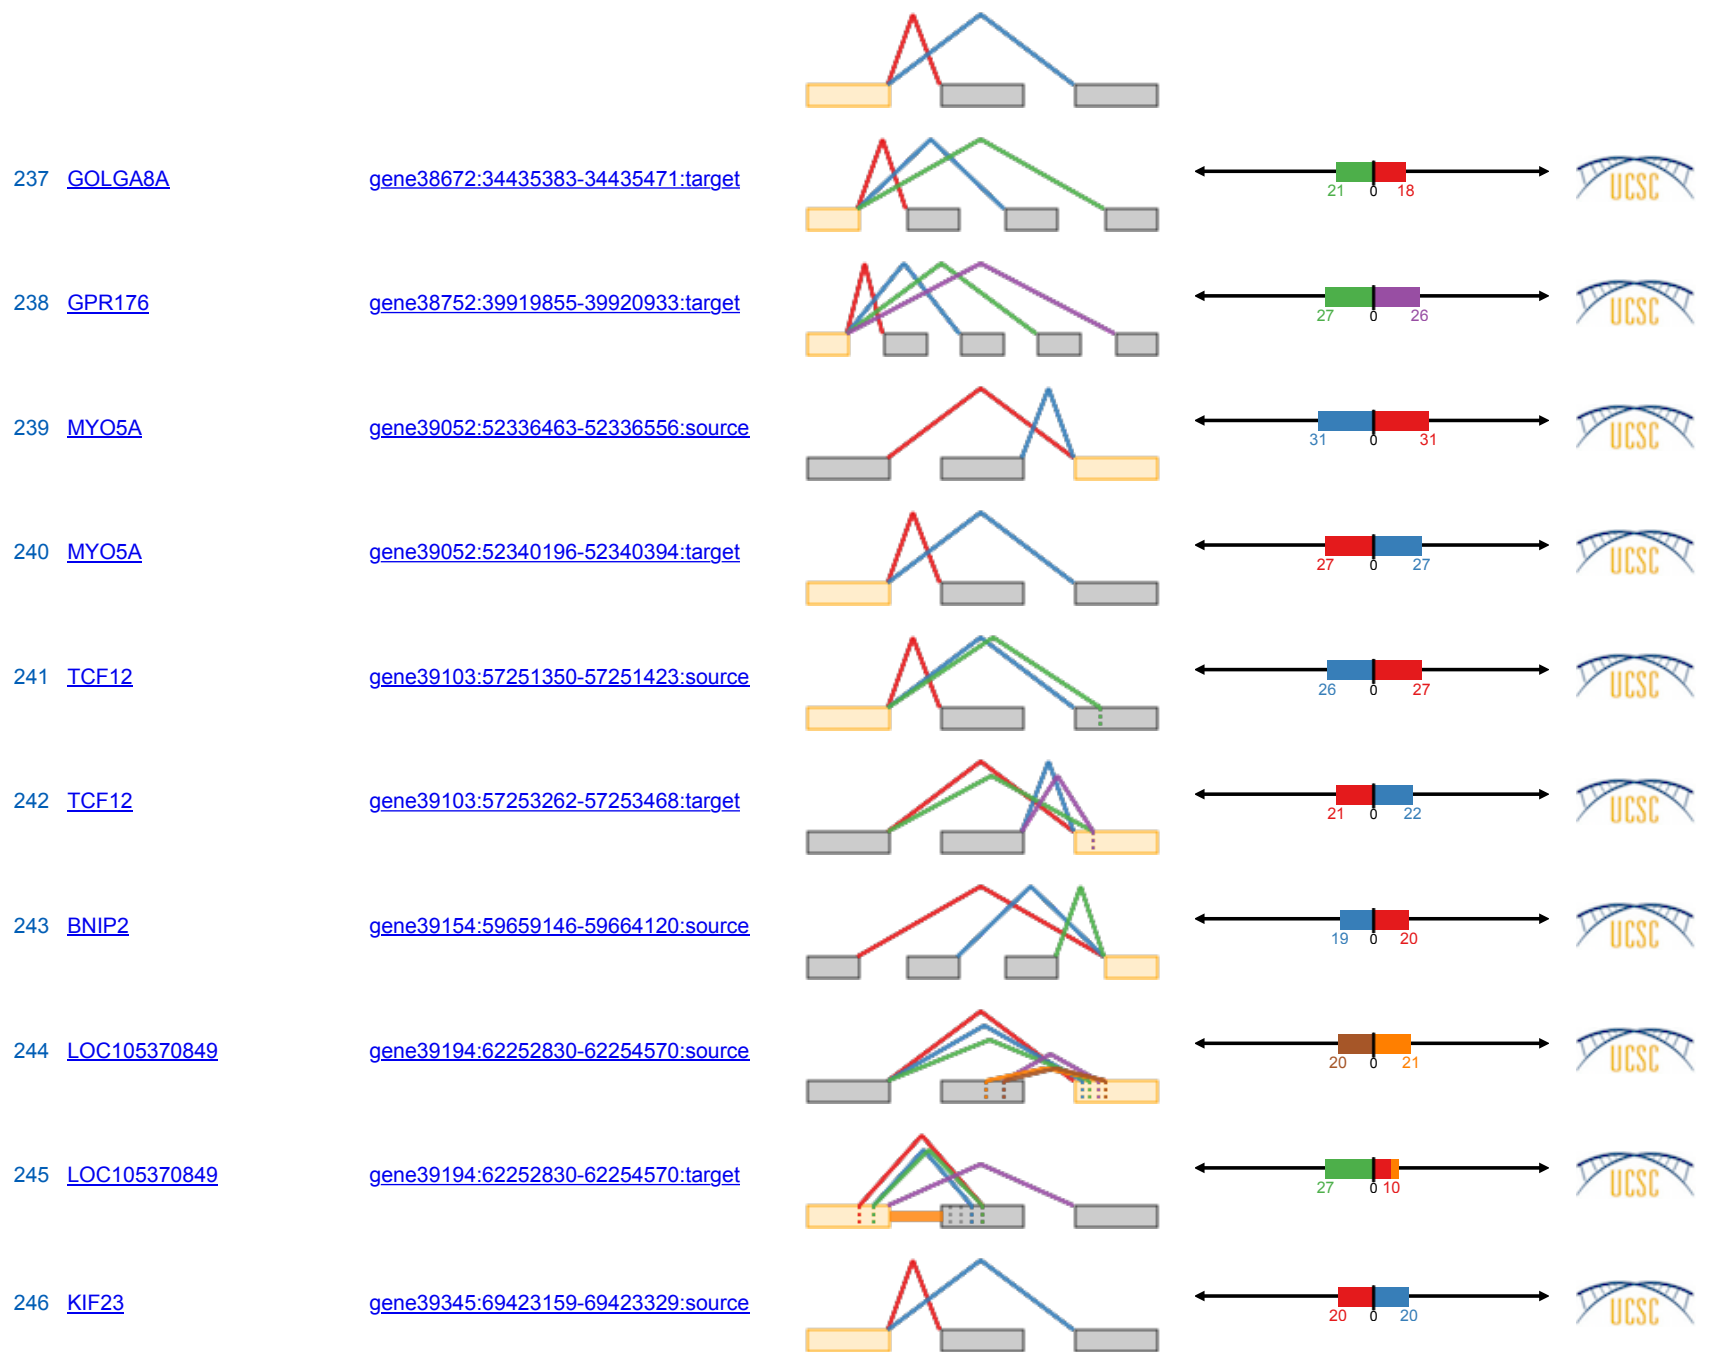

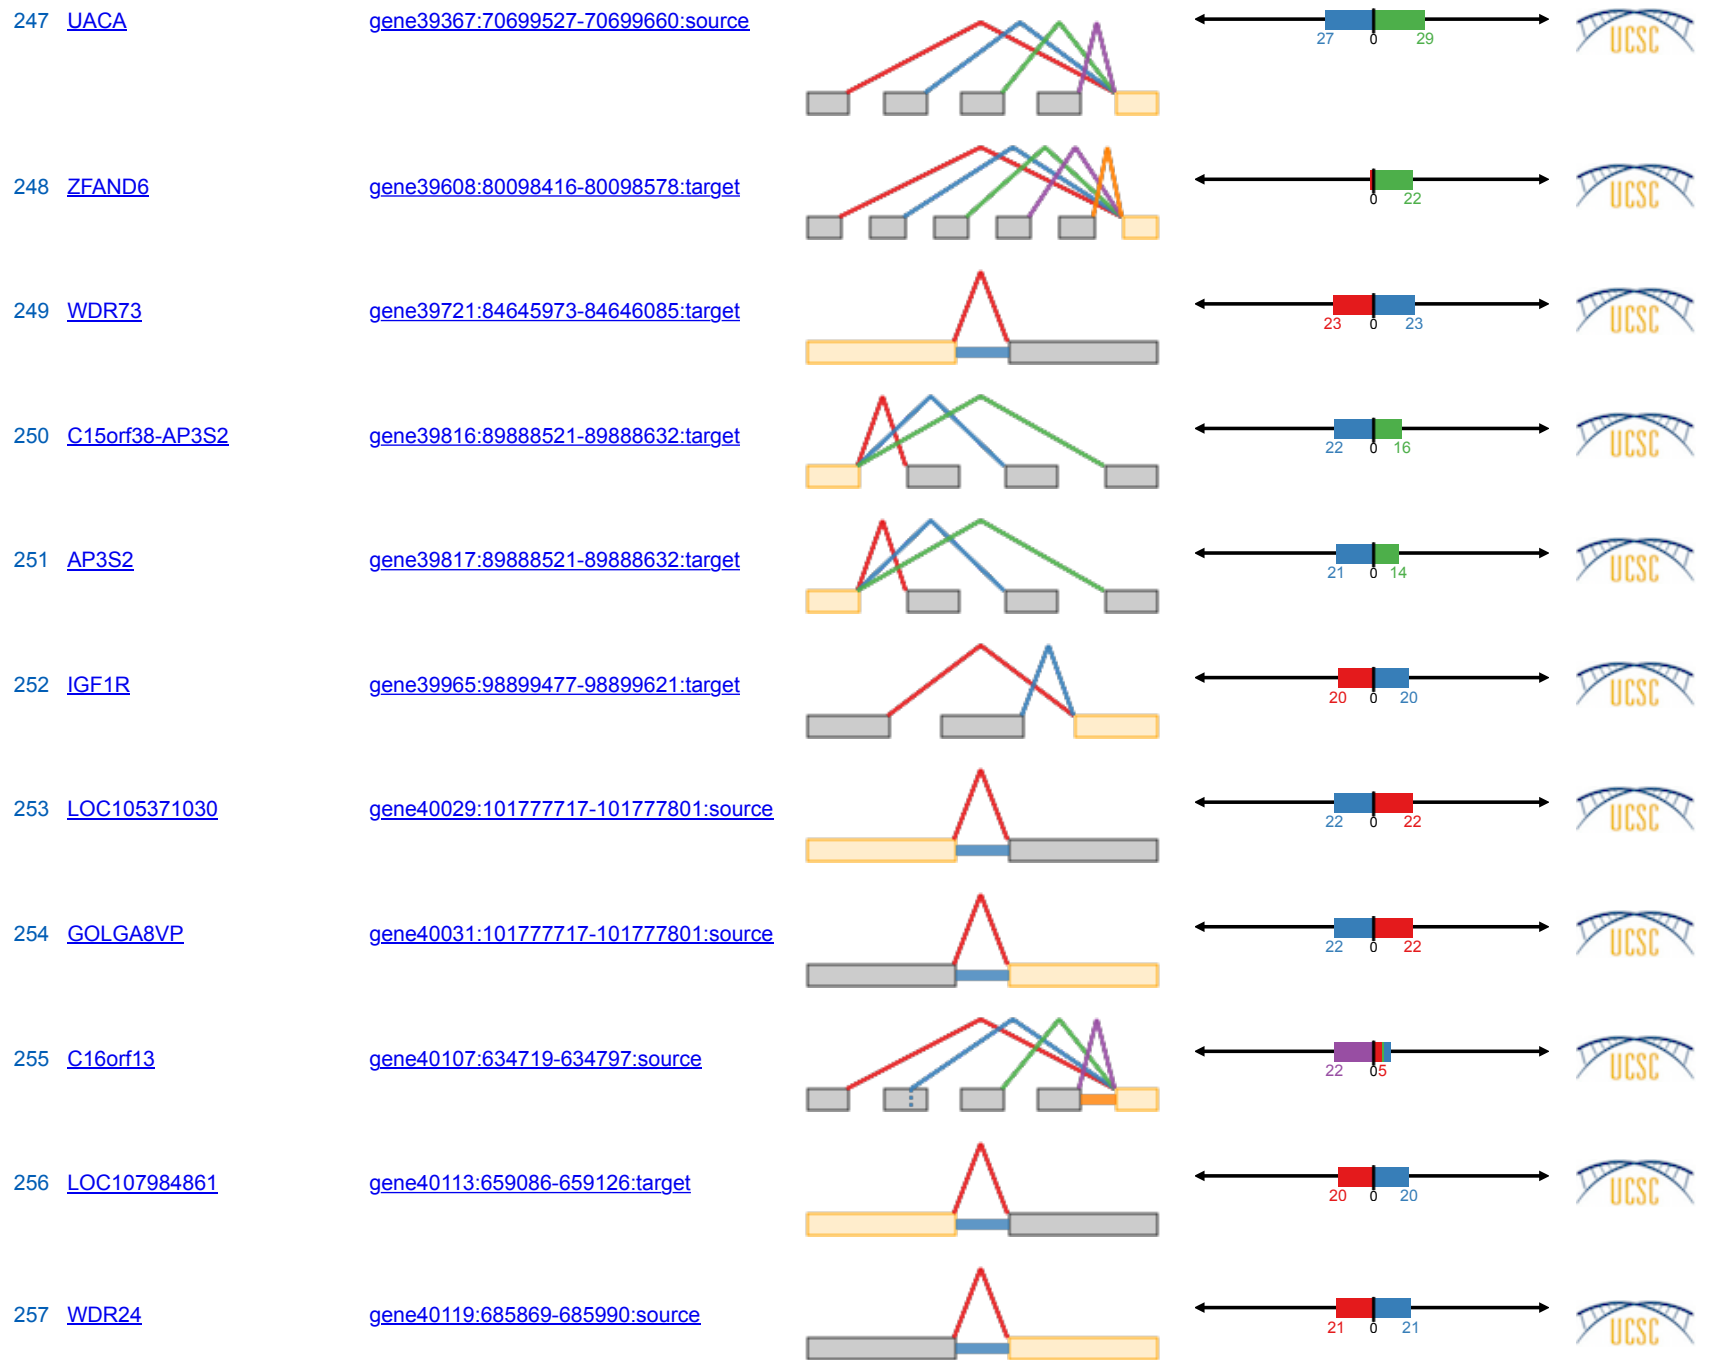



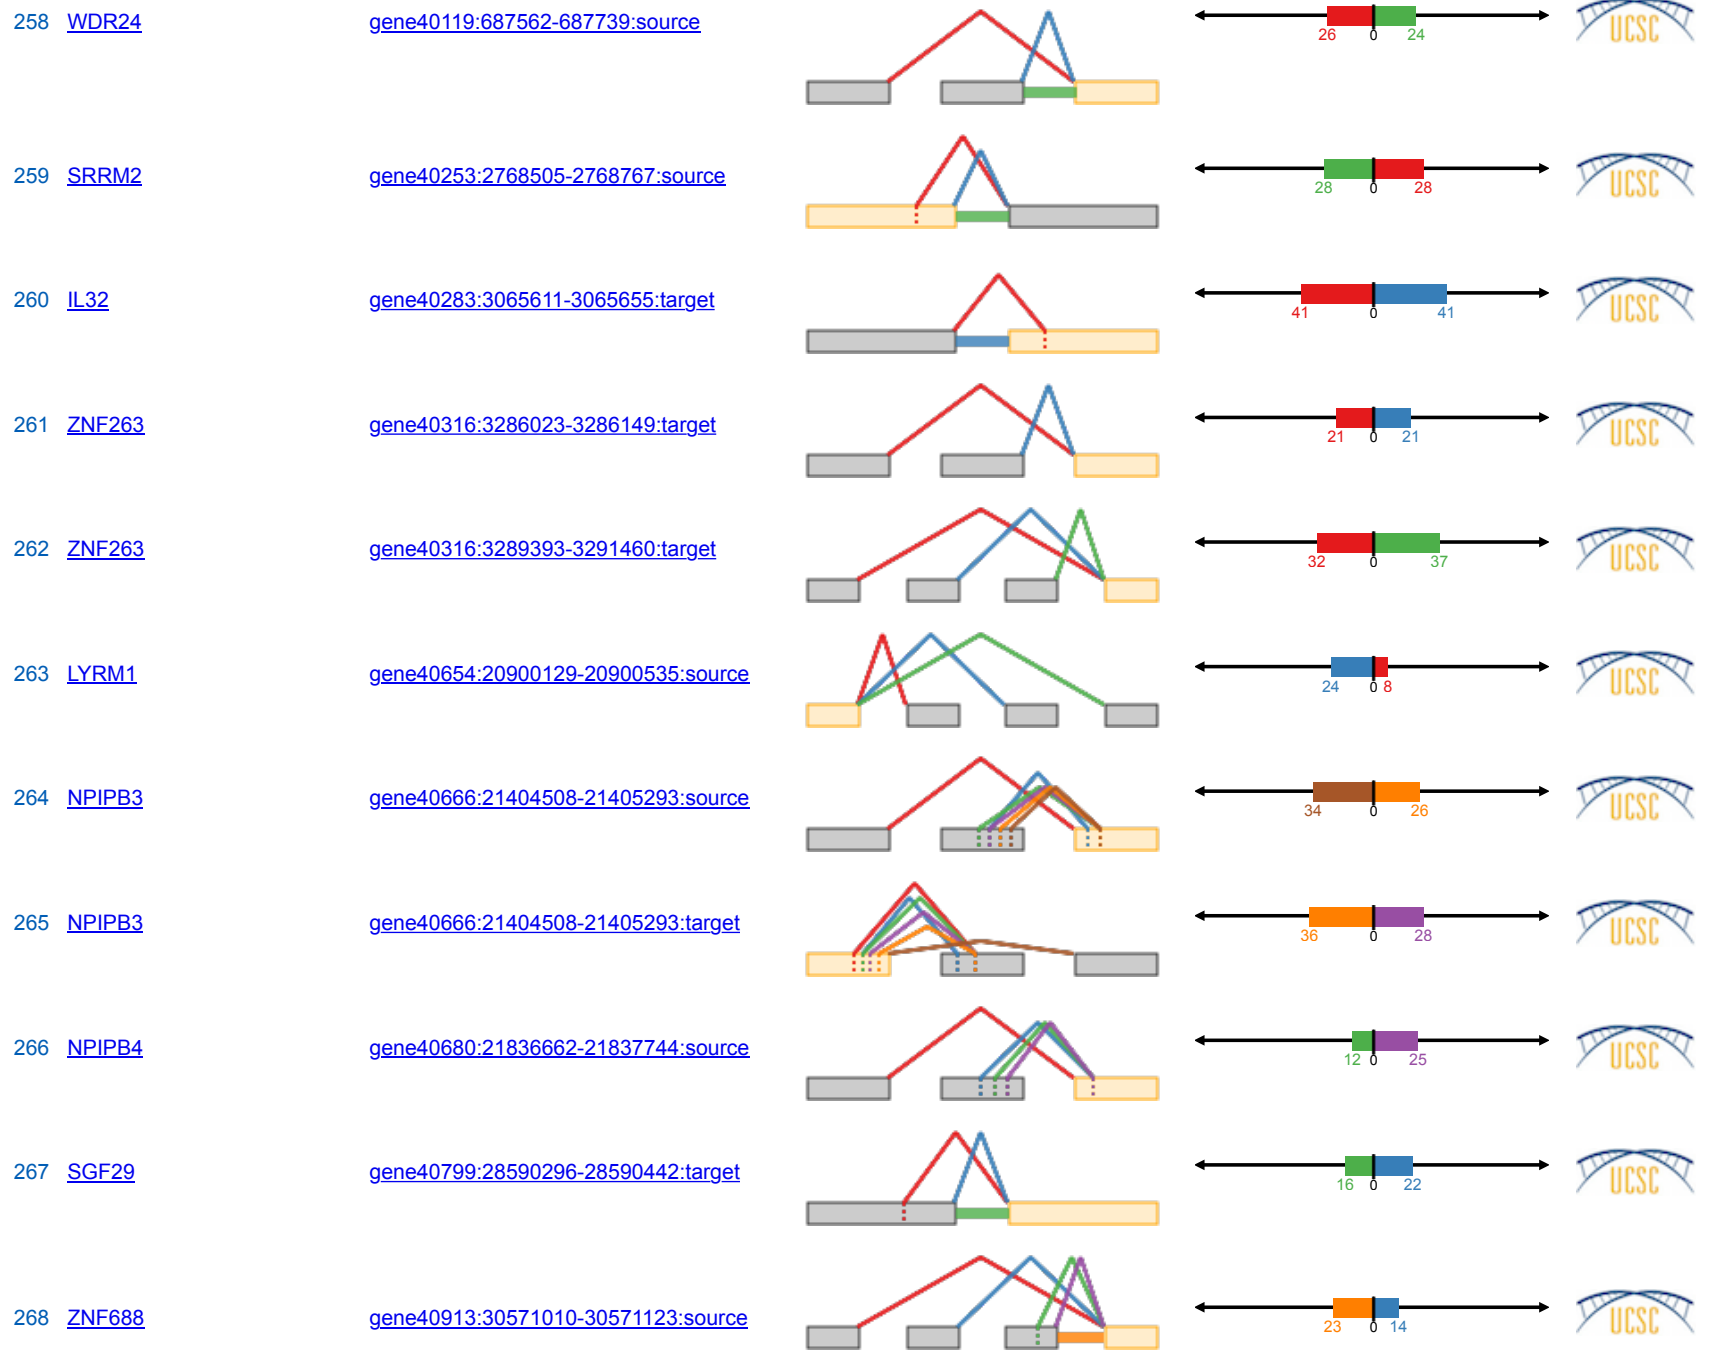

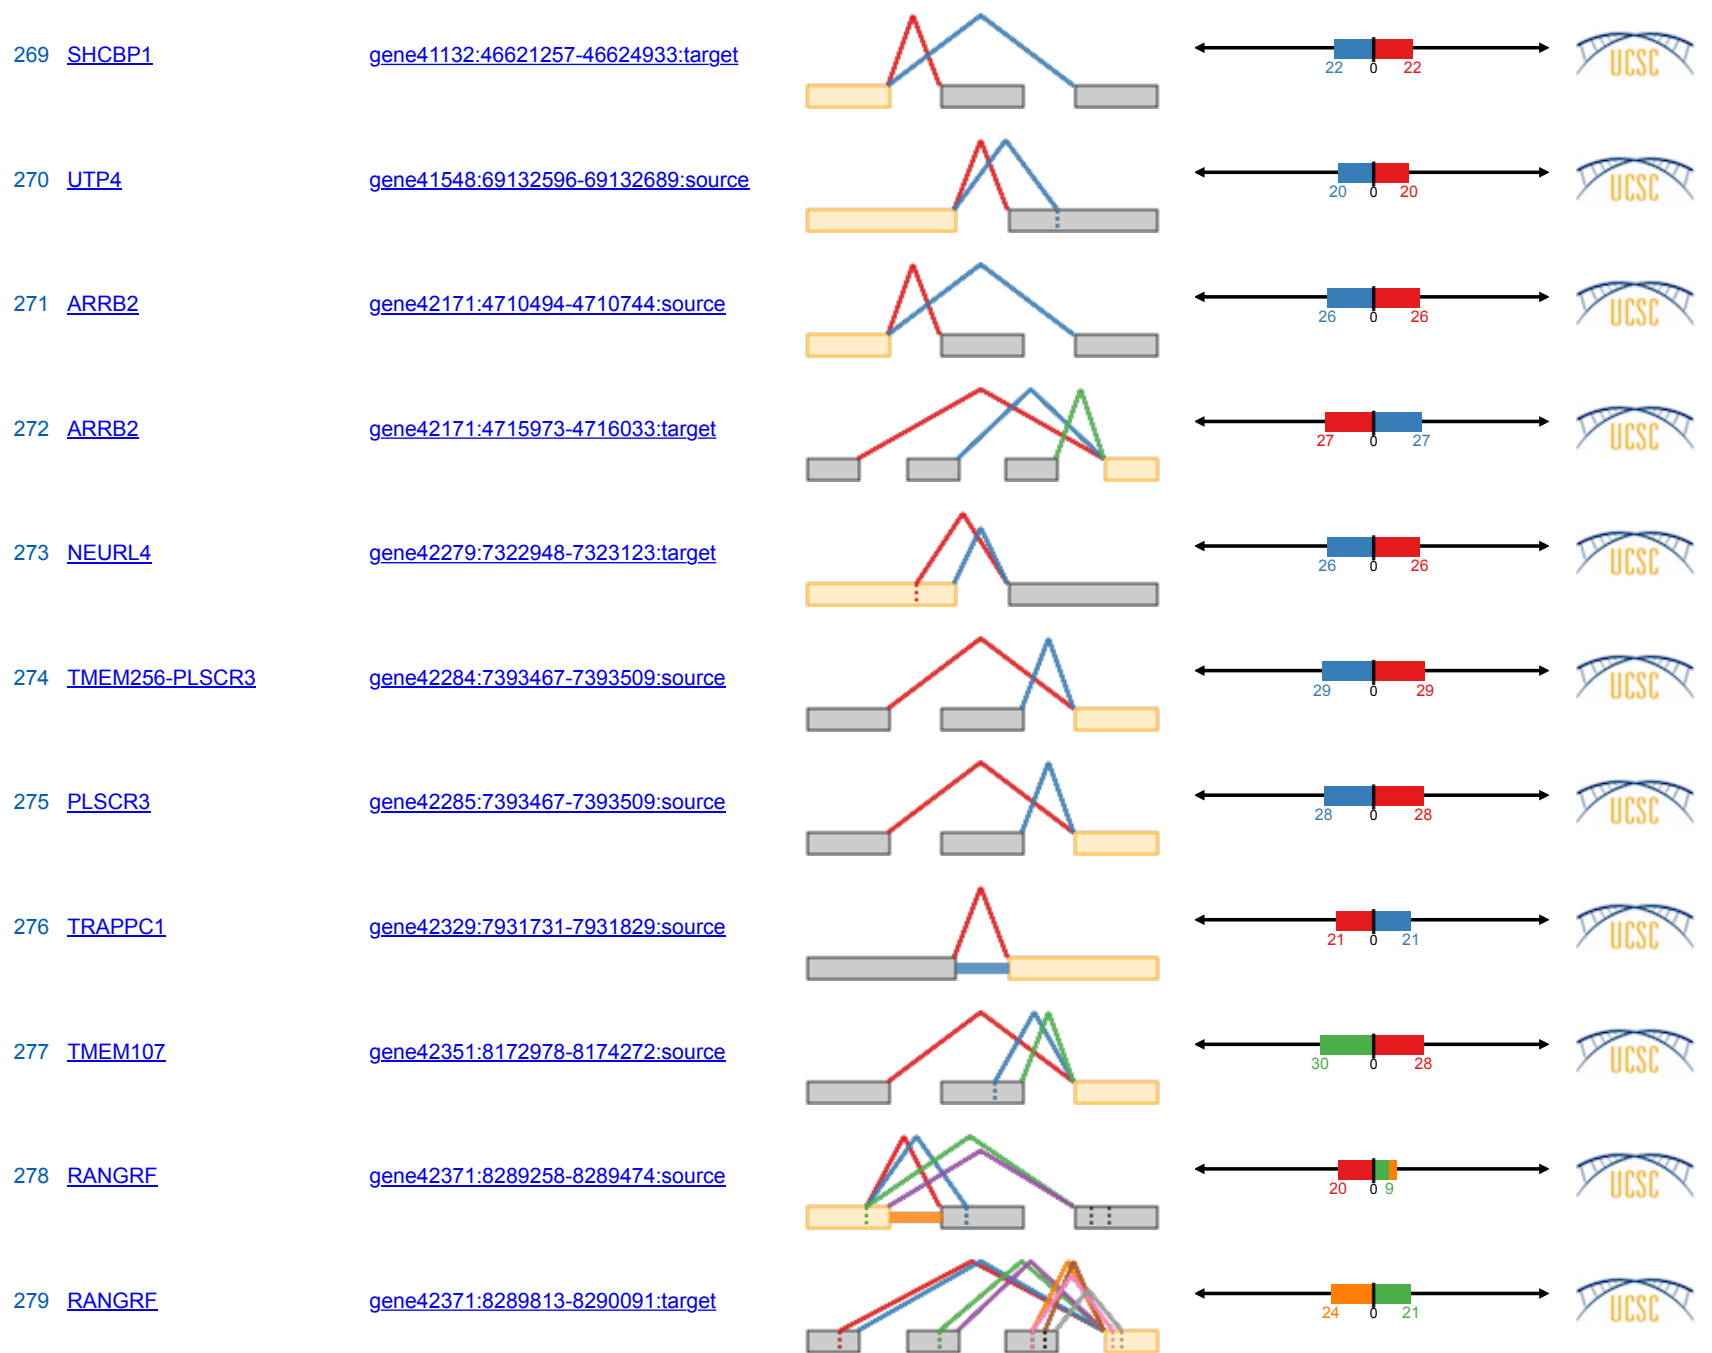

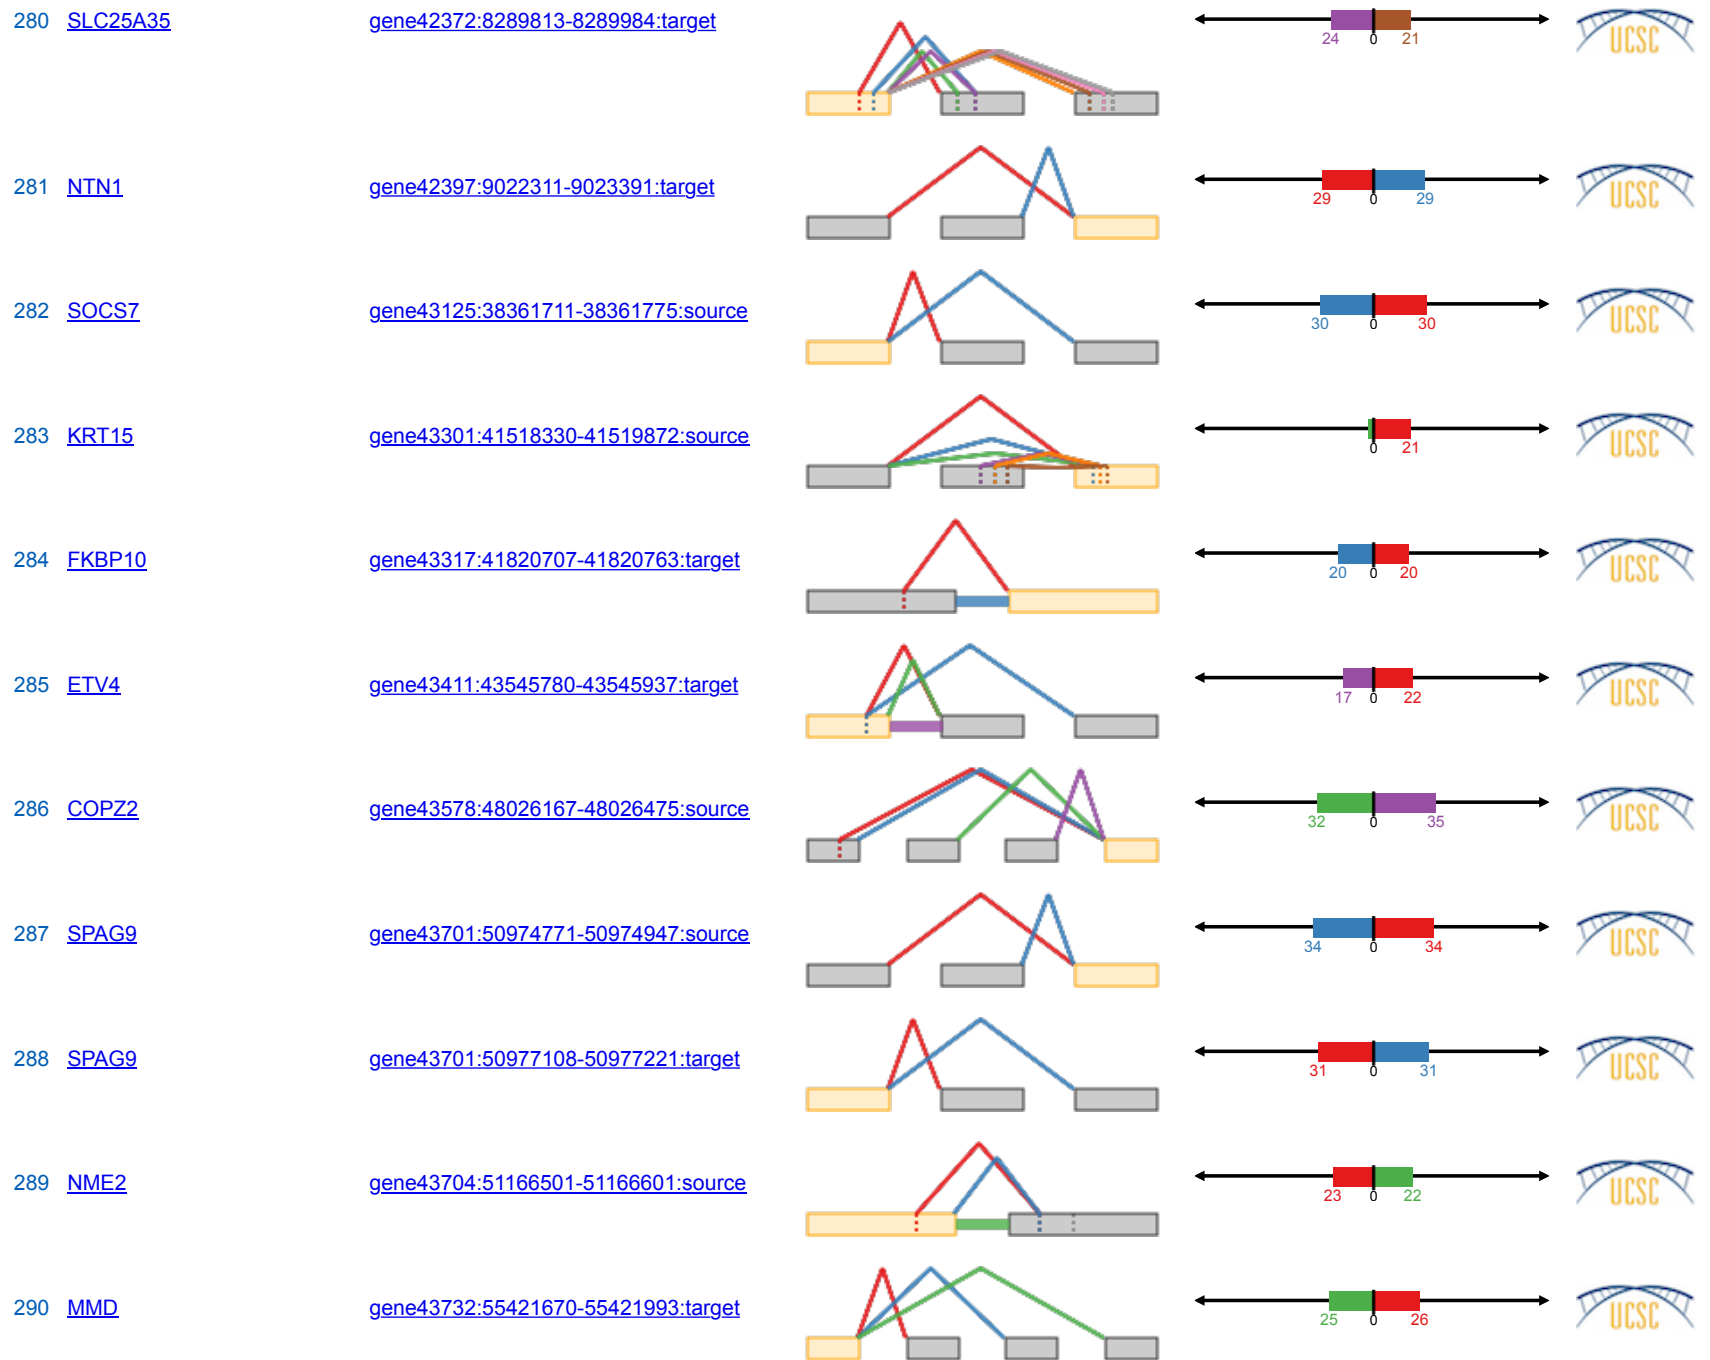

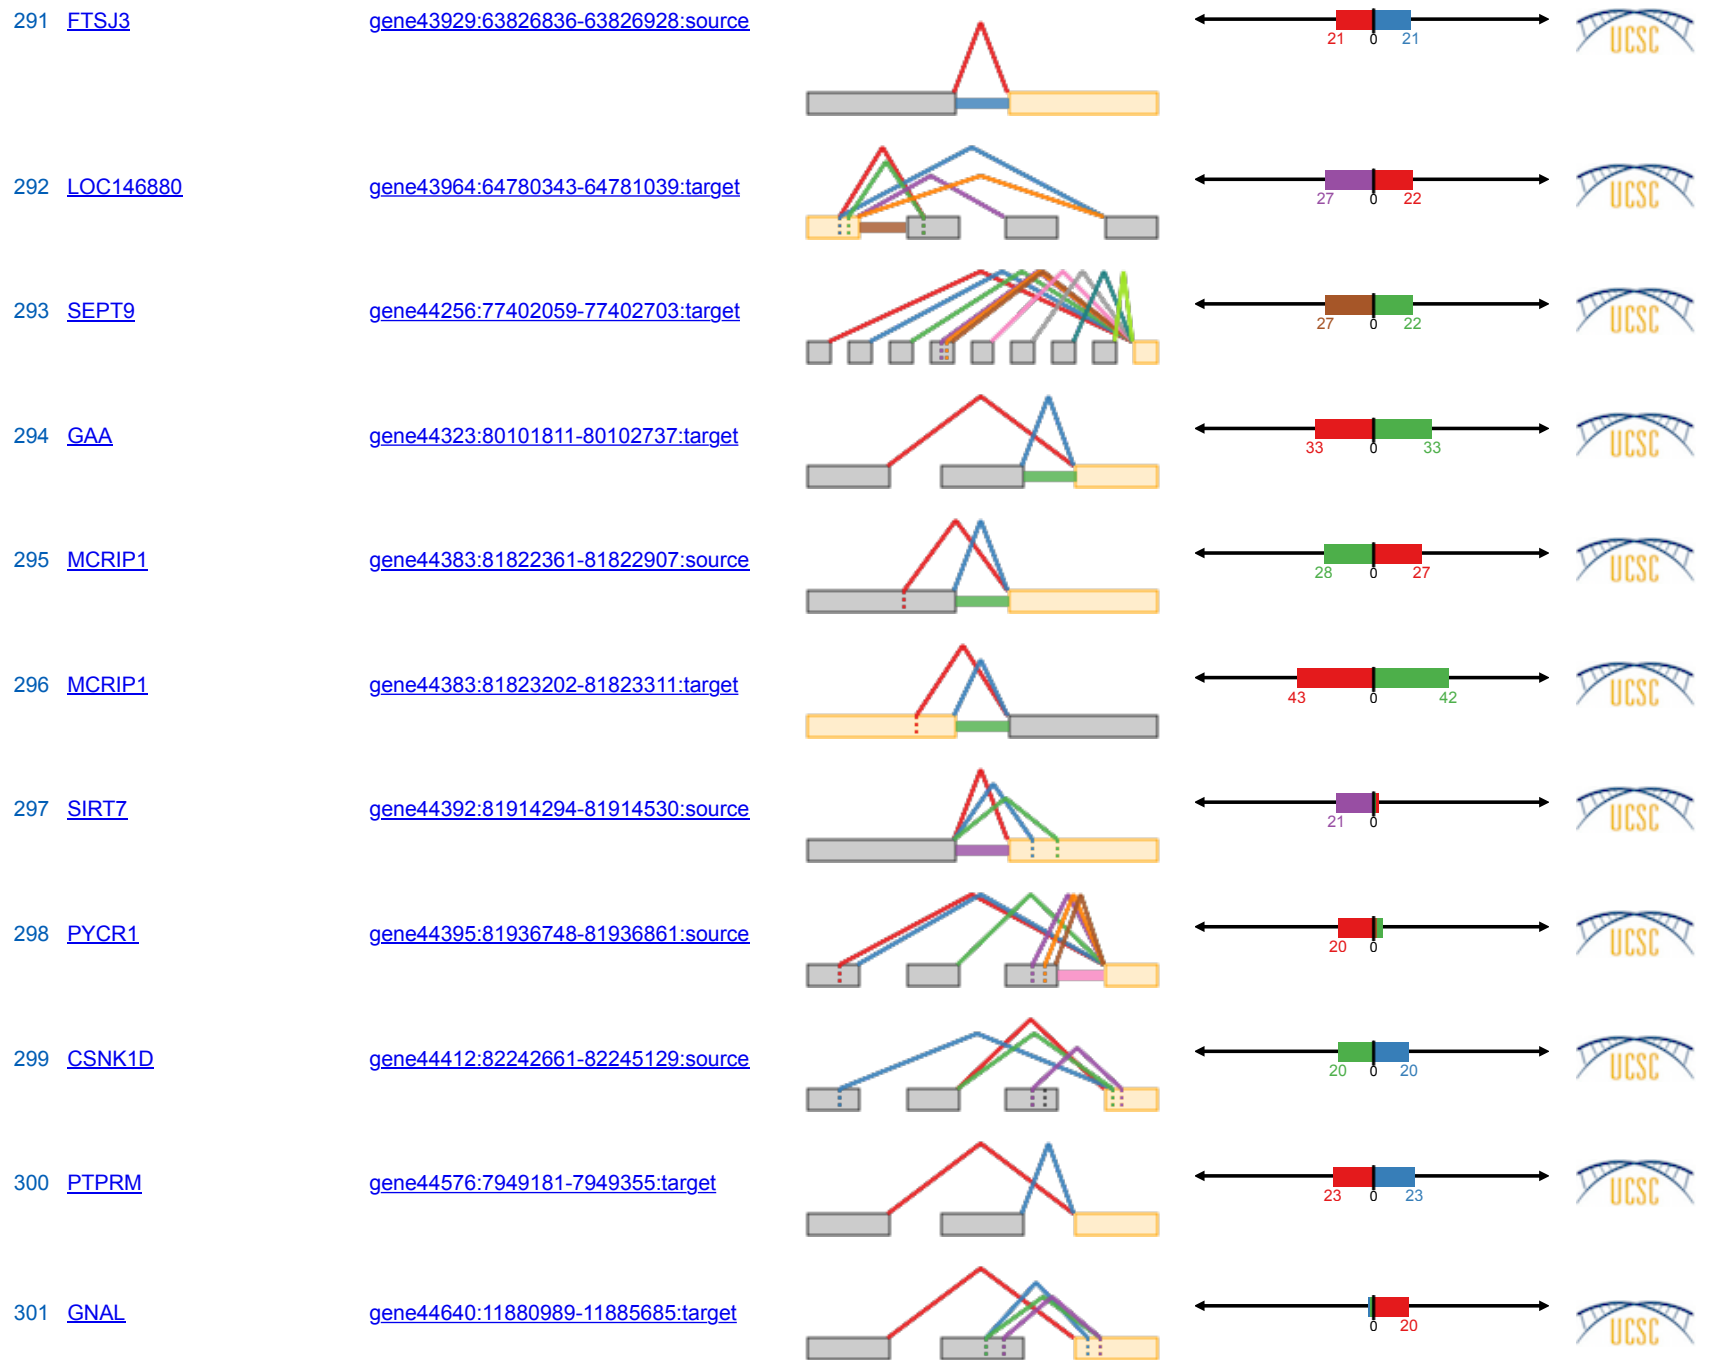

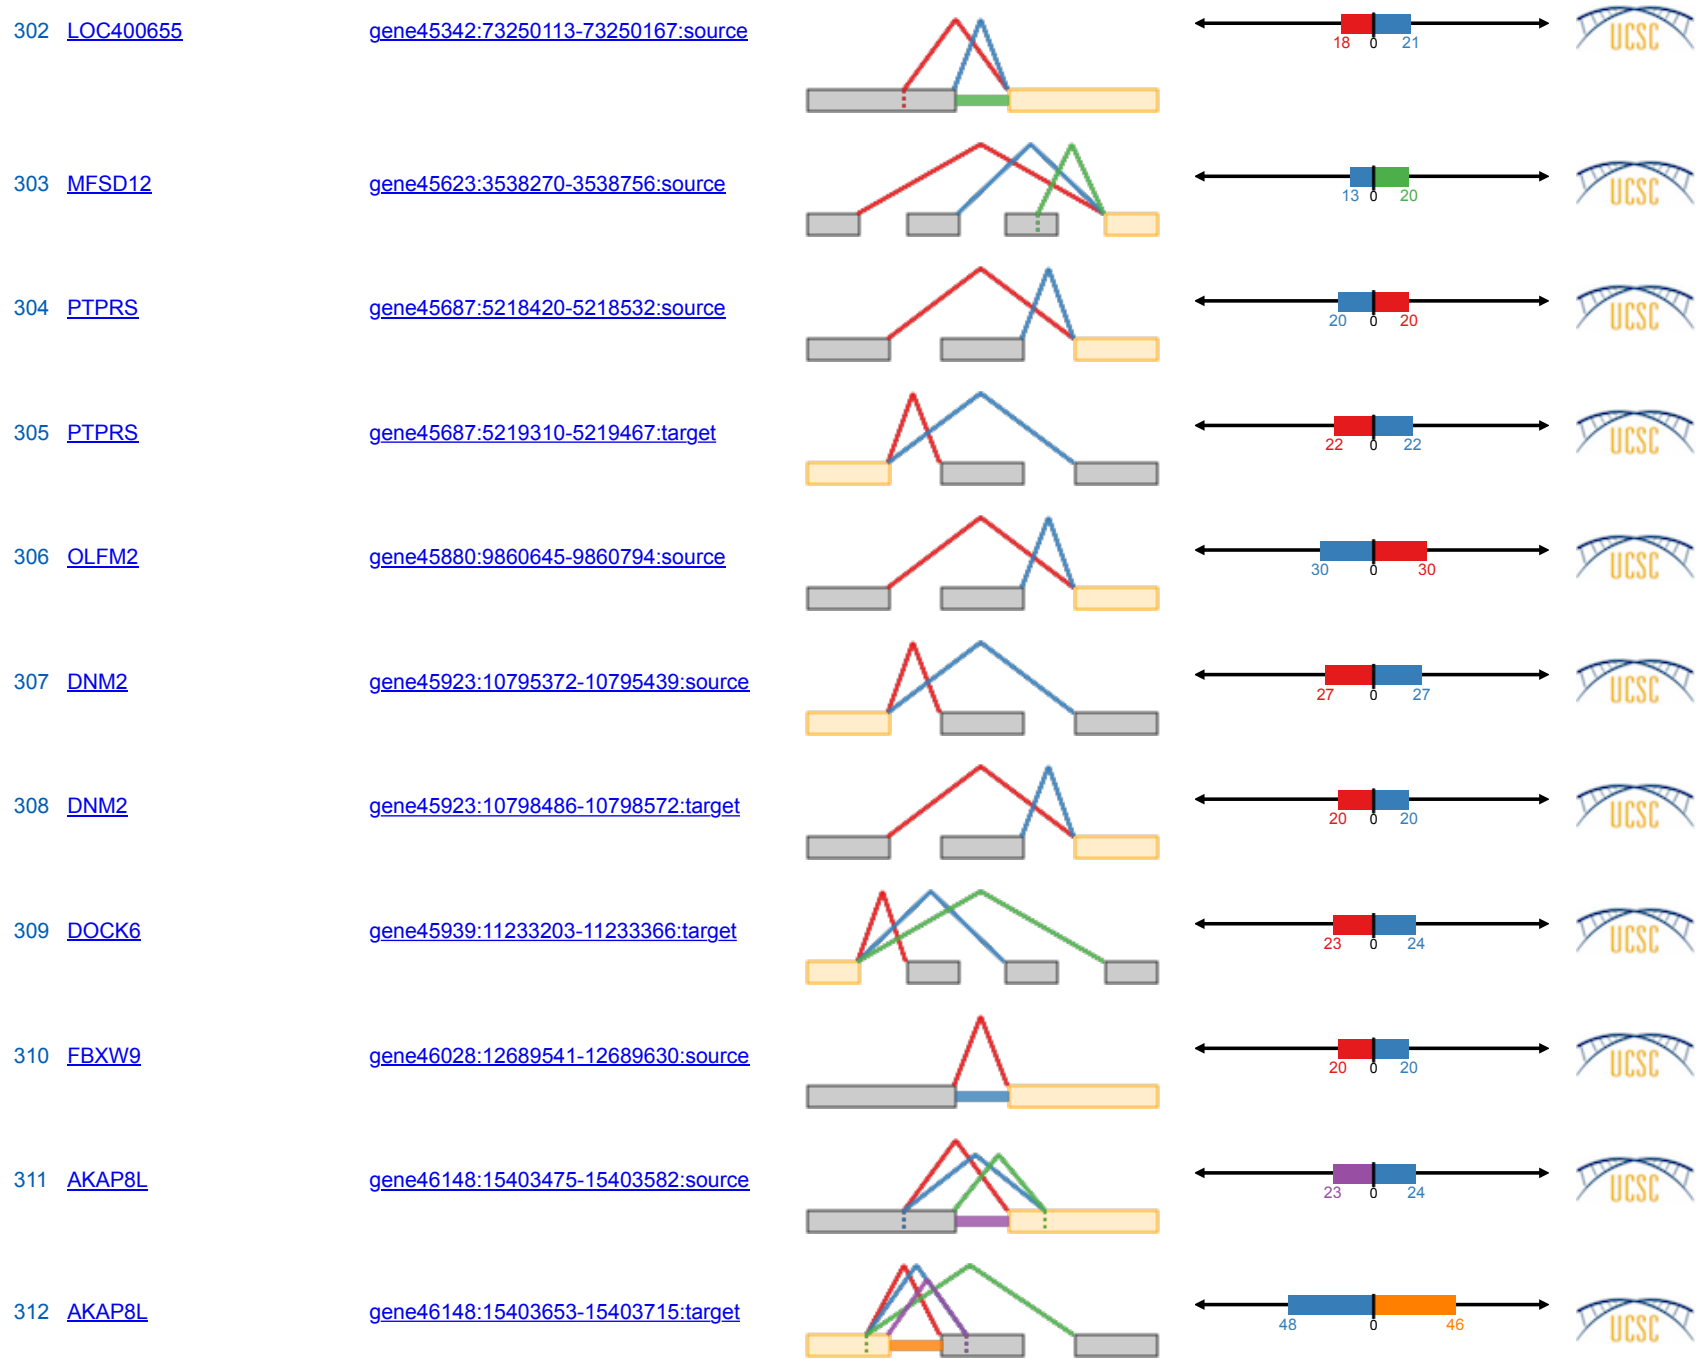

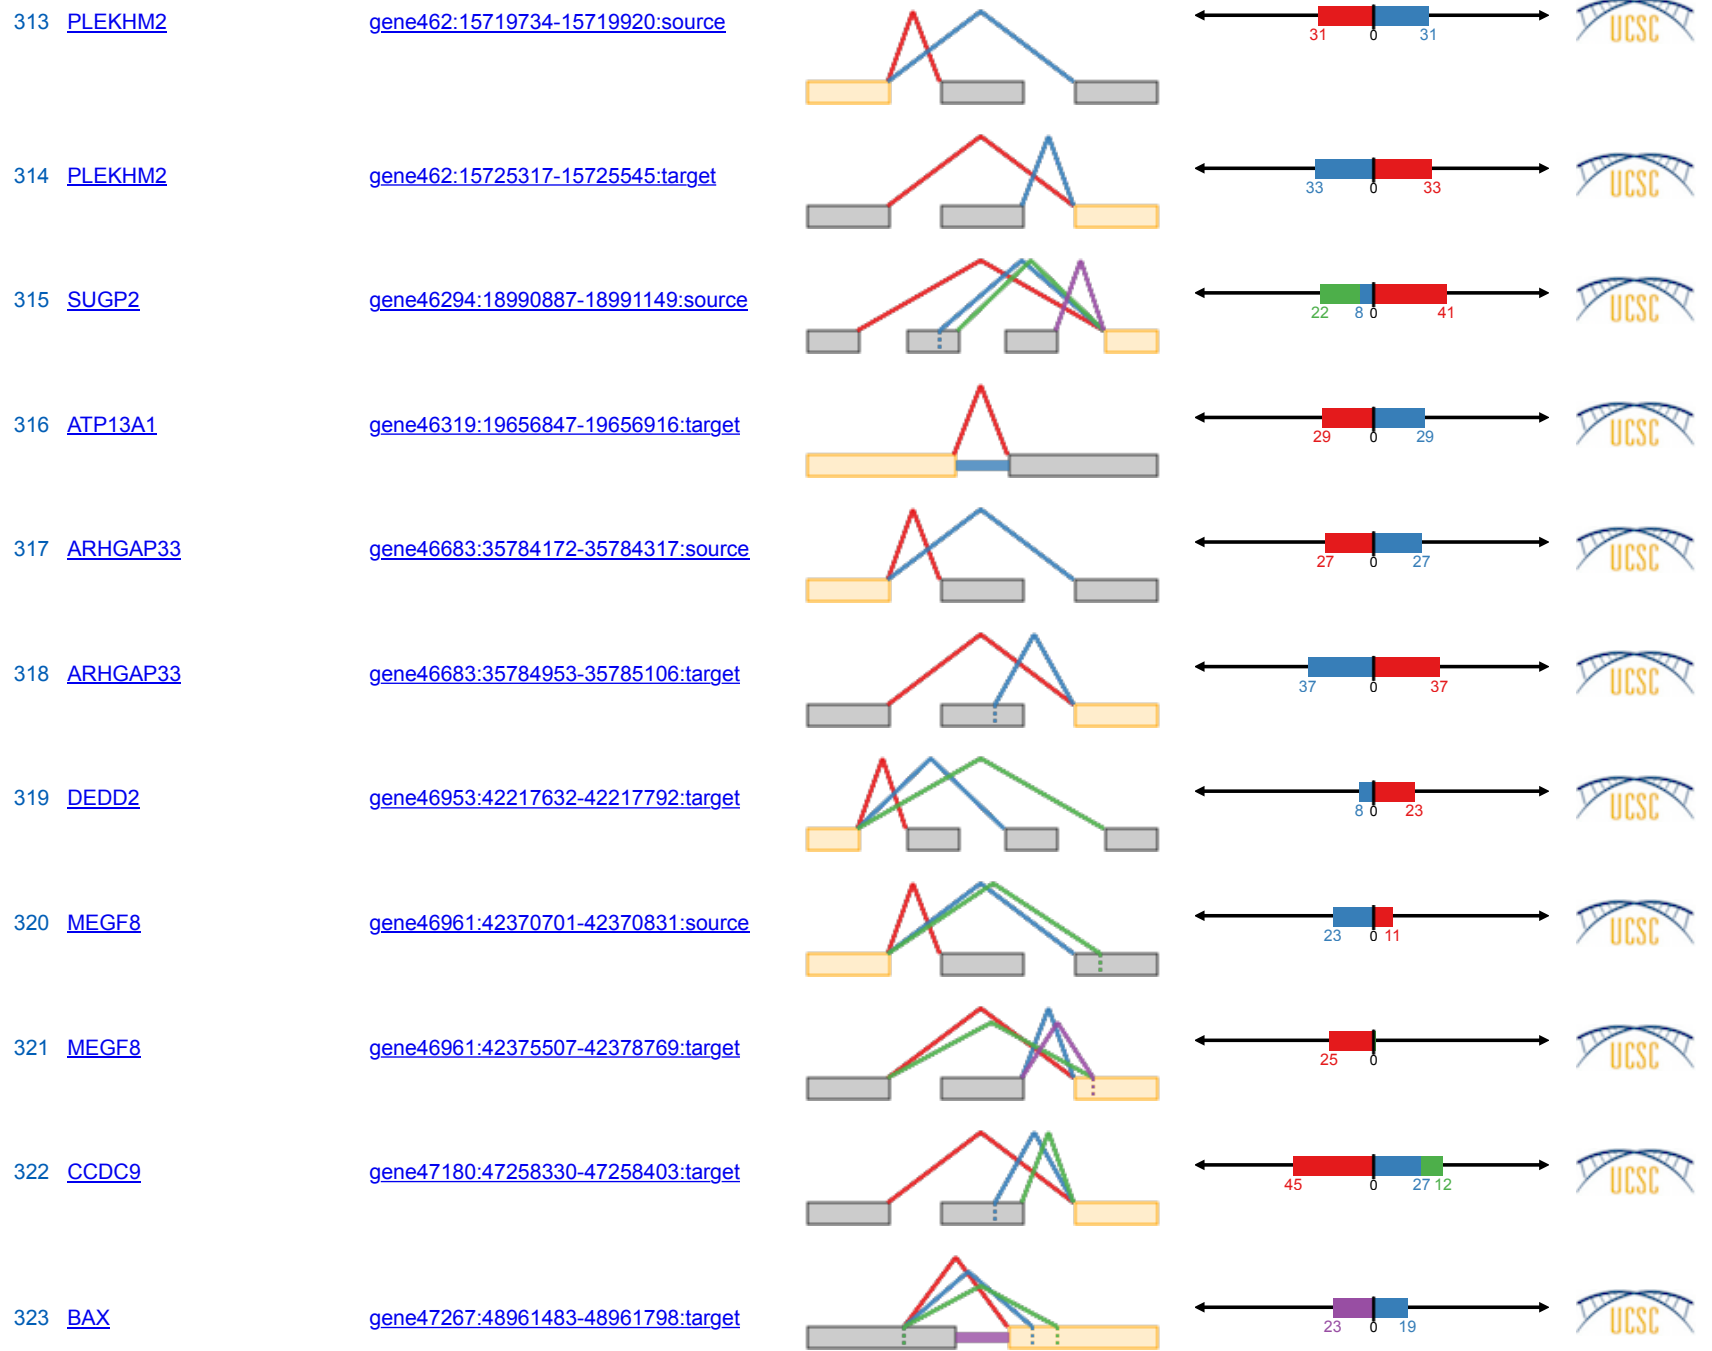

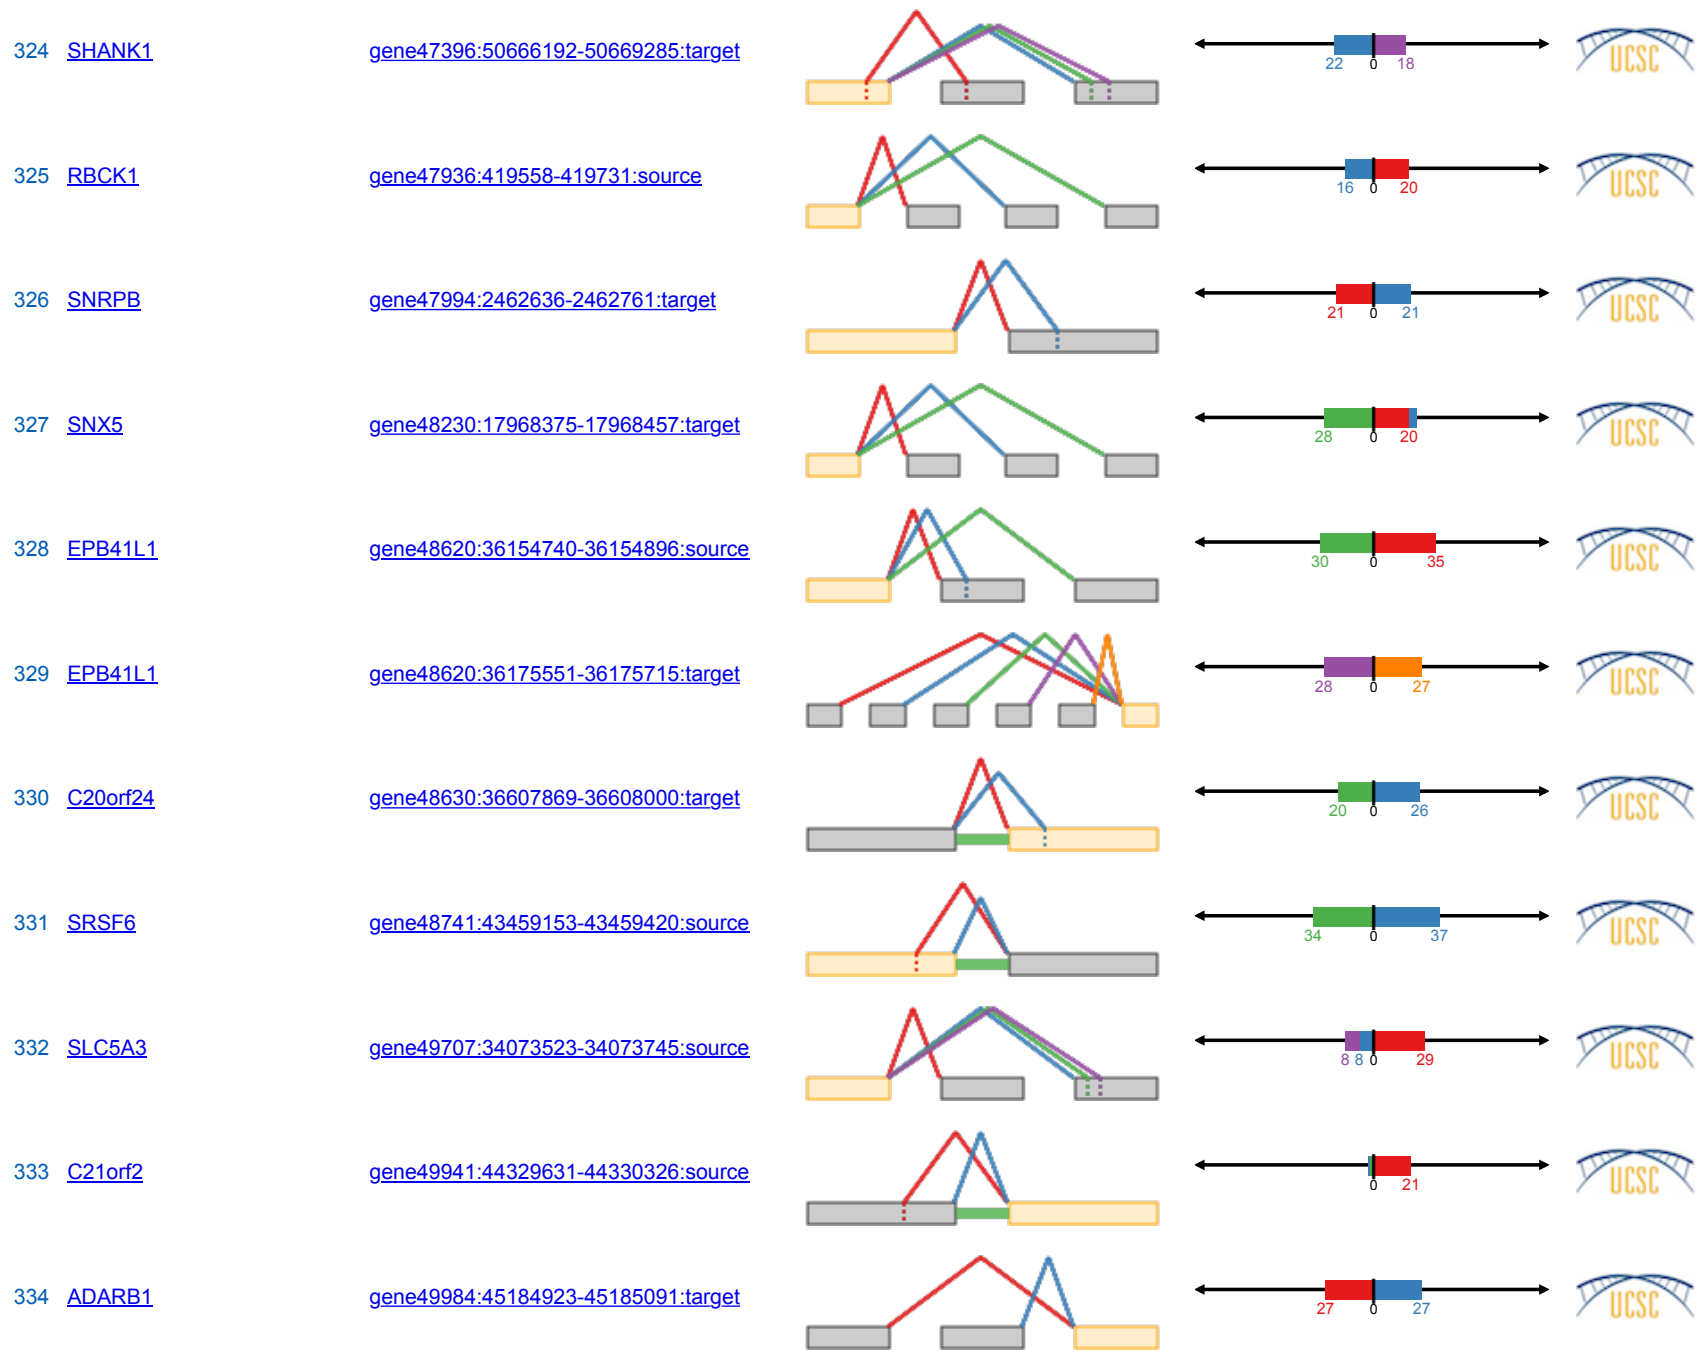

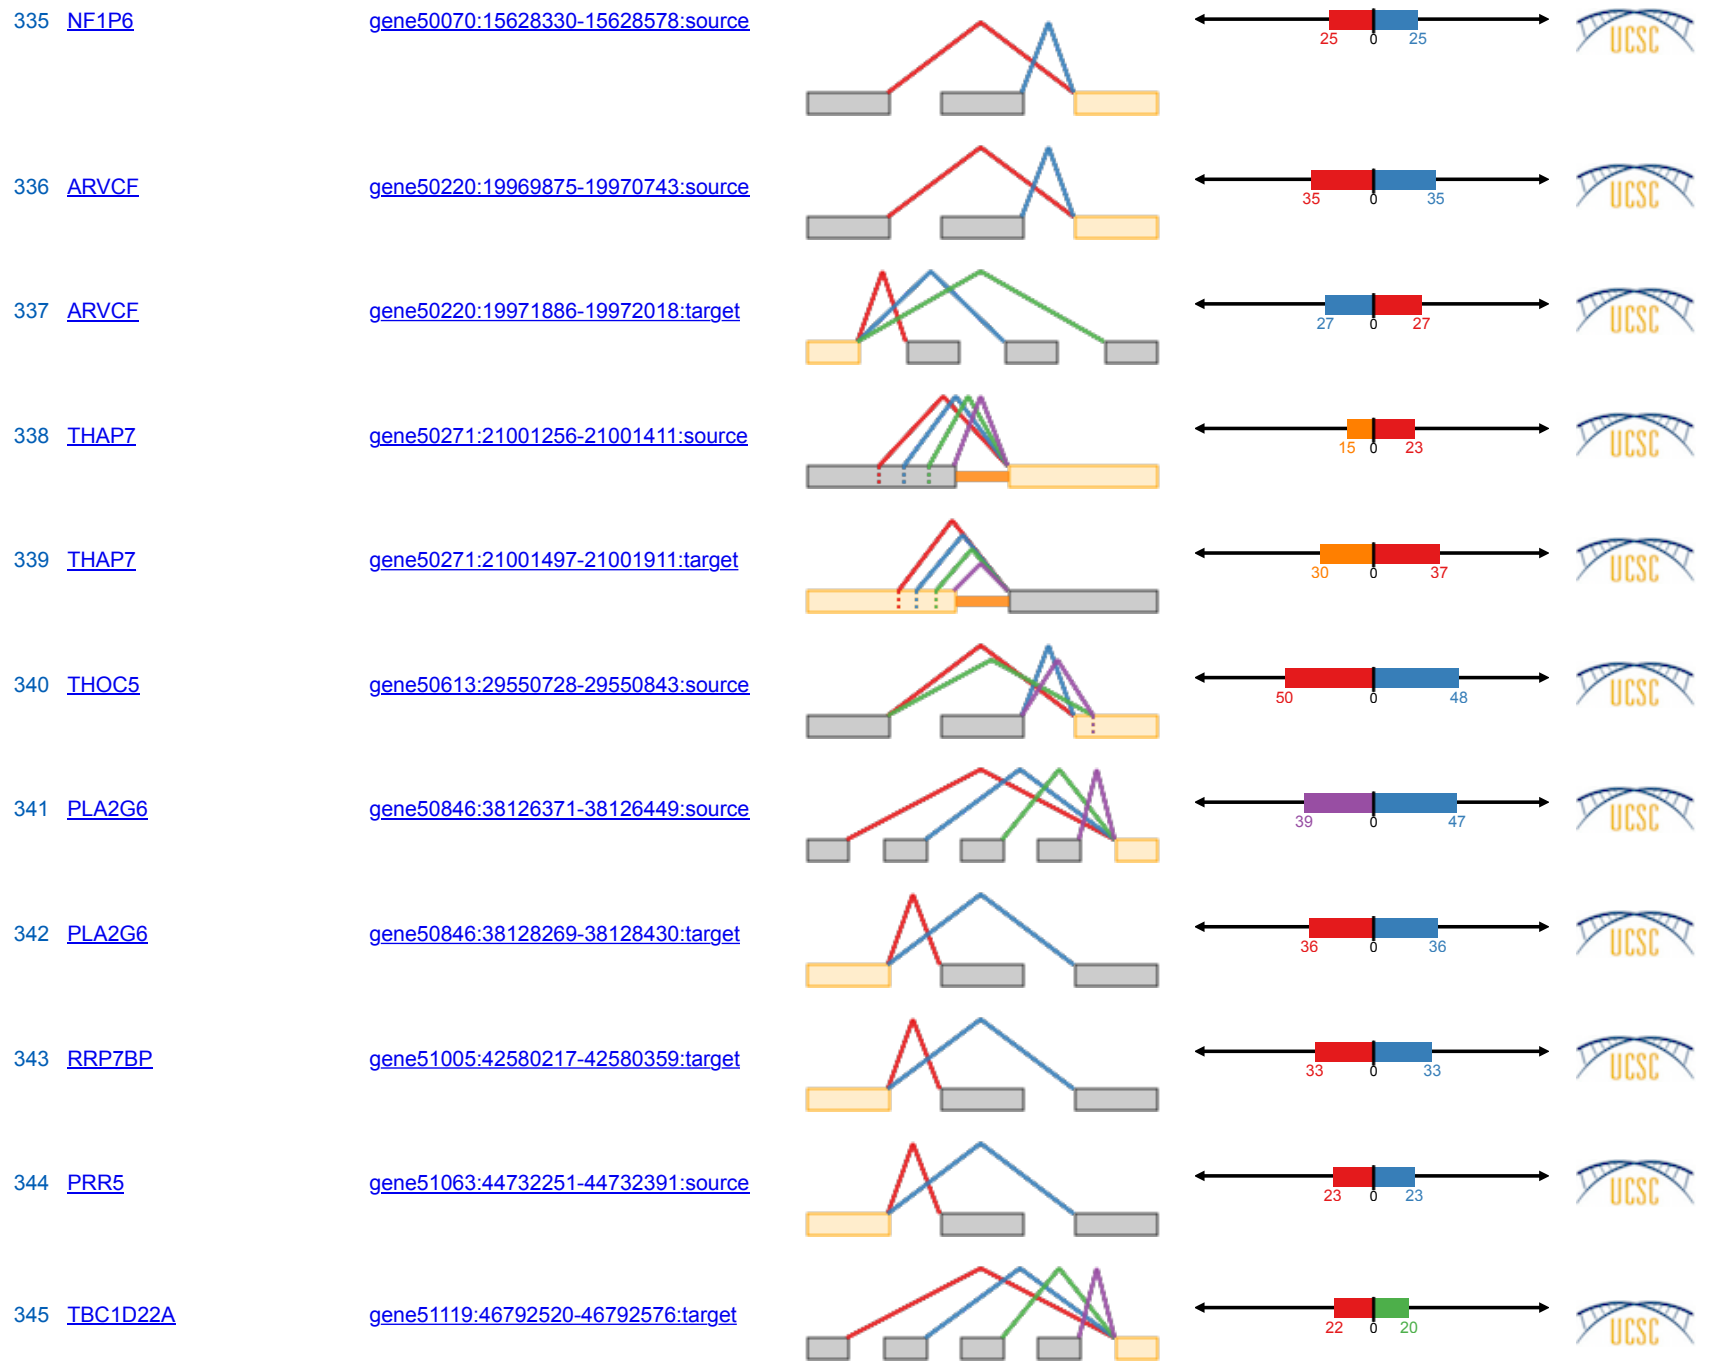



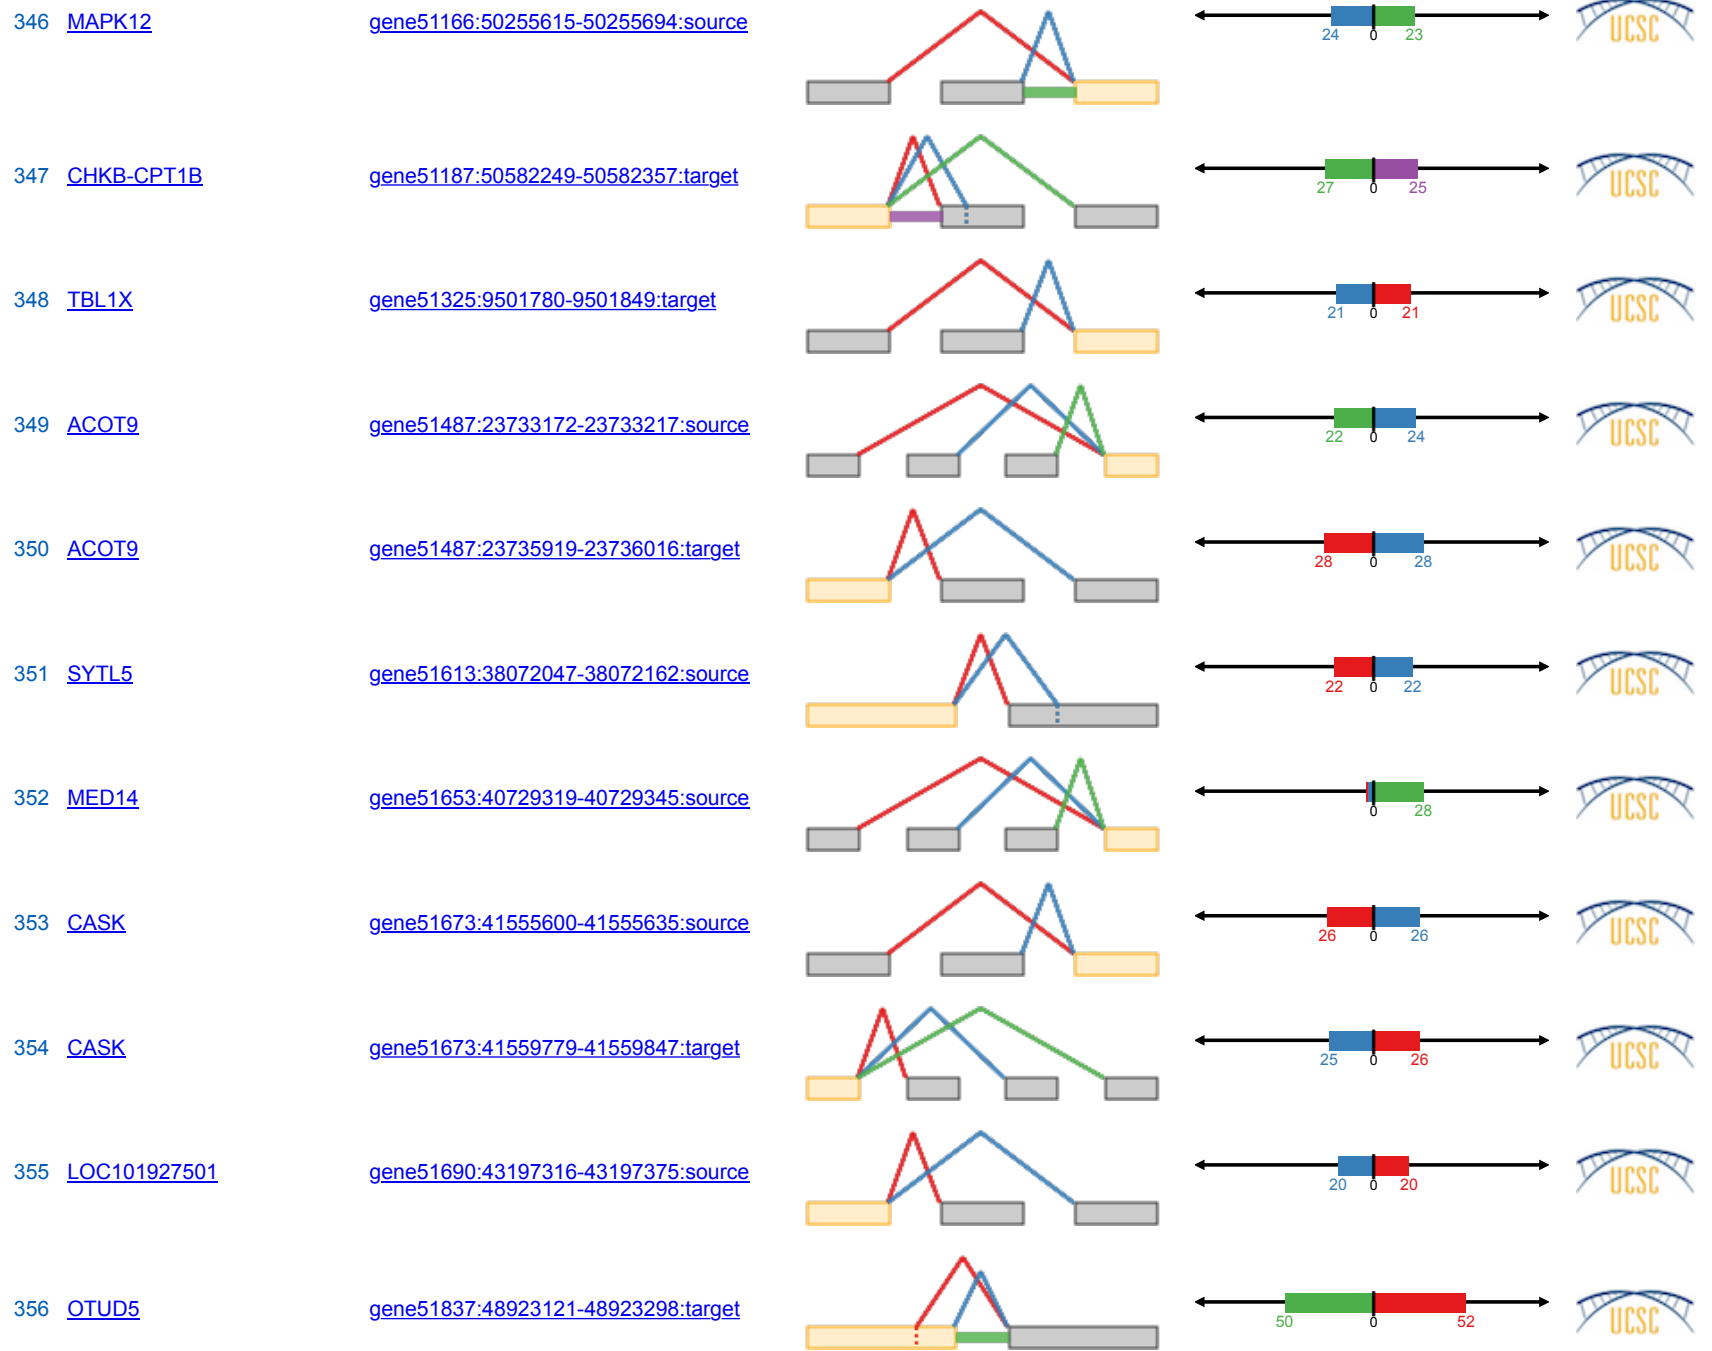

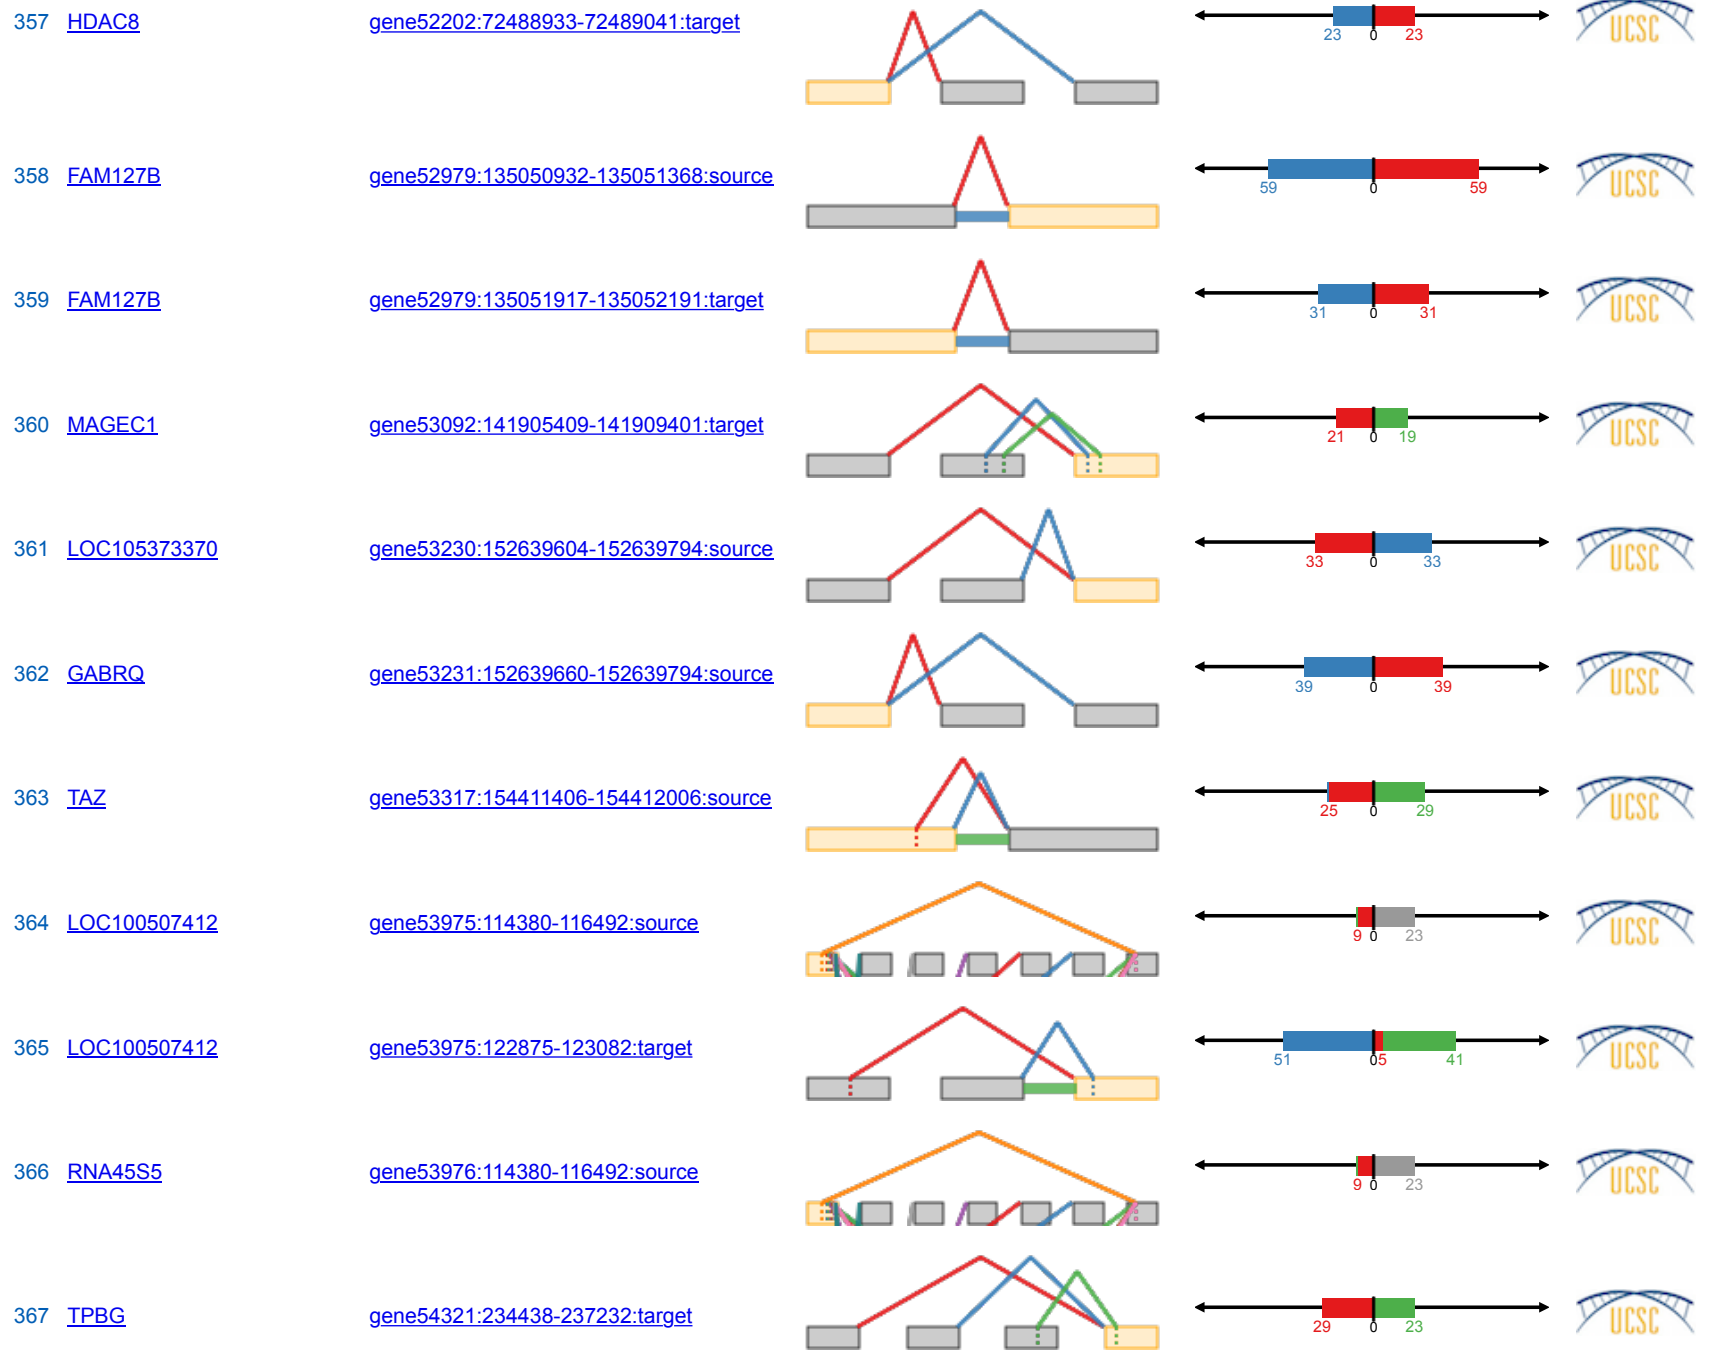

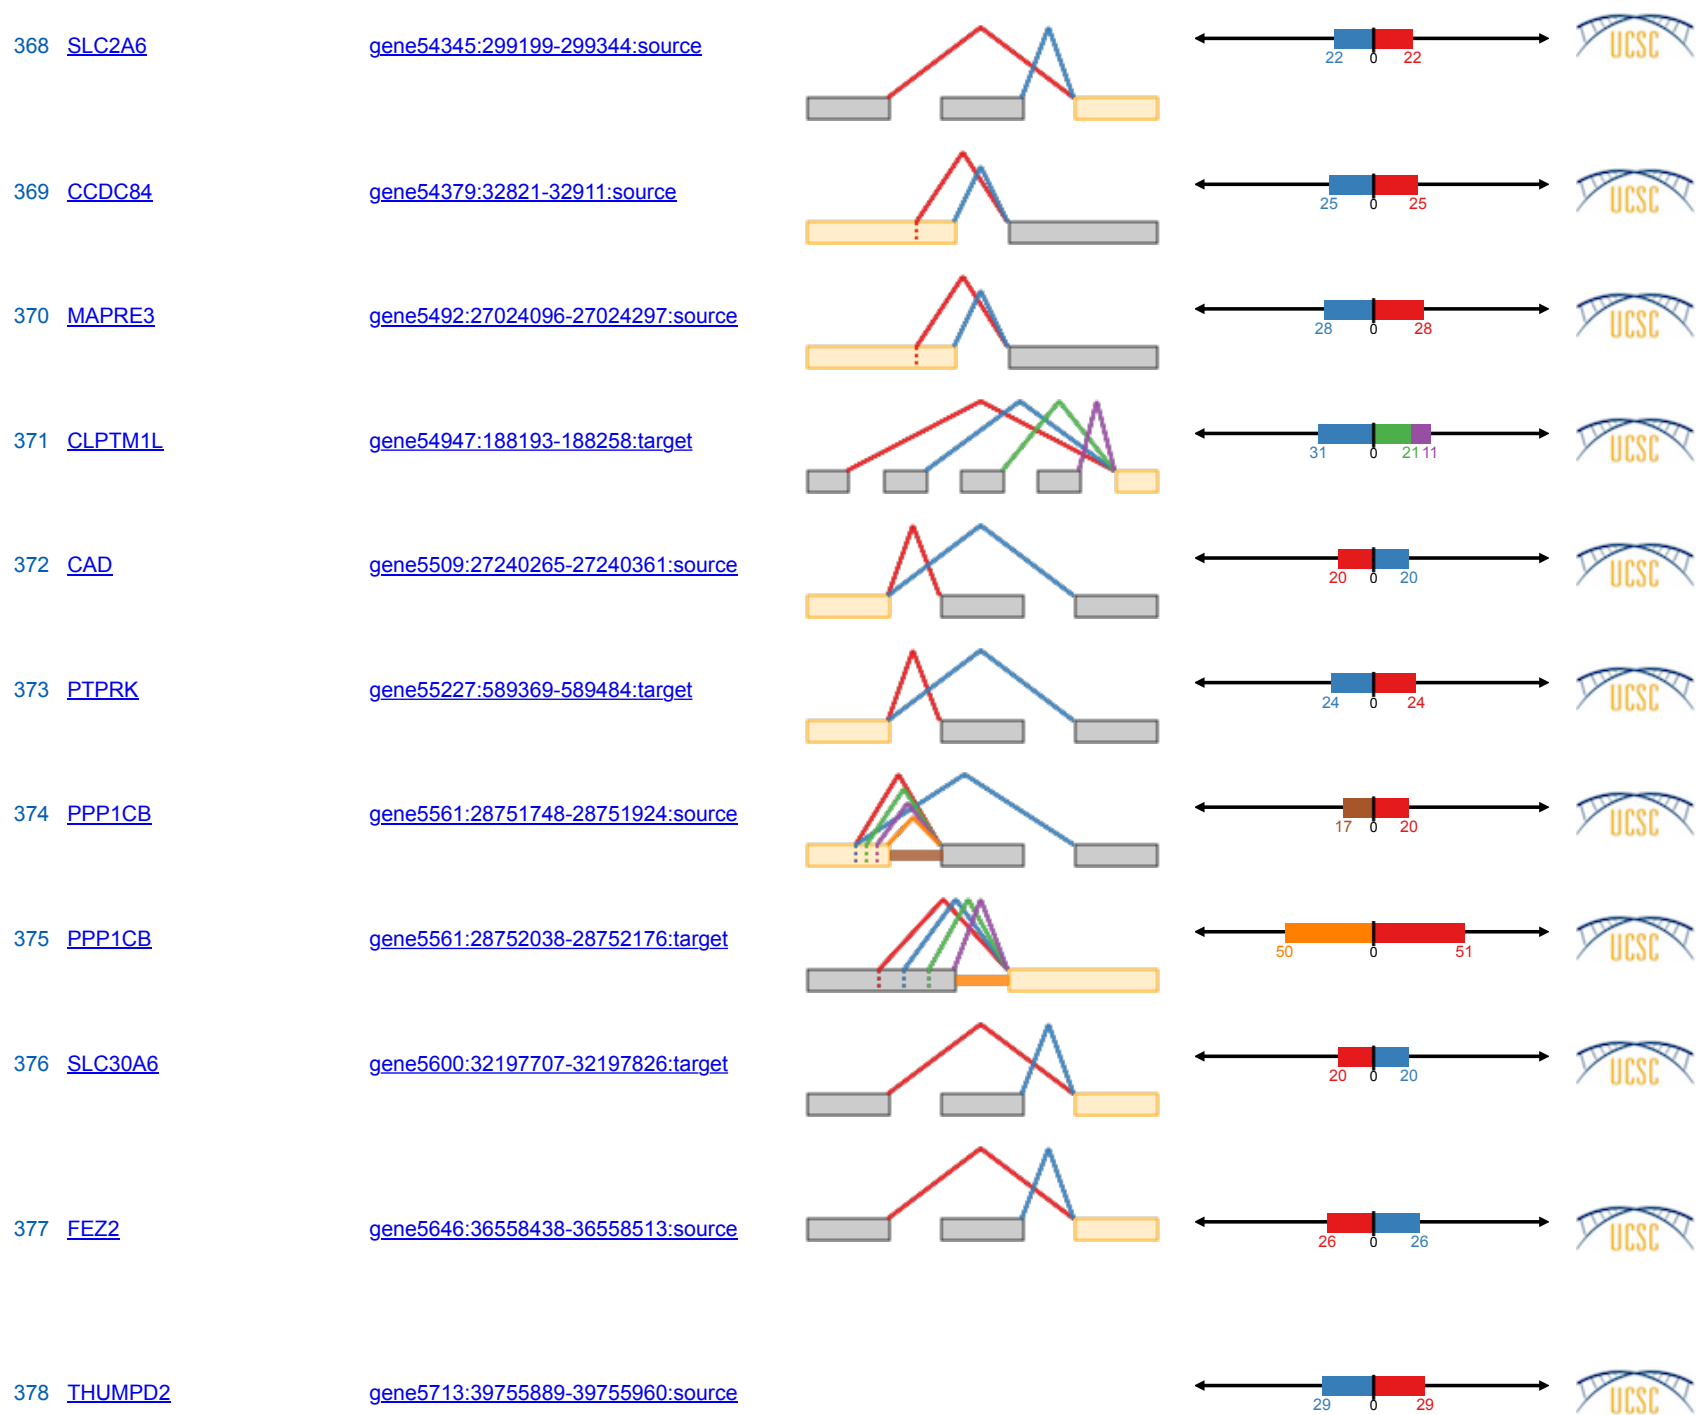

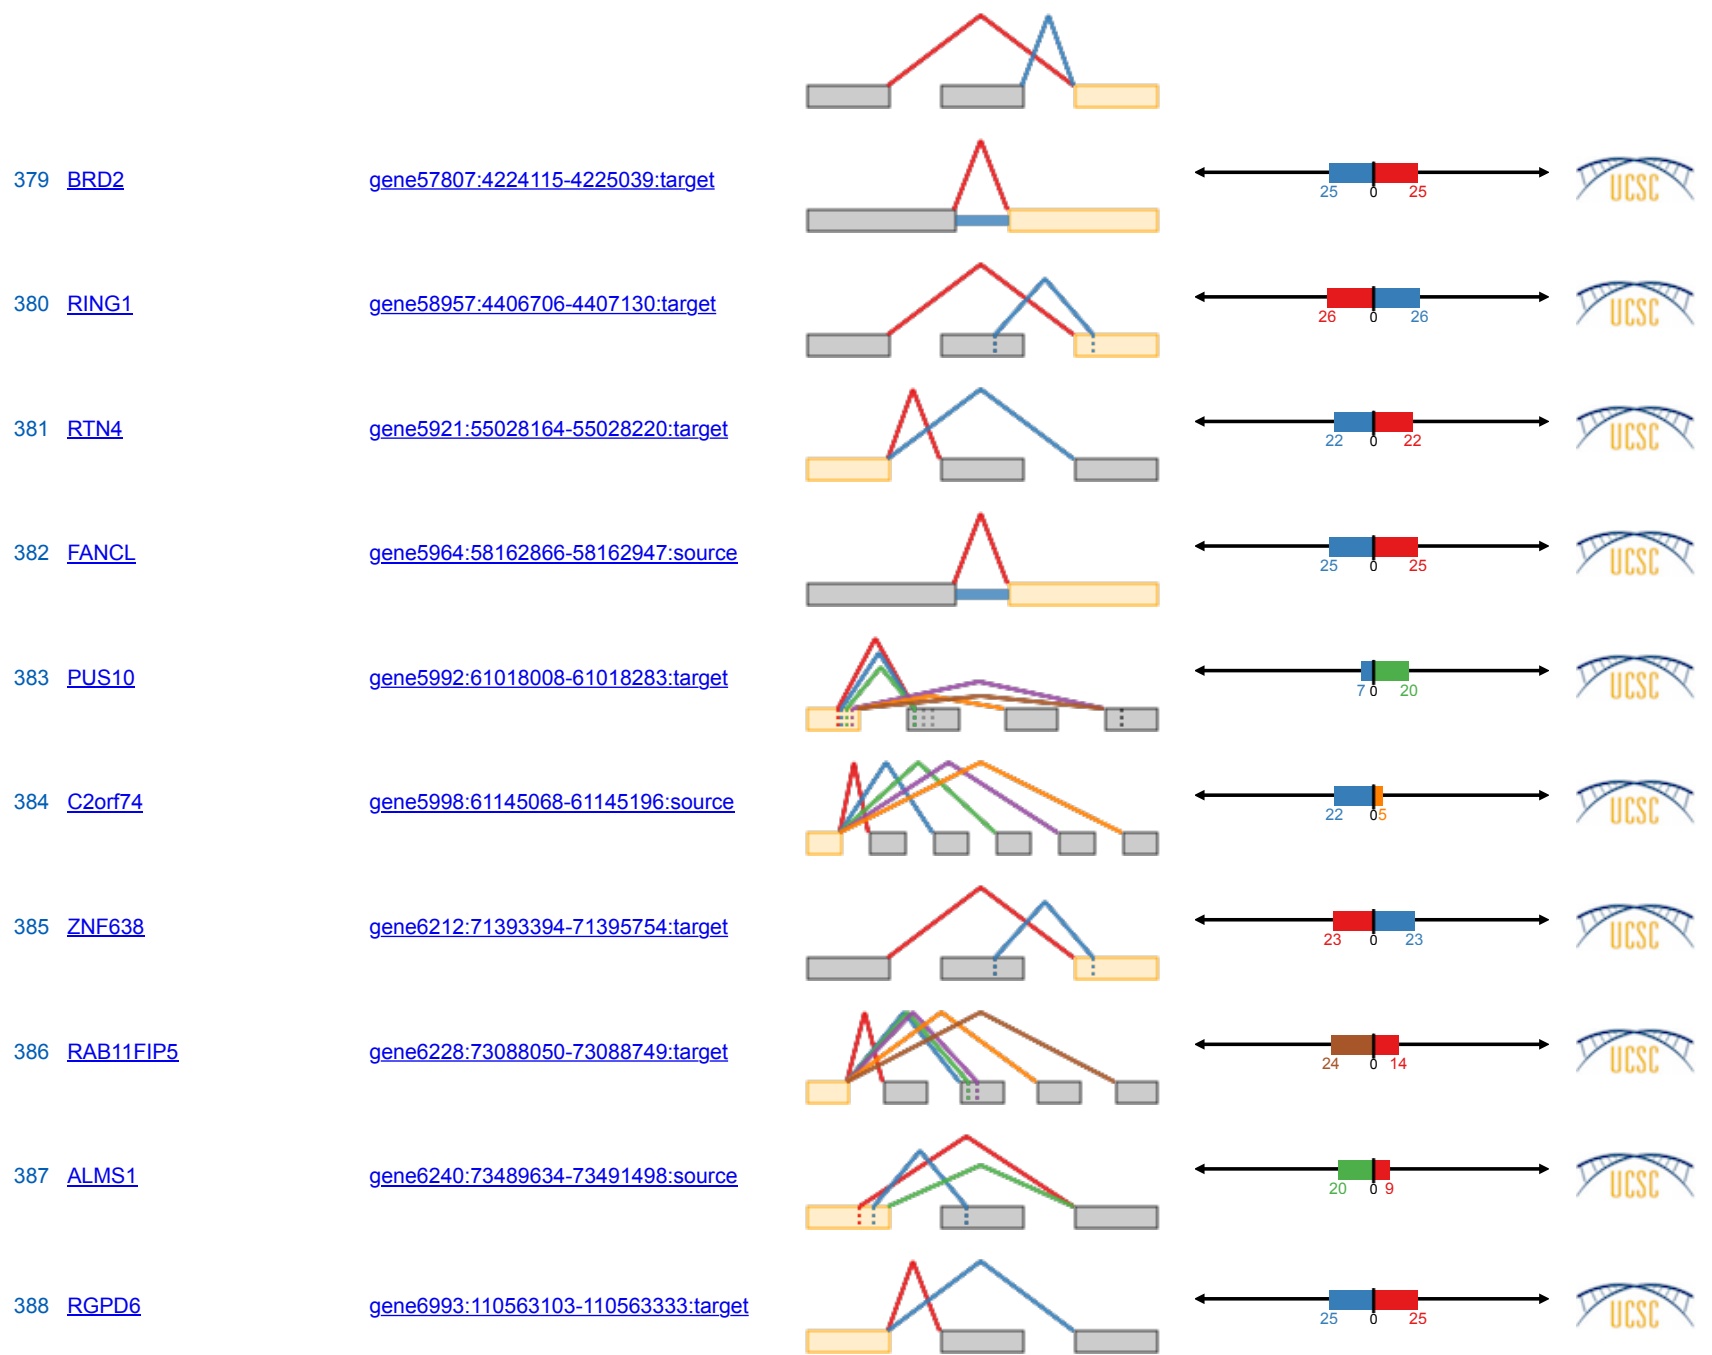

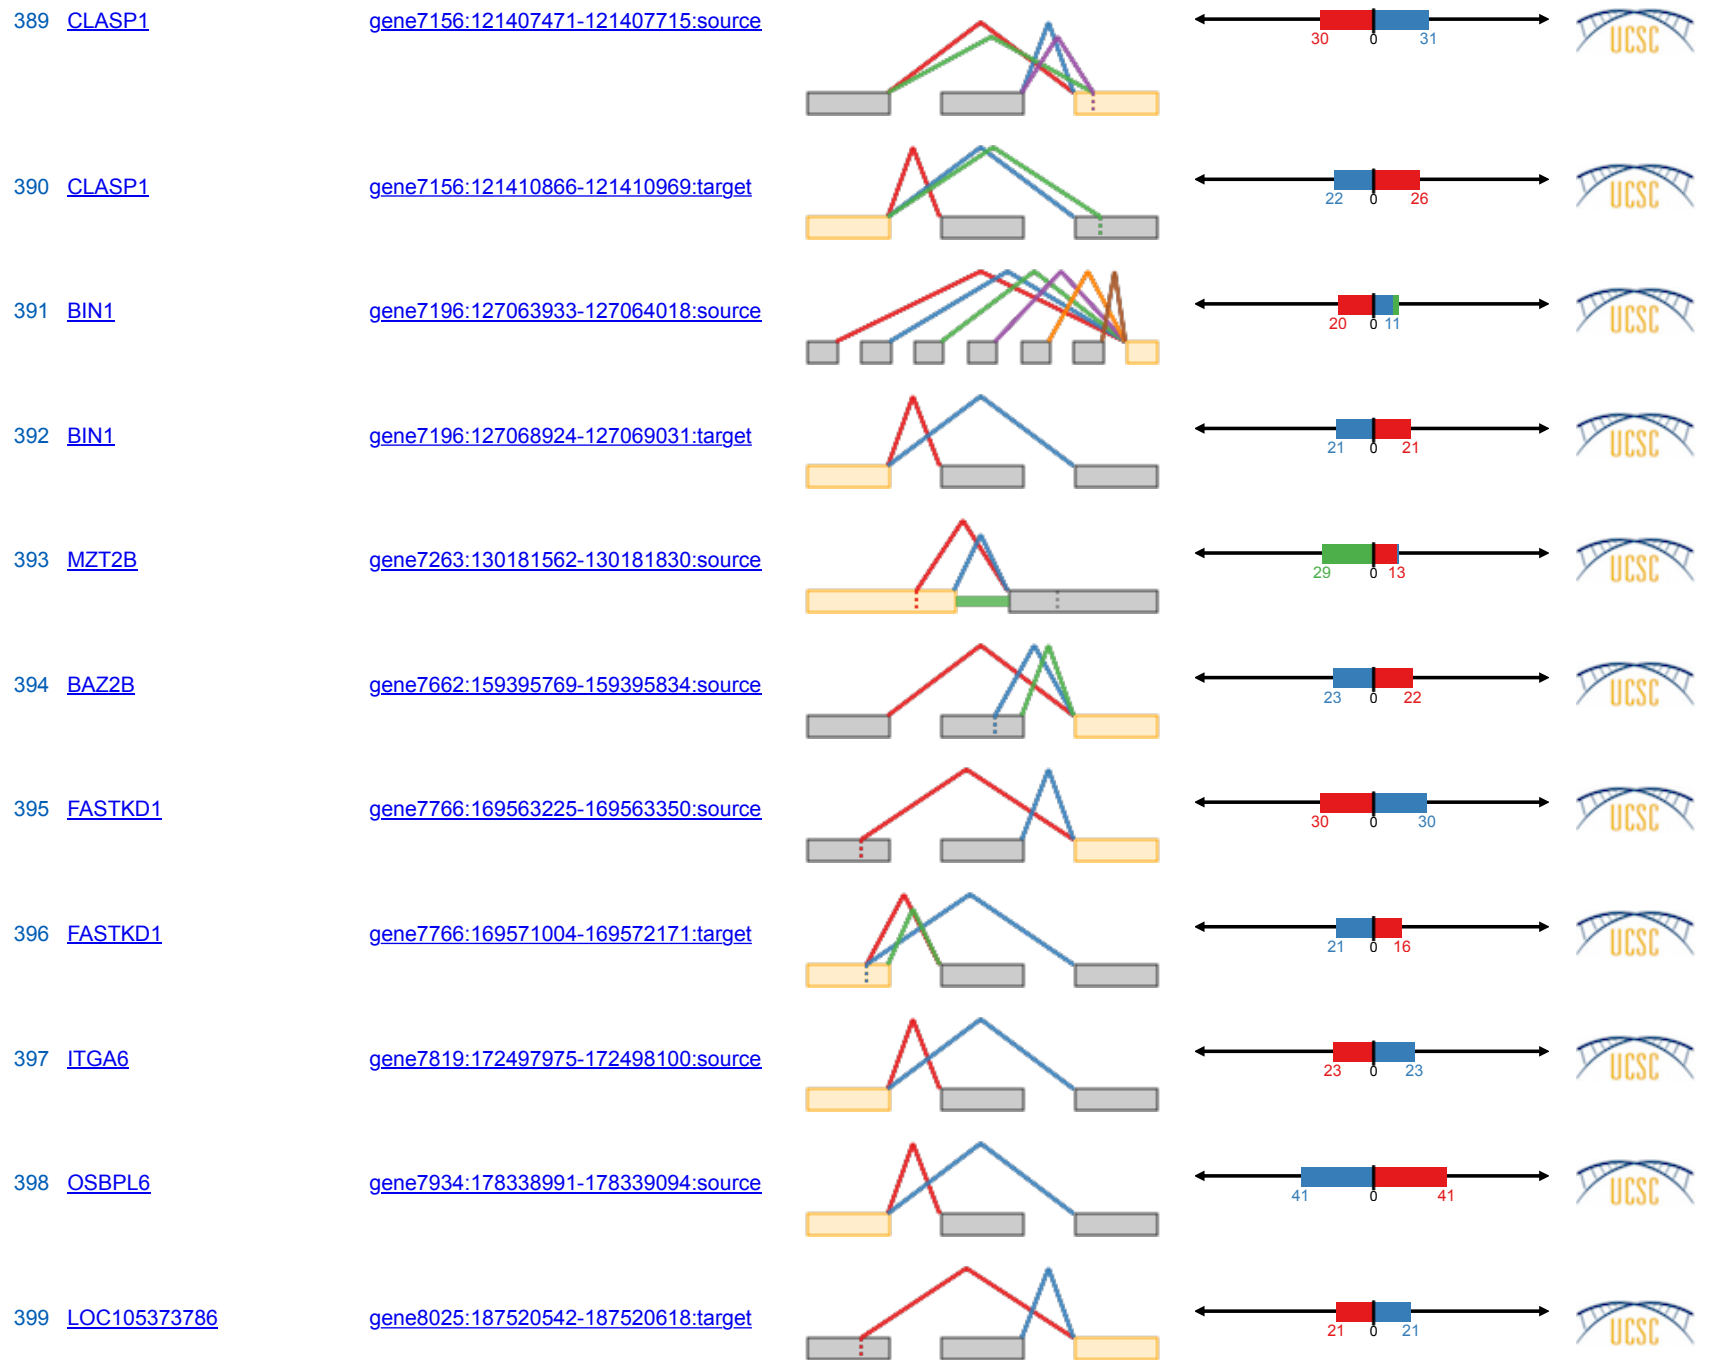

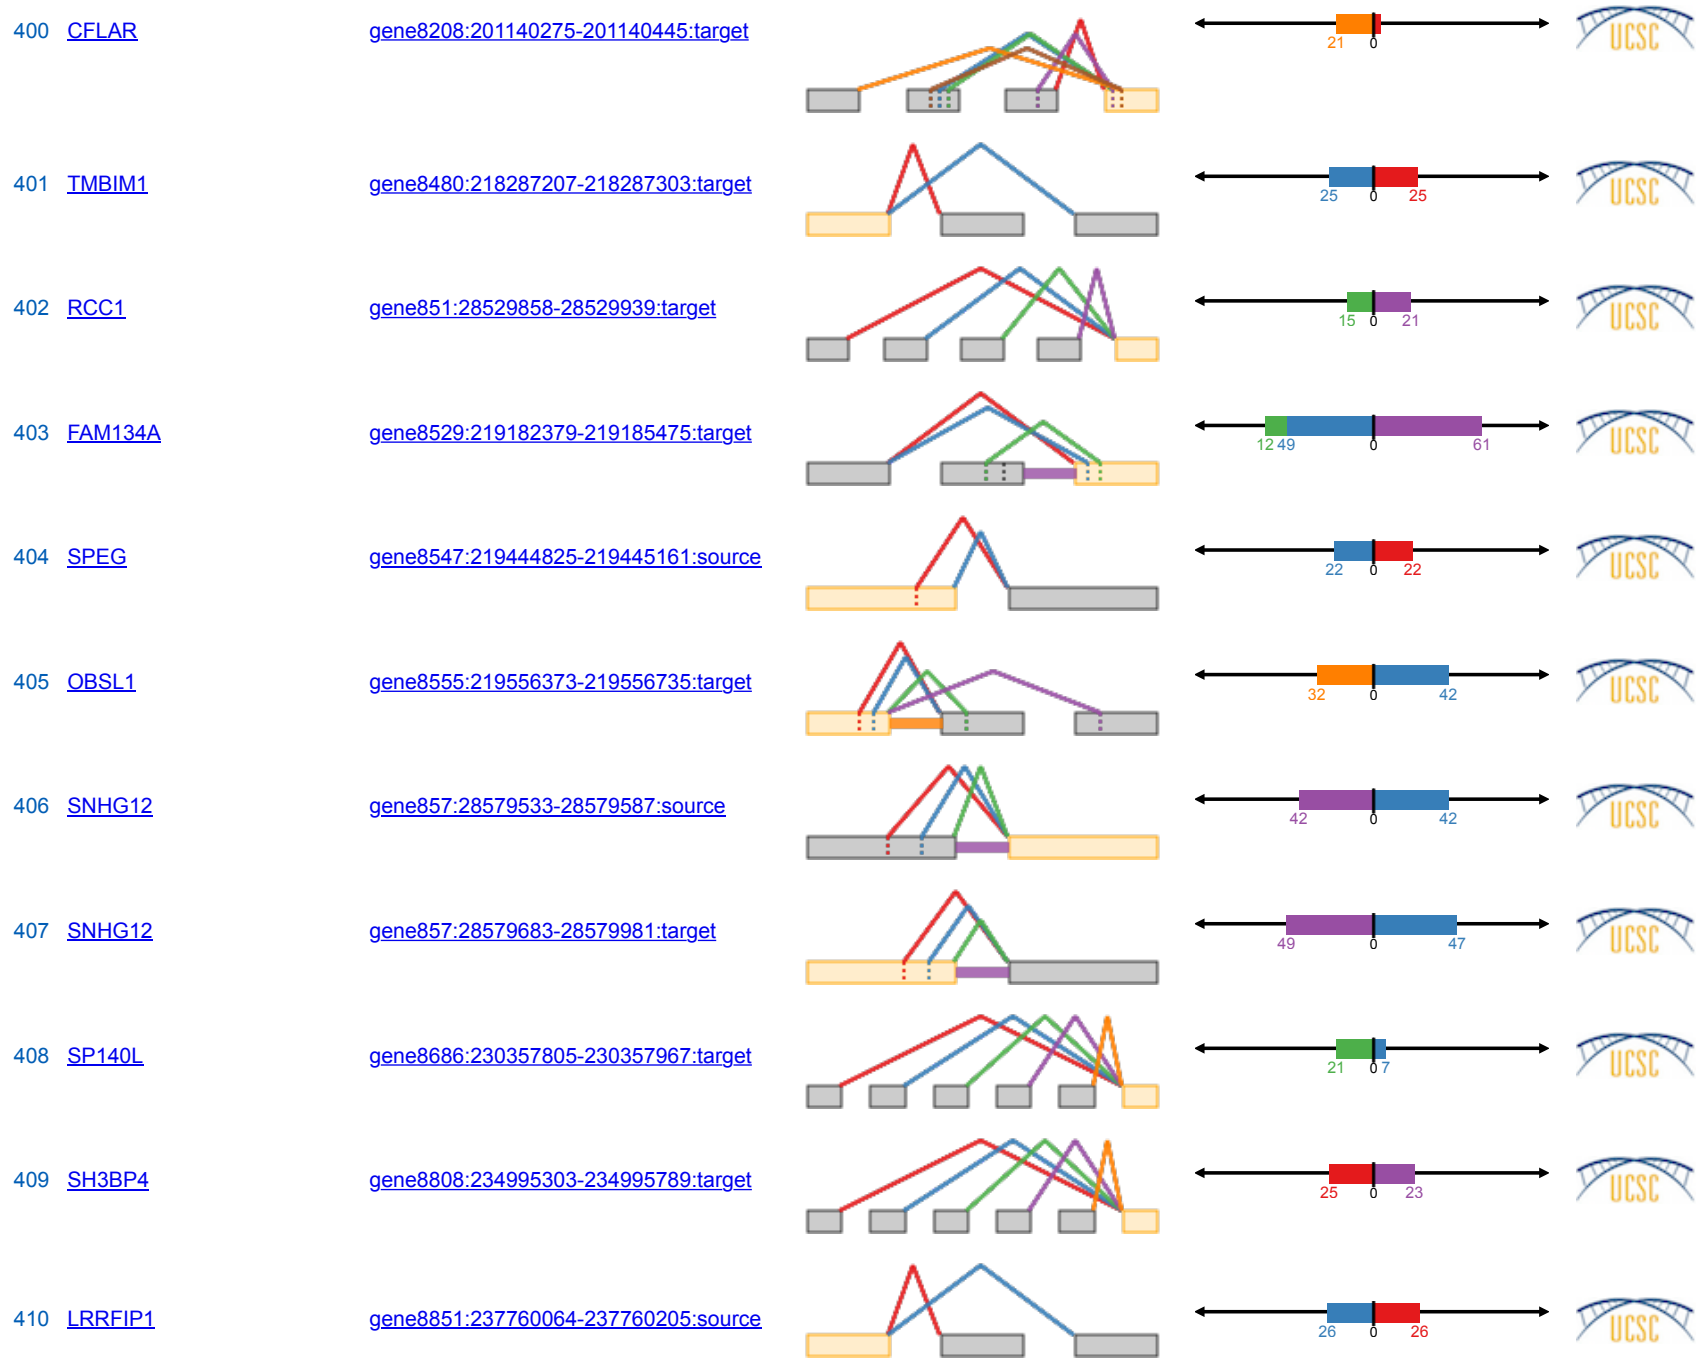

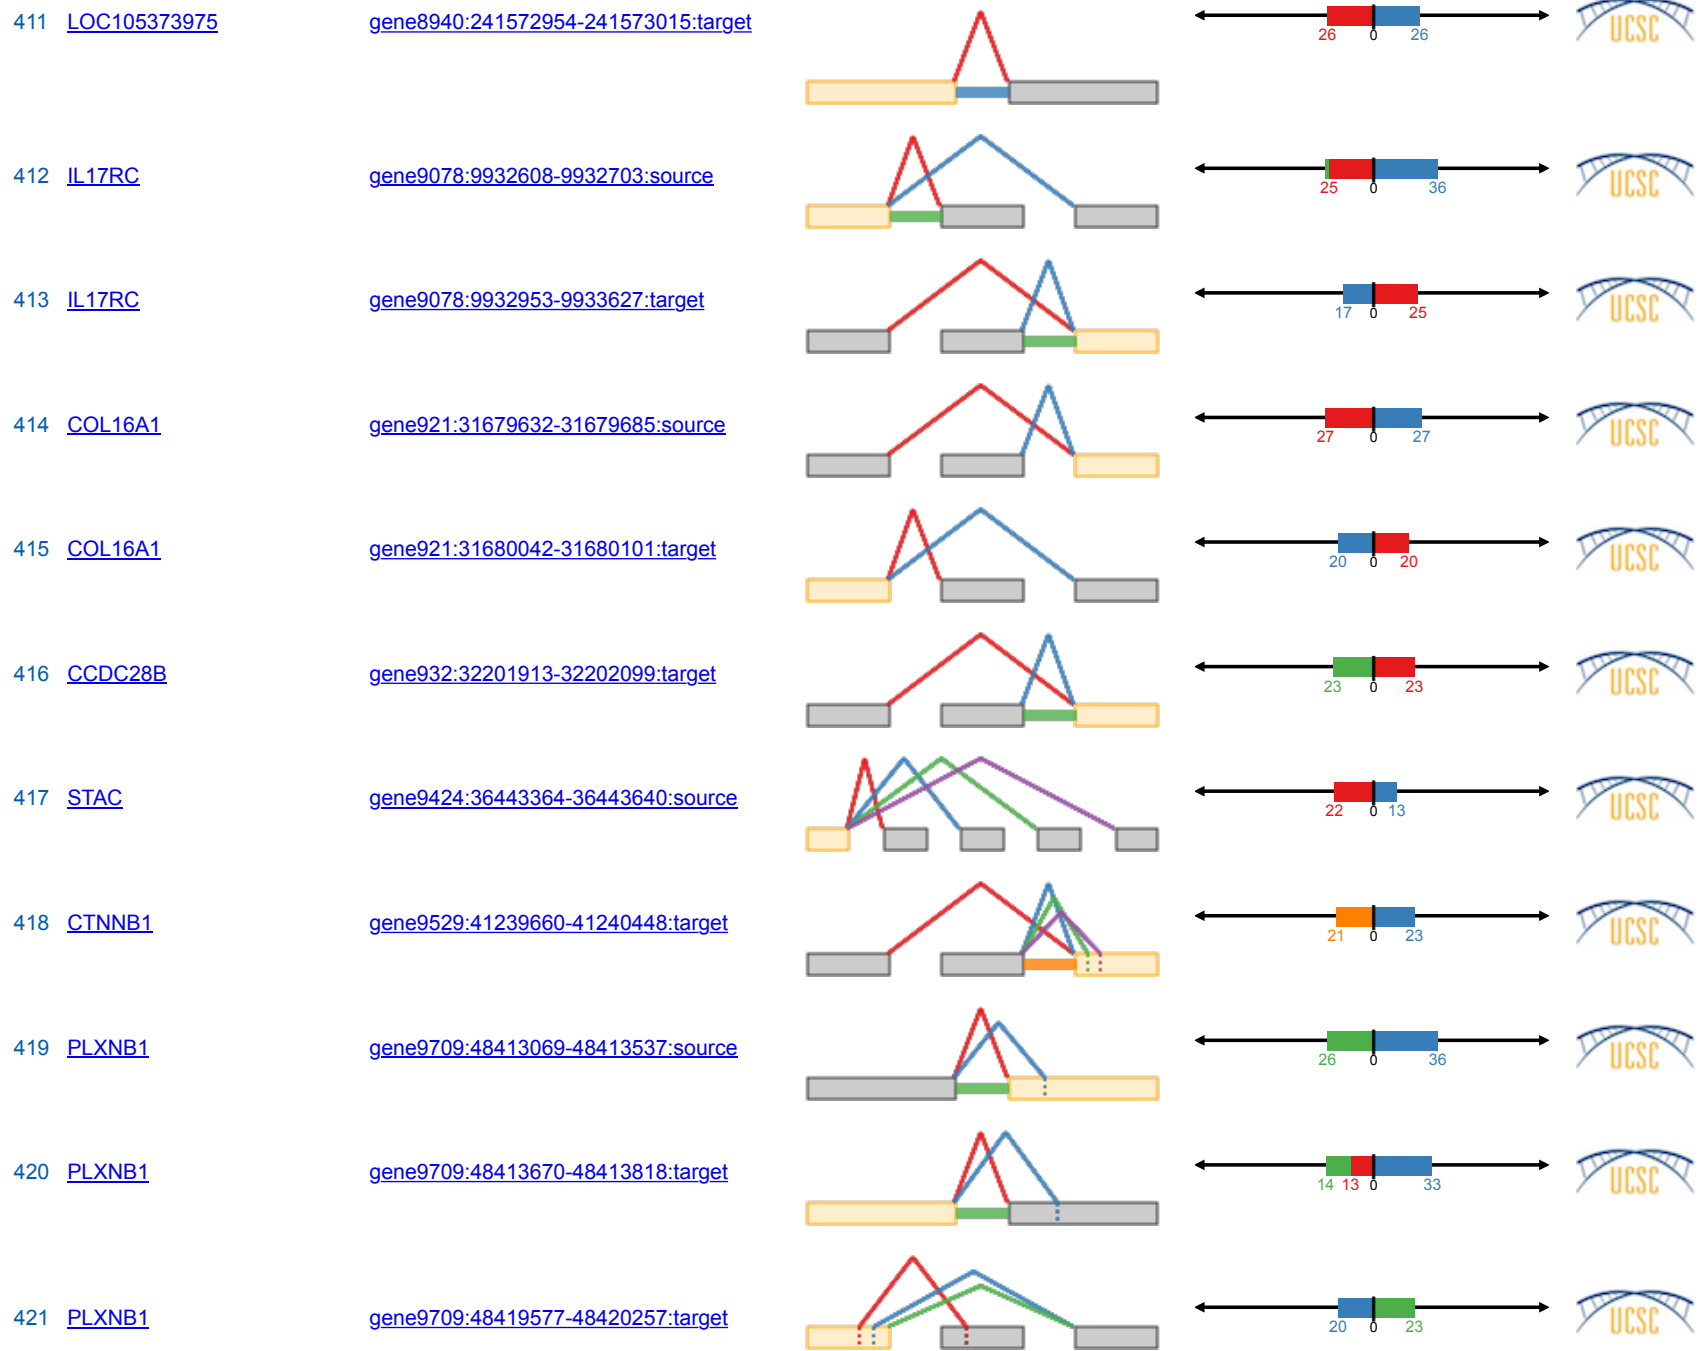

|     |                       |                                                   |
|-----|-----------------------|---------------------------------------------------|
| 422 | <a href="#">PBRM1</a> | <a href="#">gene9882:52550747-52550817:source</a> |
| 423 | <a href="#">PBRM1</a> | <a href="#">gene9882:52561767-52561968:target</a> |
| 424 | <a href="#">FLNB</a>  | <a href="#">gene9969:58130741-58130908:source</a> |
| 425 | <a href="#">FLNB</a>  | <a href="#">gene9969:58132808-58132931:target</a> |

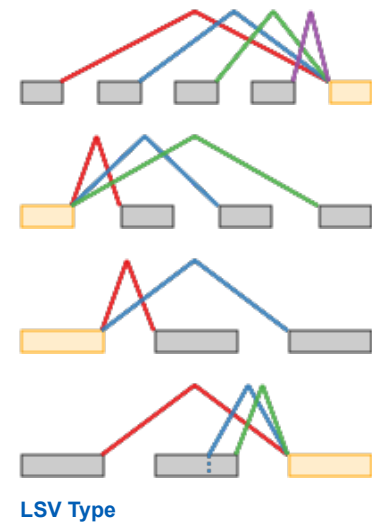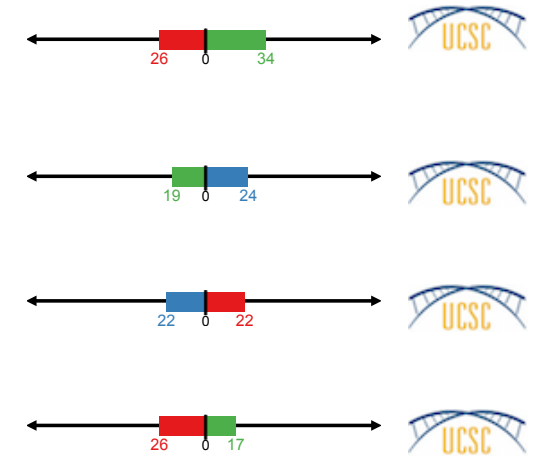

# Gene LSV ID

← More in nonT | More in siTM7 → [Coordinates Links](#)
